# Supplementary material for: Urogenital schistosomiasis (UGS) and female genital schistosomiasis (FGS) in Cameroon: an observational assessment of key reproductive health determinants of girls and women in the Matta Health Area
Source: PubMed Central journal article supplement — BMJ Open. 2023 Feb 14;13(2):e063392. doi: 10.1136/bmjopen-2022-063392 (PMC9930553; doi:10.1136/bmjopen-2022-063392), 2023-02-14
Supplement: bmjopen-2022-063392.draft_revisions.pdf [file bmjopen-2022-063392.draft_revisions.pdf]

# BMJ Open

BMJ Open is committed to open peer review. As part of this commitment we make the peer review history of every article we publish publicly available.

When an article is published we post the peer reviewers' comments and the authors' responses online. We also post the versions of the paper that were used during peer review. These are the versions that the peer review comments apply to.

The versions of the paper that follow are the versions that were submitted during the peer review process. They are not the versions of record or the final published versions. They should not be cited or distributed as the published version of this manuscript.

BMJ Open is an open access journal and the full, final, typeset and author-corrected version of record of the manuscript is available on our site with no access controls, subscription charges or pay-per-view fees (<http://bmjopen.bmj.com>).

If you have any questions on BMJ Open's open peer review process please email [info.bmjopen@bmj.com](mailto:info.bmjopen@bmj.com)

# BMJ Open

## Urogenital Schistosomiasis (UGS) and Female Genital Schistosomiasis (FGS) in Cameroon: An in-depth assessment of reproductive health determinants of girls and women in the Matta Health Area

|                               |                                                                                                                                                                                                                                                                                                                                                                                                                                                                                                                                                                                                                                                         |
|-------------------------------|---------------------------------------------------------------------------------------------------------------------------------------------------------------------------------------------------------------------------------------------------------------------------------------------------------------------------------------------------------------------------------------------------------------------------------------------------------------------------------------------------------------------------------------------------------------------------------------------------------------------------------------------------------|
| Journal:                      | <i>BMJ Open</i>                                                                                                                                                                                                                                                                                                                                                                                                                                                                                                                                                                                                                                         |
| Manuscript ID                 | bmjopen-2022-063392                                                                                                                                                                                                                                                                                                                                                                                                                                                                                                                                                                                                                                     |
| Article Type:                 | Original research                                                                                                                                                                                                                                                                                                                                                                                                                                                                                                                                                                                                                                       |
| Date Submitted by the Author: | 30-Mar-2022                                                                                                                                                                                                                                                                                                                                                                                                                                                                                                                                                                                                                                             |
| Complete List of Authors:     | Makia, Christine Masong; Catholic University of Central Africa, Social Sciences and Management<br>Fesuh, Nono Bertrand; National Advanced School of Engineering, University of Yaoundé 1, Cameroon, Department of Mathematics and Physical Sciences<br>Tchoffo, Marlene; Catholic University of Central Africa, Social and Management Sciences<br>Gamba, Victoria A; University of Nairobi, Department of Obstetrics and Gynecology<br>Oluwole, Akinola Stephen; Federal University of Agriculture Abeokuta, Department of Pure and Applied Zoology<br>Stothard, Russell; Liverpool School of Tropical Medicine, Department of Tropical Disease Biology |
| Keywords:                     | Public health < INFECTIOUS DISEASES, Epidemiology < TROPICAL MEDICINE, PARASITOLOGY                                                                                                                                                                                                                                                                                                                                                                                                                                                                                                                                                                     |
|                               |                                                                                                                                                                                                                                                                                                                                                                                                                                                                                                                                                                                                                                                         |

SCHOLARONE™  
Manuscripts

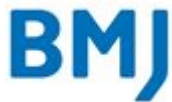

I, the Submitting Author has the right to grant and does grant on behalf of all authors of the Work (as defined in the below author licence), an exclusive licence and/or a non-exclusive licence for contributions from authors who are: i) UK Crown employees; ii) where BMJ has agreed a CC-BY licence shall apply, and/or iii) in accordance with the terms applicable for US Federal Government officers or employees acting as part of their official duties; on a worldwide, perpetual, irrevocable, royalty-free basis to BMJ Publishing Group Ltd ("BMJ") its licensees and where the relevant Journal is co-owned by BMJ to the co-owners of the Journal, to publish the Work in this journal and any other BMJ products and to exploit all rights, as set out in our [licence](#).

The Submitting Author accepts and understands that any supply made under these terms is made by BMJ to the Submitting Author unless you are acting as an employee on behalf of your employer or a postgraduate student of an affiliated institution which is paying any applicable article publishing charge ("APC") for Open Access articles. Where the Submitting Author wishes to make the Work available on an Open Access basis (and intends to pay the relevant APC), the terms of reuse of such Open Access shall be governed by a Creative Commons licence – details of these licences and which [Creative Commons](#) licence will apply to this Work are set out in our licence referred to above.

Other than as permitted in any relevant BMJ Author's Self Archiving Policies, I confirm this Work has not been accepted for publication elsewhere, is not being considered for publication elsewhere and does not duplicate material already published. I confirm all authors consent to publication of this Work and authorise the granting of this licence.

1  
2  
3 1 **Title:** Urogenital Schistosomiasis (UGS) and Female Genital Schistosomiasis (FGS) in Cameroon: An  
4 in-depth assessment of reproductive health determinants of girls and women in the Matta Health Area  
5  
6  
7 3

8  
9 4 **Authors:** Makia Christine Masong<sup>1,\*</sup>, Fesuh Nono Betrand<sup>2</sup>, Tchoffo Marlene Nstinda<sup>1</sup>, Victoria A.  
10 Gamba<sup>3</sup>, Akinola Stephen Oluwole<sup>4</sup>, J. Russell Stothard<sup>5</sup>  
11  
12  
13 6

14  
15  
16 7 <sup>1</sup>Department of Social Sciences and Management, Catholic University of Central Africa, Yaoundé,  
17 Cameroon  
18  
19 8

20  
21 9 <sup>2</sup>Department of Mathematics and Physical Sciences, National Advanced School of Engineering,  
22 University of Yaoundé 1, Cameroon  
23  
24 10

25  
26 11 <sup>3</sup>Department of Obstetrics and Gynecology, University of Nairobi, Nairobi, Kenya  
27

28  
29 12 <sup>4</sup>Department of Pure and Applied Zoology, Federal University of Agriculture, Abeokuta, Nigeria  
30

31 13 <sup>5</sup>Department of Tropical Disease Biology, Liverpool School of Tropical Medicine, Liverpool, L3  
32 5QA, UK  
33  
34 14  
35  
36 15  
37  
38  
39 16

40  
41 17 **\*Corresponding author**

42 Makia Christine Masong

43 18 Department of Social Sciences and Management, Catholic University of Central Africa, Yaoundé, Cameroon

44  
45 19 Projet MTN/OCEAC

46  
47 20 [masongbye@yahoo.com](mailto:masongbye@yahoo.com)  
48  
49 21  
50  
51  
52 22  
53  
54  
55 23  
56  
57 24  
58  
59  
60 25

1  
2  
3 **26 Abstract**  
4

5 **27 Objectives and Setting:** Across sub-Saharan Africa, Urogenital Schistosomiasis (UGS), in particular  
6  
7 **28 Female Genital Schistosomiasis (FGS)** is a significant waterborne parasitic disease. FGS affects the  
8  
9 well-being of millions of girls and women, yet its direct burden upon sexual and reproductive health  
10  
11 (SRH), of sufferers is infrequently measured, as is the case in Cameroon. Our study therefore focused  
12  
13 upon FGS and sought to identify current associations with several key reproductive health indicators,  
14  
15 to provide formative information for better integrated control with UGS.  
16  
17

18  
19 **33 Participants:** From a population of 304 females all examined for UGS by urine filtration and  
20  
21 microscopy (UGS prevalence = 63.8%; 95% CI: 58.3–69), an unbiased sub-group of 67 girls and  
22  
23 women aged >13 was examined clinically for FGS. This included application of portable colposcopy,  
24  
25 a technique not available in routine primary care, with observed sequelae classified according to the  
26  
27 WHO FGS pocket atlas.  
28  
29

30 **38 Outcome:** Within this sub-group, the prevalence of FGS was 50.7% (34/67) and 59.7% (40/67) for  
31  
32 UGS, with most common FGS pathologies being abnormal blood vessels, homogenous yellow sandy  
33  
34 patches and grainy sandy patches.  
35  
36

37 **41 Results:** Epidemiological associations with FGS and UGS were investigated by univariate and  
38  
39 multivariate logistic regression analyses. In terms of age of sufferers, FGS increased significantly with  
40  
41 ascending age, whilst a non-significant decrease with descending age was observed for UGS. Of note,  
42  
43 girls and women with FGS exhibited increased menstrual abnormalities/irregularities (MI). Lower  
44  
45 abdominal pain (LAP) was identified as the only significant shared symptom of both FGS (AOR 9.5;  
46  
47 95% CI: 1.7–81.5) and UGS (AOR 4.3; 95% CI: 1.4–14.4), while LAP with MI appeared a strong  
48  
49 epidemiological flag for FGS.  
50  
51

52 **48 Conclusion :** LAP and MI provide two under-explored dimensions in SRH that could be exploited in  
53  
54 future for targetting of praziquantel provision to FGS sufferers within primary care, complementary  
55  
56 with existing distribution for UGS sufferers.  
57  
58  
59  
60

1  
2  
3 51 **Keywords:** *Schistosoma haematobium*, clinical colposcopy, questionnaires, menstrual health,  
4  
5 52 abdominal pain  
6  
7

8 53  
9

## 10 54 **Key Messages**

### 11 55 **What is already known on this topic**

12  
13  
14  
15 56 - Whilst millions of women in Cameroon have UGS, its epidemiological connection with FGS is not  
16 57 fully appreciated, which creates an unfortunate knowledge bottleneck for effective control at the  
17 58 public health level  
18  
19  
20

### 21 59 **What this study adds**

22  
23  
24 60 - A detailed insight into the connection of FGS and UGS within a primary care setting, denoting  
25 61 those with cardinal symptomologies more explicitly for scalable detection and targeted control of FGS  
26 62 within UGS endemic areas  
27  
28  
29

30 63 - Using clinical colposcopy combined with an analysis of sexual and reproductive health  
31 64 determinants, we develop a simple questionnaire approach which can better capture FGS sufferers  
32 65 within endemic areas for UGS  
33  
34  
35

### 36 66 **How this study might affect research, practice or policy**

37  
38 67 - Formative evidence is provided with initial recommendations, towards developing better national  
39 68 surveillance and control of FGS, thereby better empowering women's health within the Central  
40 69 African Region  
41  
42  
43

44 70

45 71

46 72

47 73

48 74

49 75

50 76

51 77  
52  
53  
54  
55  
56  
57  
58  
59  
60

## 78 **Introduction**

79 Urogenital schistosomiasis (UGS) and female genital schistosomiasis (FGS) although are both caused  
80 by infection with *Schistosoma haematobium*, a waterborne blood fluke, each appear to have rather  
81 obscure epidemiological associations, largely due to insufficient disease surveillance[1-3]. In sub-  
82 Saharan Africa where UGS is endemic and can be highly prevalent (>50%), insufficient or infrequent  
83 efforts have been undertaken to document FGS specifically, partly as the clinical skills to do so are  
84 bottlenecked within primary care[2]. While active UGS does not readily predict FGS, since FGS can  
85 occur without the direct presence of schistosome eggs in urine (a cardinal diagnostic for UGS[4]),  
86 rather FGS often presents with a more chronic time frame where schistosome eggs trapped within the  
87 cervico-vaginal surfaces[3, 5, 6]. For some, these trapped eggs can accumulate from very early on in  
88 life with enduring and typically hidden or cryptic sequelae[5, 7]. Based on several plausible biological  
89 determinants, the mucosal damage and fibrotic scarring of the vaginal and cervical surfaces from FGS  
90 proceeds with increasing duration of UGS infection(s)[3]; moreover, FGS-specific sequelae maybe  
91 slow to resolve upon standard antiparasitic treatment of UGS, i.e., single annual administration of  
92 praziquantel at 40mg/g as used in public health campaigns[3, 5].

93 In many parts of Africa where surveillance of UGS is poor and that for FGS is largely absent, there is  
94 a clear need to better understand the epidemiological associations between UGS and FGS. Particularly  
95 so to support earlier diagnosis of cases of FGS and individualize praziquantel treatment needs to better  
96 avert their disease progression; current interventions against UGS do not specifically target adolescent  
97 girls or women[8] though with the new WHO 2022 guideline, there is new encouragement to do so[9].  
98 This gap in treatment coverage also has considerable bearing on progress towards elimination of  
99 schistosomiasis transmission within disease endemic communities[9].

100 In recent years, FGS focused research and public health education[10] has gained traction in certain  
101 countries such as Ghana and Madagascar, although other countries ,such as Cameroon currently lag  
102 behind. Schistosomiasis exists in several regions of Cameroon affecting over 10 million people in  
103 rural and urban areas[11], and the country has a national coordinated control plan for fairly early  
104 interventions during child-hood years (from 5 – 14 years old). These take advantage of school based

1  
2  
3 105 intervention platforms[12, 13] and in certain settings with community based interventions where their  
4  
5 106 at-risk status is high[13, 14]. Over the last decade, there has been an approximate 70% reduction of  
6  
7 107 schistosomiasis prevalence amongst school-aged children by 2019[11]. However, due to existing  
8  
9 108 policy gaps and program intervention bottlenecks, some of the adolescent at-risk populations do not  
10  
11 109 always benefit from praziquantel treatment[15] and in respect of FGS, many girls and women are  
12  
13 110 missed out in treatment campaigns and not provided with adequate individualized treatments.

14  
15 111 To address this treatment deficit, with better knowledge on the precise associations between UGS and  
16  
17 112 FGS, future control policies and intervention campaigns can be revised to better target at-risk  
18  
19 113 populations. For example, this could be upon future activation of integrated primary health care for  
20  
21 114 better management of FGS, which is currently lacking. Understanding the risks and associations of  
22  
23 115 these UGS and FGS, especially within different contexts of women's health, sheds greater light on the  
24  
25 116 disease epidemiology, which could foster improved control measures both locally and nationally.  
26  
27 117 Furthermore, precisely documenting existing associations between both FGS and UGS clarifies  
28  
29 118 further the strong need for precision mapping of schistosomiasis in endemic regions, for formulating a  
30  
31 119 better targeted integrated response.

32  
33  
34 120 In our study, we sought to clarify existing associations between FGS and UGS, highlighting cardinal  
35  
36 121 symptomologies for scalable detection and targeted control of FGS within UGS endemic areas. This  
37  
38 122 supports the need for a future integrated approach for control of schistosomiasis, and limits the “gap”  
39  
40 123 concerning FGS surveillance within current primary care.

41  
42  
43 124

## 44 125 **Materials and Methods**

### 45 126 **Ethics approval and consent to participate**

46  
47  
48 127 Ethical clearance for the study was provided by the Cameroon National Ethics committee on Human  
49  
50 128 Health Research (Ref N ° 2020/07/1266/CE/CNERSH/SP), with administrative authorizations from  
51  
52 129 both from the Regional Delegation of Public Health for the West region of Cameroon (Ref N°  
53  
54 130 679/L/MINSANTE/SG/DRSPO/CBF), the district Health Office of the Malanteoun Health District  
55  
56 131 (Ref N° 078/L/MINSANTE/DRSPO/DSMLT). Informed written and oral consent was obtained from  
57  
58  
59  
60



1  
2  
3 132 all participants for parasitological and gynecological examinations. For participants <18 years, parents,  
4  
5 133 husbands, or guardian gave informed permission and assent was obtained from the participants.  
6  
7 134 Privacy and confidentiality of medical information were protected during and after the study.  
8  
9

### 10 135 **Patient and Public Involvement**

11  
12 136 We followed national guidelines to get overall patient and public involvement guidance, and tailored  
13  
14 137 visits for data collection according to best practice and local engagement. Written assent of  
15  
16 138 participants was gotten in their homes.  
17  
18

### 19 139 **Study Setting**

20  
21  
22 140 This study was carried out across a sub-group of girls and women residing in remote fishing  
23  
24 141 communities in the Matta Health Area in the West Region of Cameroon, around the Mape Dam, a  
25  
26 142 known transmission focus for *Schistosoma haematobium*[11, 16]. Apart from reporting symptoms for  
27  
28 143 UGS such as blood in urine, for FGS specifically included vaginal itch and smelly discharge, lower  
29  
30 144 abdominal pain, painful coitus, missed periods and miscarriages[17]. As previously detailed, all study  
31  
32 145 participants were involved actively in fishing or other household activity that put them in constant  
33  
34 146 contact with the lake water,[17]. Of note, the Matta Health Area hosts several remote fishing island  
35  
36 147 communities that surround the man-made barrage (Mape Dam), and for at least 18 years has  
37  
38 148 witnessed high transmission of *S. haematobium* with prevalence of UGS in children greater than  
39  
40 149 50%[18].  
41  
42  
43

### 44 150 **Study Design and Procedures**

45  
46  
47 151 This observational cross-sectional survey was conducted between the periods of December 2020 to  
48  
49 152 June 2021. The total population estimate of the study site was 5,000 people[19], where women  
50  
51 153 represented 51.0% of the population, with the age group 15-64 years representing 54.6% of the total  
52  
53 154 population. Using a simple random sampling technique, on the base of attaining a precision rate of  
54  
55 155 95% with an error margin of 5%, our initial sample size was estimated statistically using the  
56  
57 156 population proportion formula  $n = N * X / (X + N - 1)$ , where,  $X = Z_{\alpha/2} * \sqrt{p * (1-p)} / MOE^2$ , and  $Z_{\alpha/2}$   
58  
59 157 is the critical value of the normal distribution at  $\alpha/2$  (for the confidence level of 95%,  $\alpha$  is 0.05 and the  
60

1  
2  
3 158 critical value is 1.96), MOE is the margin of error (5%), p is the sample proportion (55%), and N is the  
4  
5 159 population size (1400), giving a required sample size of 387. This was later attained with a 85%  
6  
7 160 success rate[17] due to logistic and cultural limits. Of the 304 participants originally sampled and  
8  
9 161 tested for UGS, a sub-group of 67 women and girls from an unbiased selection with explicit inclusion  
10  
11 162 and exclusion criteria underwent clinical gynecological examination (for FGS) by colposcopy with  
12  
13 163 photo documentation. For this sub-group an exclusion criteria of: age (>13 years), virginity status (not  
14  
15 164 virgin), menstruation (not in current menses), and pregnancy (not pregnant), was applied alongside  
16  
17 165 obtaining consent for gynecological exam (Fig 1), by a trained gynecologist with previous experience  
18  
19 166 in diagnosing FGS.  
20  
21  
22  
23 167

24  
25 168 **Figure 1: Study participant selection criteria and numbers with diagnostic methods flow**  
26  
27 169

28  
29  
30 170 A structured questionnaire (see Supplementary File 1) with FGS related symptoms, sexual and  
31  
32 171 reproductive health, and socio-demographic questions was administered privately in a one-to-one  
33  
34 172 format. On average interviews were completed during 35 minutes and were conducted after the urine  
35  
36 173 was collected from each study participant. Each participant responded to the structured questionnaire  
37  
38 174 and was prompted to discuss further on related symptoms if they wished to share, but these were not  
39  
40 175 formally registered by the questionnaire.  
41  
42  
43

44 176 Participants were selected for gynecological examination based on having a UGS urine test performed  
45  
46 177 and having a completed response to questionnaire concerning FGS symptoms and water contact  
47  
48 178 activity. Sexual and reproductive health questions included : sexual activeness, age at marriage, number  
49  
50 179 of children, age of last child, any miscarriage, menstrual irregularities or abnormalities. Demographic  
51  
52 180 questions asked included: age, level of formal or informal schooling achieved, water contact activities,  
53  
54 181 and income generating activities. Most females encountered were married by age14, which helped  
55  
56 182 guide the minimum age band set for the study. To better explore age-related profiles, three age sub-  
57  
58 183 groups were formed: adolescence (14-19), young adults (20-35) and older adults (36+).  
59  
60

## 184 **Parasitological and Gynecological Examinations**

185 At least 10 ml of urine was collected and analyzed by visual inspection for macrohaematuria and then  
186 tested for microhaematuria and proteinuria with reagent strips (Siemens Multistix 10 SG) at the local  
187 health center laboratory on the same day of collection. Urine syringe filtration technique was  
188 performed with visualization of schistosome eggs by x100 using a light compound and stained with  
189 Lugol's iodine. A sample was deemed positive for *S. haematobium* if at least one terminal-spined  
190 ovum was seen, and the number of ova reported as per  $\geq 50$  (high intensity) or  $< 50$  (low intensity).  
191 Next, consenting eligible girls and women were examined by clinical colposcopy with photo-  
192 documentation, using a hand held colposcope (EVA COLPO, Mobile ODT). The obtained images  
193 were cross-checked against the WHO FGS pocket atlas[20] to record key sequelae. These were then  
194 saved in a coded database, accessible to predetermined independent experts. An FGS positive case was  
195 declared upon the presence of either sandy patches, abnormal blood vessels and sandy patches on  
196 homogenous yellow areas in line with the WHO FGS pocket atlas coding[20].

## 197 **Statistical Analysis**

198 All numerical data on girls and women examined for FGS ( $n = 67$ ) were extracted from the main  
199 database in Excel and imported into the R (version 4.0.2) software for statistical analyses. In univariate  
200 analysis, frequencies and proportions were reported for socio-demographic characteristics. In bivariate  
201 analysis, Pearson's chi-squared tests were used to test the dependence of reproductive health  
202 related independent variables against FGS or UGS (dependent variables). To further explain such  
203 dependence, univariate logistic regression analyses was used, with the results presented in the form of  
204 unadjusted odds ratios. To identify amongst the reproductive health related independent variables  
205 associated to UGS and FGS, multivariate logistic regressions analyses were used, with the results  
206 presented in the form of adjusted odds ratios (AOR), alongside 95% confidence intervals (CI) and  $p$ -  
207 values based on the Wald's Test. To fit the models, only factors significantly related to the outcomes  
208 at a 25% level of significance in the univariate models were included. Multicollinearity between  
209 independent variables was tested using the variance inflation factor. The forward-backward stepwise  
210 selection method was used to obtain the "best" fitting models. Analysis of deviance tables

211 accompanied by likelihood ratio tests were used to assess the global significance of the different  
 212 variables in the final statistical models. In all, the level of significance was set at  $p < 0.05$ .

213

## 214 **Results**

### 215 i. **Demographic Characteristics of Participants**

216 Analysis was restricted to the 67 post-menarche sexually active girls and women above the age of 13  
 217 who gave informed consent for and participated in full for all aspects of the study. Participants were  
 218 classified into 3 age-groups: adolescents (14 -19 years); young adults (20-35 years); and older adults  
 219 (36+ years). Table 1 presents a summary of the socio-demographic characteristics (age-group,  
 220 residence, marital status and water contact history) of the study participants. The median age was 21  
 221 years; interquartile range [IQR] 18–25, where adolescents represented 28.4% of the study participants,  
 222 young adults 43.3%, and older adults 28.4%.

223 **Table 1: Participant Characteristics**

| 224 <b>Socio-demographical characteristics</b> |          |                   |
|------------------------------------------------|----------|-------------------|
| 225                                            | <b>N</b> | <b>Proportion</b> |
| 225 <b>Age group (N= 67)</b>                   |          |                   |
| 226 14-19                                      | 19       | 28.4%             |
| 227 20-35                                      | 29       | 43.3%             |
| 228 36+                                        | 19       | 28.4%             |
| 229 <b>Economic activity (N= 67)</b>           |          |                   |
| 230 Fishing                                    | 31       | 46.4%             |
| 231 Farming                                    | 03       | 4.5%              |
| 232 Fishing/Farming                            | 33       | 49.3%             |
| 233 <b>Proximity to lake (N= 67)</b>           |          |                   |
| < 200m                                         | 07       | 89.6%             |
| ≥200m                                          | 60       | 10.4%             |
| 234 <b>Marital status (N= 67)</b>              |          |                   |
| 235 Married                                    | 66       | 98.5%             |
| 236 Widowed                                    | 1        | 1.5%              |

231 None of the 67 participants had completed primary level of education (formal education), all had  
 232 completed a cultural training (informal education) considered as a requisite for socialization and  
 233 marriage. Over 98% of participants were currently married, about 35% by the age of 14, and the

234 remainder after the age of 15. The main occupations were fishing and farming (49.3%), fishing  
235 (46.3%), and farming only (4.5%).

236 Of the total number of participants (n=67), 40 were confirmed to have ova-patent UGS, and 34 for  
237 FGS upon the presence of homogenous yellow sandy patches, grainy sandy patches and abnormal  
238 blood vessels. One participant was noted to have rubbery papules, a condition previously thought to be  
239 restricted to Madagascar, and is the first time this condition has been reported in Cameroon (Fig 2).

240

241 **Figure 2 : Imagery of FGS pathology of the cervix with reported lesions (magnification of x4)**

242 **A)** 1-rubbery papule, 2-abnormal blood vessel, 3- homogeneous sandy patch (30 year old woman, +UGS,  
243 +lower abdominal pain, +Menstrual irregularity) ; **B)** 1,2- grainy sandy patches (45 year old woman, -UGS,  
244 +lower abdominal pain ; +Menstrual irregularity)

245

246 **ii. UGS, FGS and associations with reproductive health characteristics**

247 Age, number of children, age of last child, menstrual abnormality, miscarriages, and lower abdominal  
248 pain were identified as possible reproductive health factors associated with *S. haematobium* infection,  
249 and were used within this study. Table 2 presents UGS, FGS and their relationship with these  
250 reproductive health characteristics, based on chi-square tests of independence on one hand, and  
251 univariate logistic regression on the other. Generally, both FGS and UGS were not significantly ( $P$ -  
252 value  $>0.05$ ) related to number of children, age of last child and miscarriages. However, a significant  
253 relationship between FGS and age group ( $P=0.009$   $X^2$  test) and menstrual abnormality ( $P=0.005$   $X^2$   
254 test) was observed, while both FGS ( $P=0.001$   $X^2$  test) and UGS ( $P=0.023$   $X^2$  test) were observed to be  
255 significantly associated with lower abdominal pain. In effect, the probability of infection with FGS  
256 was seen to increase with age, with unadjusted odds ratios (UOR) of 6.4 (95% C: I 1.6-30.4) for older  
257 adults, 6.1 (95% CI: 1.7-26.1) for young adults, relative to adolescents as reference category. On the  
258 other hand, a non-significant decrease in chances of infection with urogenital schistosomiasis was

1  
2  
3 259 observed with increasing age. Furthermore, the chances of FGS infection amongst girls with menstrual  
4  
5 260 abnormality (collected as irregular, painful or ceased menstruation), was UOR 7.1(95% CI: 2.5-22.1)  
6  
7 261 times that for girls without the abnormality. Chances of FGS infection amongst women with lower  
8  
9 262 abdominal pain, was 17.1 (95% CI: 4.2-117.1) times that of women without lower abdominal pain. A  
10  
11 263 similar trend was observed with UGS, but on a lower scale [UOR 4.3 (95% CI: 1.4-14.4)].  
12  
13  
14 264 Additionally, a non-statistically significant increase in prevalence of menstrual abnormalities was  
15  
16 265 observed with increasing age ( $X^2=1.51$ ,  $df=2$ ,  $p\text{-value}=0.469$ ). In effect, the prevalence of menstrual  
17  
18 266 abnormalities amongst adolescents was 44.4%, young adults 48.3%, and older adults 63.2%.  
19  
20  
21  
22  
23  
24  
25  
26  
27  
28  
29  
30  
31  
32  
33  
34  
35  
36  
37  
38  
39  
40  
41  
42  
43  
44  
45  
46  
47  
48  
49  
50  
51  
52  
53  
54  
55  
56  
57  
58  
59  
60

1  
2  
3  
4  
5

**Table 2:** Associations of certain sexual and reproductive health characteristics between UGS and FGS: Univariate logistic regression model on the effects of UGS and FGS on sexual and reproductive health factors and on the probability of contracting FGS after UGS

| SRH Indicator              | Category | FGS                       |            |              |                                |         | N  | UGS                       |            |              |                                |         |
|----------------------------|----------|---------------------------|------------|--------------|--------------------------------|---------|----|---------------------------|------------|--------------|--------------------------------|---------|
|                            |          | Chi2 Test of Independence |            |              | Univariate logistic regression |         |    | Chi2 Test of Independence |            |              | Univariate logistic regression |         |
|                            |          | FGS + n(%)                | FGS - n(%) | P value      | Unadjusted OR (95% C.I.)       | P value |    | UGS + n(%)                | UGS - n(%) | P value      | Unadjusted OR (95% C.I.)       | P value |
| Age group                  | 13-19    | 4 (11.8)                  | 15 (45.5)  | <b>0.009</b> | 1.0                            |         | 19 | 13 (32.5)                 | 6 (22.2)   | <b>0.439</b> | 1.0                            |         |
|                            | 20-35    | 18 (52.9)                 | 11 (33.3)  |              | 6.1 (1.7, 26.1)                | 0.008   | 29 | 18(45)                    | 11(40.7)   |              | 0.8 (0.2, 2.5)                 | 0.653   |
|                            | 36+      | 12 (35.3)                 | 7 (21.2)   |              | 6.4 (1.6, 30.4)                | 0.012   | 19 | 9(22.5)                   | 10(37)     |              | 0.4 (0.1, 1.5)                 | 0.192   |
| Number of Children         | None     | 4 (11.8)                  | 9 (30)     | <b>0.107</b> | 1.0                            |         | 13 | 9(24.3)                   | 4(14.8)    | <b>0.185</b> | 1.0                            |         |
|                            | 1-3      | 10 (29.4)                 | 12 (40)    |              | 1.8 0.5, 8.7)                  | 0.394   | 22 | 12(32.4)                  | 10(37)     |              | 0.5 (0.1, 2.)                  | 0.394   |
|                            | 4-6      | 11 (32.4)                 | 4 (13.3)   |              | 6.2 (1.3, 36.1)                | 0.030   | 15 | 11(29.7)                  | 4(14.8)    |              | 1.2 (0.2, 6.6)                 | 0.811   |
|                            | 7+       | 9 (26.5)                  | 5 (16.7)   |              | 4.1 (0.9, 22.3)                | 0.088   | 14 | 5(13.5)                   | 9(33.3)    |              | 0.3 (0.0, 1.2)                 | 0.088   |
| Age of last child          | 1-3      | 13(46.4)                  | 15(71.4)   | <b>0.115</b> | 1.0                            |         | 28 | 14(53.8)                  | 14(60.9)   | <b>0.188</b> | 1.0                            |         |
|                            | 4-6      | 4(14.3)                   | 0(0)       |              | Inf                            | 0.993   | 4  | 4(15.4)                   | 0(0)       |              | Inf                            | 0.993   |
|                            | 7+       | 11(39.3)                  | 6(28.6)    |              | 2.1 (0.6, 7.7)                 | 0.237   | 17 | 8(30.8)                   | 9(39.1)    |              | 0.9 (0.3, 2.9)                 | 0.848   |
| Menstrual abnormality      | No       | 9(26.5)                   | 23(71.9)   | <b>0.005</b> | 1.0                            |         | 32 | 17(43.6)                  | 15(55.6)   | <b>0.453</b> | 1.0                            |         |
|                            | Yes      | 25(73.5)                  | 9(28.1)    |              | 7.1 (2.5, 22.1)                | <0.001  | 34 | 22(56.4)                  | 12(44.4)   |              | 1.6 (0.6, 4.4)                 | 0.340   |
| Miscarriages               | 0        | 8(23.5)                   | 15(50)     | <b>0.104</b> | 1.0                            |         | 23 | 11(29.7)                  | 12(44.4)   | <b>0.211</b> | 1.0                            |         |
|                            | 1        | 14(41.2)                  | 8(26.7)    |              | 3.3(1.0, 11.7)                 | 0.057   | 22 | 16(43.2)                  | 6(22.2)    |              | 2.9(0.9, 10.7)                 | 0.093   |
|                            | 2+       | 12(35.3)                  | 7(23.3)    |              | 3.2(0.9, 11.9)                 | 0.071   | 19 | 10(27)                    | 9(33.3)    |              | 1.2 (0.4, 4.2 )                | 0.757   |
| Lower abdominal pain       | No       | 2(5.9)                    | 16(51.6)   | <b>0.001</b> | 1.0                            |         | 18 | 6(15.8)                   | 12(44.4)   | <b>0.023</b> | 1.0                            |         |
|                            | Yes      | 32(94.1)                  | 15(48.6)   |              | 17.1 (4.2, 117.1)              | 0.001   | 47 | 32(84.2)                  | 15(55.6)   |              | 4.3(1.4, 14.4)                 | 0.014   |
| Parasitaemia (egg density) | 0        | 10(29.4)                  | 17(51.5)   | <b>0.172</b> | 1.0                            |         | 27 |                           |            |              |                                |         |
|                            | 1-49     | 15(44.1)                  | 9(27.3)    |              | 2.8 (0.9, 9.2)                 | 0.073   | 24 |                           |            |              |                                |         |
|                            | 50+      | 9(26.5)                   | 7(21.2)    |              | 2.2 (0.6, 7.9)                 | 0.224   | 16 |                           |            |              |                                |         |

269 \*Inf signifies very large odds ratio

36  
37  
38  
39  
40  
41  
42  
43  
44  
45  
46

270

271 **iii. Multivariate Logistic Regression Model for Reporting Reproductive Health Risk**  
 272 **Factors**

273 Multicollinearity was observed between age group, number of children and age of last child, and so we  
 274 resorted to excluding number of children and age of last child in the multivariate model. Multivariate  
 275 logistic regression analyses results for identifying associates amongst reproductive health  
 276 characteristics to both FGS and UGS infections are given in Table 3. After selection of the best fitting  
 277 models, the results show that the only significant risk factor for UGS is lower abdominal pain, whereas  
 278 age-group and lower abdominal pain were identified as the two main significant risk factors for FGS.  
 279 In the same line as with the Univariate regression results in Table 2, the probability of infection with  
 280 female genital schistosomiasis was seen to increase with age, with adjusted odds ratios (AOR) of 7.7  
 281 (95% CI: 1.4-55.7) for older adults, 5.9 (95% CI: 1.3-34.3) for young adults, relative to adolescents as  
 282 reference category. Chances of FGS infection amongst women with lower abdominal pain was AOR  
 283 9.5(95% CI:1.7-81.8) times that of women without the pain. Analysis of deviance tables for both best  
 284 fitting models (FGS and UGS), with *p*-values based on likelihood ratio tests are reported in Table 4.

285 **Table 3:** Key risk factors amongst SRH between UGS and FGS. A multivariate logistic regression  
 286 model on the effects of UGS and FGS on sexual and reproductive health factors and on the probability  
 287 of contracting FGS after UGS.

| SRH Indicator         | Category | FGS                              |         | UGS                              |         |
|-----------------------|----------|----------------------------------|---------|----------------------------------|---------|
|                       |          | Multivariate Logistic Regression |         | Multivariate Logistic Regression |         |
|                       |          | Adjusted OR (95% C.I.)           | P value | Adjusted OR (95% C.I.)           | P value |
| Age group             | 14-19    | 1.0                              |         | //                               |         |
|                       | 20-35    | 5.9 (1.3, 34.3)                  | 0.032   | //                               | //      |
|                       | 36+      | 7.7 (1.4, 55.7)                  | 0.027   | //                               | //      |
| Menstrual abnormality | No       | 1.0                              |         | //                               |         |
|                       | Yes      | 3.9 (1.0, 16.7)                  | 0.056   | //                               | //      |
| Lower abdominal pain  | No       | 1.0                              |         | 1.0                              |         |
|                       | Yes      | 9.5 (1.7, 81.8)                  | 0.017   | 4.3 (1.4, 14.4)                  | 0.014   |

288

289 // signifies that variable was not considered in the best fitting model

290



290

291 **Table 4:** Analysis of deviance tables showing the global significance of the different variables in the  
 292 best fitting models.

| Variable              | Df | Deviance | Resid. df | Resid. Dev | P-value |
|-----------------------|----|----------|-----------|------------|---------|
| <b>1. FGS</b>         |    |          |           |            |         |
| Age-group             | 2  | 7.916    | 62        | 82.050     | 0.019   |
| Menstrual abnormality | 1  | 14.024   | 61        | 68.031     | <0.001  |
| Lower abdominal pain  | 1  | 7.010    | 60        | 61.021     | 0.008   |
| <b>2. UGS</b>         |    |          |           |            |         |
| Lower abdominal pain  | 1  | 5.846    | 61        | 80.201     | 0.016   |

293

294

## 295 Discussion

296 Our study, given our application of portable colposcopy, is the first formal attempt to document the  
 297 pathology of FGS in a primary care setting in Cameroon. Elsewhere, the clinical pathology of FGS has  
 298 been described resulting from the complex inflammatory responses to antigens released by adult  
 299 worms and viable eggs, which persists until some time after adult worms are stopped egg-laying or are  
 300 destroyed by praziquantel[21]. Thereafter, various signs and symptoms may present months or even  
 301 years after treatment[22]. Though a non-significant association ( $P=0.172$ ) was observed between egg  
 302 intensity in urine and FGS from the onset of this study (Table 2), parasitaemia association has been  
 303 shown to be misleading from several other studies and reports on FGS, particularly when only a single  
 304 urine sample is examined which is usually the case for population-based surveillance[3]. The  
 305 possibility of the presence of FGS in UGS populations has been often raised[6, 23], with projections of  
 306 about 360 million girls and women possibly infected with UGS but today it is thought that at least 56  
 307 million adolescent girls and women are suffering from FGS[24, 25]. Our results maybe show an even  
 308 higher rate of FGS infection amongst the UGS infected population with an approximate FGS/UGS  
 309 ratio of 34/40.

310 From present results, and within the general literature[24, 25], one of such effects noted is an effect on  
 311 menstrual health. More than half of women within the study who reported poor menstrual health (FGS  
 312 = 73.5% ; UGS = 54.6%), either as irregular, painful or seized menstruation, were found to either shed  
 313 eggs in urine (positive for UGS), or were positive for FGS, but without eggs in urine. A significant  
 314 trend was seen with more women positive for FGS reporting abnormal menstruation, than for UGS.

1  
2  
3 315 This confirms recent analysis suggests strong linkages between menstrual health management and  
4  
5 316 FGS[24], an under researched area. In our study post-menarche females already faced a substantial  
6  
7 317 challenge with limited access to hygienic material and information on menstrual health management,  
8  
9 318 typically relying on self made clothes and absorbent plant leaves during menstruation, due to lack of  
10  
11 319 finances or general knowledge. Also an increase (though non-significant) in menstrual abnormality  
12  
13 320 was recorded with increasing age-group, where older adults (36+) experienced more abnormalities  
14  
15 321 than the younger women who in-turn observed higher abnormalities than adolescents. This can be  
16  
17 322 credited to the fact that symptoms perhaps diminished after a while with UGS (maybe as a result of  
18  
19 323 treatment in mass drug administration campaigns), but later resurface with more chronic sequelae of  
20  
21 324 FGS, and with more dire symptoms and negative impact on mental health[24].  
22  
23  
24

25 325 To affirm this, narratives from a previous study which used qualitative probing showed women  
26  
27 326 infected with FGS and not shedding eggs in urine, gave a history of having lived in their earlier years  
28  
29 327 in heavily infested *S.haematobium* foci, which explained their later manifestation of FGS symptoms,  
30  
31 328 even after having moved away to a less infested area, with more than 90% limit in fresh water  
32  
33 329 contact[17]. The significant difference in menstrual abnormalities amongst UGS positive women  
34  
35 330 [n=22(56.4)] and UGS negative women [n=12 (44.4)], alerts to future chronicity of FGS after  
36  
37 331 infection with UGS, especially if not managed with praziquantel treatment(s). This implies the need  
38  
39 332 for early management with more readily available praziquantel treatment for UGS to avoid future risks  
40  
41 333 of FGS[22, 26].  
42  
43

44 334 On its own, lower abdominal pain observed significant association (in adjusted and unadjusted  
45  
46 335 regression models) in both UGS and FGS infections. The chances of having lower abdominal pain  
47  
48 336 was significantly higher in females with either FGS (94.1%) or UGS (84.2%). This reported as key  
49  
50 337 indicator for UGS and FGS, directing early diagnosis of UGS and future FGS in endemic  
51  
52 338 communities, promoting the verticalization of control strategies for both diseases.  
53

54  
55 339 Another trend observed in this study is that intensity of infection or egg patent-prevalence (for UGS)  
56  
57 340 reduces while chronic disease or morbidity for FGS increases as women age. Since women aged  
58  
59 341 (36+), chances of infection with FGS after infection with UGS increased significantly (AOR 6.43,95%

1  
2  
3 342 C.I 1.62-30.35, P=0.0091), similarly reported in other studies in different geographical locations[3, 27-  
4  
5 343 29] and recently in this area[17]. This diverts once small from the two most common hypothesis of age  
6  
7 344 and infection for *S.haematobium* infection[30]; emphasizing on the level of present intensity of  
8  
9 345 infection for UGS, and possible future occurrence of FGS[28, 29].This age-infection association in  
10  
11 346 both UGS and FGS, is highlighted further in the Multivariate model here, where emphasise on  
12  
13 347 infection history for UGS and FGS is seen more clearly. UGS at a younger age will in some cases  
14  
15 348 manifest into FGS when the female is older, causing more intense gynecological symptoms and  
16  
17 349 effects. This offers a possible guiding tool for better control policies, related to early diagnosis and  
18  
19 350 treatment[31, 32]. This surpasses need alone for school-based MDAs, but considers and encourages  
20  
21 351 individual therapy in different contexts for FGS (and MGS)[3]. Also, these results support the  
22  
23 352 advocated need for availability of praziquantel in lowest level (health areas and community) Health  
24  
25 353 Centers for individual therapy[29], as well as treatment from a younger age[25, 26, 32, 33] buoyed  
26  
27 354 with the recent development of pediatric praziquantel[34].  
28  
29  
30

31 355 Although only a few amongst the extensive list of reproductive health determinants were identified in  
32  
33 356 this study to be statistically significant, where mostly reported symptoms were collected, clinical and  
34  
35 357 biological examinations carried out, enabled confirmation of how future self-reported symptoms with  
36  
37 358 UGS and FGS might be best used[17].  
38  
39

40 359

## 43 360 **Conclusion**

44  
45  
46 361 In our chosen study location, which is broadly typical for endemic areas of UGS in Cameroon, strong  
47  
48 362 epidemiological associations between UGS and FGS were found against certain key sexual and  
49  
50 363 reproductive determinants: age, lower abdominal pain and menstrual health. This formative  
51  
52 364 knowledge could be utilised to tackle and ultimately prevent FGS, with a more targeted integrated  
53  
54 365 control for UGS in Cameroon and elsewhere in endemics areas for UGS in sub-Saharan Africa.  
55  
56

57 366

58 367

59

60

1  
2  
3 368 **Supporting Files**  
4

5 369 Supplementary File 1.docx : Structured questionnaire  
6  
7 370  
8  
9

10 371 **Declarations**

11  
12 372 • **Authors' contributions**  
13  
14

15 373 MCM and JRS conceptualized the study and planned the methodology; VAG, MCM, NTM, carried  
16  
17 374 out field investigation; MCM, FNB, JRS, ASO analysed and interpreted the data for this manuscript;  
18  
19 375 MCM acquired funding for study and wrote the original draft of the manuscript; JRS supervised the  
20  
21 376 study and was a major contributor in the conceptualization and writing of the manuscript; FNB, VG,  
22  
23 377 NTM, ASO, reviewed and edited the manuscript. All authors approved the final version of the paper  
24  
25 378 before submission.  
26  
27

28  
29 379 • **Competing interests**  
30  
31

32 380 The authors declare that they have no competing interests.  
33  
34

35 381 • **Funding**  
36  
37

38 382 This study is funded through a fellowship offered by "l'Organisation de Coordination pour la lutte  
39  
40 383 contre les Endémies en Afrique Centrale (OCEAC)", financed by the Ministry for Economic  
41  
42 384 Cooperation and Development (BMZ) of the Federal Republic of Germany, through the KfW (German  
43  
44 385 Development Bank). "Projet Lutte Contre Les Maladies Tropicales Négligées en Afrique Centrale"  
45  
46 386 (MTN) BMZ-Nr 2015.69.227 BMZ 2016.68.797. The funders had no role in study design, data  
47  
48 387 collection and analysis, decision to publish, or preparation of the manuscript.  
49  
50

51 388 • **Data Sharing Statement**  
52  
53

54  
55 389 All data generated or analyzed during this study are included in this published article [and its  
56  
57 390 supplementary files].  
58  
59  
60

1  
2  
3 391 • **Acknowledgements**  
4

5  
6 392 We acknowledge the National Program for the fight against Schistosomiasis and Soil-Transmitted  
7  
8 393 Helminths in Cameroon (PNLSHi), and with gratitude the contribution of Dr Wepnje Godlove in this  
9  
10 394 research. Thanks to all health workers and study participants at the Matta Health Area for their support  
11  
12 395 and sacrifice. We express appreciation to Dr. Savadogo Bonaventure and Dr Patty Ngassa of the  
13  
14 396 MTN-OCEAC Project for their technical advice and Coordination.

15  
16  
17 397 • **License Statement**  
18

19 398 I, the Submitting Author has the right to grant and does grant on behalf of all authors of the Work (as  
20  
21 399 defined in the below author licence), an exclusive licence and/or a non-exclusive licence for  
22  
23 400 contributions from authors who are: i) UK Crown employees; ii) where BMJ has agreed a CC-BY  
24  
25 401 licence shall apply, and/or iii) in accordance with the terms applicable for US Federal Government  
26  
27 402 officers or employees acting as part of their official duties; on a worldwide, perpetual, irrevocable,  
28  
29 403 royalty-free basis to BMJ Publishing Group Ltd (“BMJ”) its licensees and where the relevant Journal  
30  
31 404 is co-owned by BMJ to the co-owners of the Journal, to publish the Work in BMJ Global Health and  
32  
33 405 any other BMJ products and to exploit all rights, as set out in our licence.  
34  
35  
36 406

37  
38 407 The Submitting Author accepts and understands that any supply made under these terms is made by  
39  
40 408 BMJ to the Submitting Author unless you are acting as an employee on behalf of your employer or a  
41  
42 409 postgraduate student of an affiliated institution which is paying any applicable article publishing  
43  
44 410 charge (“APC”) for Open Access articles. Where the Submitting Author wishes to make the Work  
45  
46 411 available on an Open Access basis (and intends to pay the relevant APC), the terms of reuse of such  
47  
48 412 Open Access shall be governed by a Creative Commons licence – details of these licences and  
49  
50 413 which Creative Commons licence will apply to this Work are set out in our licence referred to above.  
51  
52  
53

54 414 • **Consent for publication**  
55

56  
57 415 Written informed consent for publication of clinical details and/or clinical images was obtained from  
58  
59 416 the patients and parents/guardians where needed.  
60

417 **References**

- 418 1. Poggensee G, Kiwelu I, Saria M, et al. Schistosomiasis of the lower reproductive tract without  
419 egg excretion in urine. *Am J Trop Med Hyg.* 1998;59(5):782-3.
- 420 2. Ekpo U, Odeyemi O, Sam-Wobo S, et al. Female genital schistosomiasis (FGS) in Ogun State,  
421 Nigeria: a pilot survey on genital symptoms and clinical findings. *Parasitol Open.* 2017;3:e10.
- 422 3. Kjetland E, Leutscher P, Ndhlovu P. A review of female genital schistosomiasis. *Trends*  
423 *Parasitol.* 2012;28(2):58-65.
- 424 4. Bustinduy AL, Randriansolo B, Sturt AS, et al. An update on female and male genital  
425 schistosomiasis and a call to integrate efforts to escalate diagnosis, treatment and awareness in  
426 endemic and non-endemic settings: The time is now. In: Rollinson D, Stothard R, editors. *Adv*  
427 *Parasitol.* 115: Academic Press; 2022.p.1-44.
- 428 5. Stothard J. Female genital schistosomiasis - icebergs of morbidity ahead? *Trends Parasitol.*  
429 2012;28(5):174-5.
- 430 6. Campbell S, Stothard J, O'Halloran F, et al. Urogenital schistosomiasis and soil-transmitted  
431 helminthiasis (STH) in Cameroon: An epidemiological update at Barombi Mbo and Barombi Kotto  
432 crater lakes assessing prospects for intensified control interventions. *Infect Dis Poverty.* 2017;6(1):49-  
433 49.
- 434 7. King C. Parasites and poverty: the case of schistosomiasis. *Acta Trop.* 2010;113(2):95-104.
- 435 8. Kjetland EF, Mduluzi T, Ndhlovu PD, et al. Genital schistosomiasis in women: a clinical 12-  
436 month in vivo study following treatment with praziquantel. *Trans R Soc Trop Med Hyg.*  
437 2006;100(8):740-52.
- 438 9. World Health Organisation. WHO guideline on control and elimination of human  
439 schistosomiasis. <https://www.who.int/publications/i/item/9789240041608>: WHO; 2022. p.142.  
440 [Accessed 10/03/2022].
- 441 10. SCI Foundation. FAST PACKAGE PROJECT 2021[Available from:  
442 <https://schistosomiasiscontroinitiative.org/projects/fast-research-project> [Accessed 31/01/2022].

- 1  
2  
3 443 11. National Program for the control of Schistosomiasis and intestinal helminthiasis MoPHC.  
4  
5 444 Towards elimination of Schistosomiasis and Soil-transmitted Helminthiasis and in Cameroon: A road  
6  
7 445 map for paradigm shift 2021-2030. MINSANTE, Yaoundé:[Available from  
8  
9 446 <https://www.eliminatestschisto.org/resources/2021-2030-road-map-schistosomiasis-sth->  
10  
11 447 [cameroon](https://www.eliminatestschisto.org/resources/2021-2030-road-map-schistosomiasis-sth-cameroon)]Accessed 12/01/ 2022.  
12  
13 448 12. World Health Organization. Global update on implementation of preventive chemotherapy  
14  
15 449 against neglected tropical diseases in 2018. *Wkly Epidemiol Rec.* 2019;94(38):425-38.  
16  
17 450 13. Crompton DWT, World Health Organization. Preventive chemotherapy in human  
18  
19 451 helminthiasis : coordinated use of antihelminthic drugs in control interventions : a manual for health  
20  
21 452 professionals and programme managers. Geneva: World Health Organization;  
22  
23 453 2006.[<https://apps.who.int/iris/handle/10665/43545>]Accessed 12/02/2022  
24  
25 454 14. National Program for the control of Schistosomiasis and intestinal helminthiasis. Progress  
26  
27 455 Report Cameroon 2013-2019. Yaoundé: MINSANTE;  
28  
29 456 2019.[<https://www.eliminatestschisto.org/resources/cameroon-2003-2019-progress-report-towards->  
30  
31 457 [elimination-of-schistosomiasis-and-sth-in](https://www.eliminatestschisto.org/resources/cameroon-2003-2019-progress-report-towards-elimination-of-schistosomiasis-and-sth-in)]Accessed 13/01/2022.  
32  
33 458 15. Makia C, Ozano K, Tagne M, et al. Achieving equity in UHC interventions: who is left behind  
34  
35 459 by neglected tropical disease programmes in Cameroon? *Glob Health Action.* 2021;14(1):1886457-  
36  
37 460 16. Njunda A, Ndzi E, Assob J, et al. Prevalence and factors associated with urogenital  
38  
39 461 schistosomiasis among primary school children in barrage, Magba sub-division of Cameroon. *BMC*  
40  
41 462 *Public Health.* 2017;17(1):618.  
42  
43 463 17. Masong MC, Wepnje GB, Marlene NT, et al. Female Genital Schistosomiasis (FGS) in  
44  
45 464 Cameroon: A formative epidemiological and socioeconomic investigation in eleven rural fishing  
46  
47 465 communities. *PLOS Glob Public Health.* 2021;1(10):e0000007.  
48  
49 466 18. MINSANTE. Schistosomiasis distribution in Malanteoun Health District NTDmaps.org:  
50  
51 467 MINSANTE; 2018 [Available from: <https://ntdmaps.org/>.]Accessed 2022.  
52  
53 468 19. National Institute of Statistics Cameroon. Socio-economic statistics of Cameroon, 2015  
54  
55 469 Cameroon 2004-2014 [Available from: <https://cameroon.opendataforafrica.org/SESC2015/socio->  
56  
57 470 [economic-statistics-of-cameroon-2015](https://cameroon.opendataforafrica.org/SESC2015/socio-economic-statistics-of-cameroon-2015).Accessed 3/02/2022.  
58  
59  
60

- 1  
2  
3 471 20. WHO. Female Genital Schistosomiasis: A Pocket Atlas for Clinical Health-Care Professionals  
4  
5 472 Geneva: WHO Press; 2015 [Available from: <https://www.who.int/publications/i/item/9789241509299>.  
6  
7 473 Accessed 13/01/2022  
8  
9 474 21. Treatment of Female Genital Schistosomiasis (FGS) With Praziquantel: A Proof-of-Concept  
10  
11 475 Study (NCT04115072) [Available from: <https://clinicaltrials.gov/ct2/show/NCT04115072>]. NIH:  
12  
13 476 ClinicalTrials.gov archive. 2020[cited 31/01/2022].  
14  
15 477 22. Nour NM. Schistosomiasis: health effects on women. *Rev Obstet Gynecol*. 2010;3(1):28-32.  
16  
17 478 23. Christinet V, Lazdins-Helds J, Stothard J, et al. Female genital schistosomiasis (FGS): from  
18  
19 479 case reports to a call for concerted action against this neglected gynecological disease. *Int J Parasitol*.  
20  
21 480 2016;46(7):395-404.  
22  
23 481 24. Stothard JR, Odiere MR, Phillips-Howard PA. Connecting Female Genital Schistosomiasis  
24  
25 482 and Menstrual Hygiene Initiatives. *Trends Parasitol*. 2020;38(5).  
26  
27 483 25. UNAIDS. 'No more neglect: Female genital schistosomiasis and HIV'.  
28  
29 484 [www.unaids.org/en/resources/documents/2019/](http://www.unaids.org/en/resources/documents/2019/): UNAIDS; 2019. Accessed 13/01/2022.  
30  
31 485 26. Bustinduy AL, Friedman JF, Kjetland EF, et al. Expanding Praziquantel (PZQ) Access beyond  
32  
33 486 Mass Drug Administration Programs: Paving a Way Forward for a Pediatric PZQ Formulation for  
34  
35 487 Schistosomiasis. *PLoS Negl Trop Dis*. 2016;10(9):e0004946.  
36  
37 488 27. Chetty A, Omondi MA, Butters C, et al. Impact of Helminth Infections on Female  
38  
39 489 Reproductive Health and Associated Diseases. *Front Immunol*. 2020;11:577516.  
40  
41 490 28. Hegertun I, Gundersen S, Kleppa E, et al. *S. haematobium* as a common cause of genital  
42  
43 491 morbidity in girls: a cross-sectional study of children in South Africa. *PLoS Negl Trop Dis*.  
44  
45 492 2013;7(3):e2104.  
46  
47 493 29. Stothard JR, Stanton, M, Bustinduy, A, et al. Diagnostics for schistosomiasis in Africa and  
48  
49 494 Arabia: A review of present options in control and future needs for elimination. *Parasitology*.  
50  
51 495 2014(141):1947-61.  
52  
53 496 30. Feldmeier H, Poggensee G, Krantz I. Puberty and Age-intensity Profiles in Schistosome  
54  
55 497 Infections: Another Hypothesis. *Parasitol Today*. 1998;14(10):435;  
56  
57  
58  
59  
60



- 1  
2  
3 498 31. Richardson ST, Franklin AL, Rome ES, et al. Global Health: Urogenital Schistosomiasis in  
4  
5 499 the Adolescent Girl. *J Pediatr Adolesc Gynecol*. 2016;29(4):326-32.  
6  
7 500 32. Deworming adolescent girls and women of reproductive age. Policy Brief [press release].  
8  
9 501 Geneva: WHO 2022. [Available from:  
10  
11 502 <https://www.who.int/publications/i/item/9789240037670>] Accessed 11/03/2022.  
12  
13 503 33. Faust CL, Osakunor DNM, Downs JA, et al. Schistosomiasis Control: Leave No Age Group  
14  
15 504 Behind. *Trends Parasitol*. 2020;36(7):582-91.  
16  
17 505 34. Pediatric Praziquantel Consortium. Contract manufacturing agreement signed for production  
18  
19 506 of new pediatric treatment for schistosomiasis 2021 [Available from:  
20  
21 507 <http://https://www.pediatricpraziquantelconsortium.org/> Accessed 10/01/2022.  
22  
23  
24  
25  
26  
27

28 509 • **Figure Legends**

29  
30 510 **Figure 1:** Study participant selection criteria and numbers with diagnostic methods flow

31  
32 511 **Figure 2 :** Imagery of FGS pathology of the cervix with reported lesions (magnification of x4)

33  
34 512 **A)** 1-rubbery papule, 2-abnormal blood vessel, 3- homogeneous sandy patch (30 year old woman, +UGS,  
35 513 +lower abdominal pain, +Menstrual irregularity) ; **B)** 1,2- grainy sandy patches (45 year old woman, -UGS,  
36 514 +lower abdominal pain ; +Menstrual irregularity)  
37

38 515

39  
40 516

41  
42 517

43  
44 518

45  
46 519  
47  
48  
49  
50  
51  
52  
53  
54  
55  
56  
57  
58  
59  
60

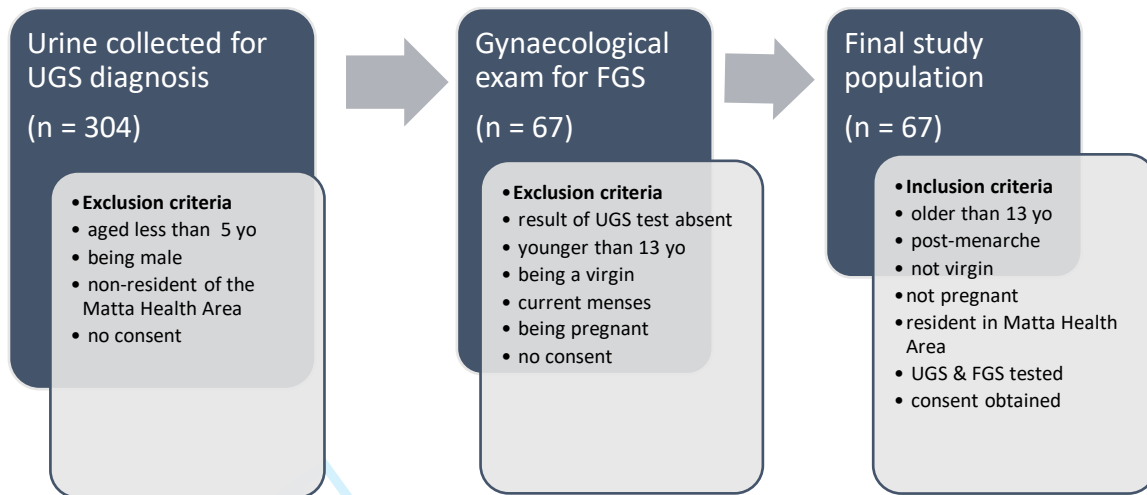

1  
2  
3  
4  
5  
6  
7  
8  
9  
10  
11  
12  
13  
14  
15  
16  
17  
18  
19  
20  
21  
22  
23  
24  
25  
26  
27  
28  
29  
30  
31  
32  
33  
34  
35  
36  
37  
38  
39  
40  
41  
42  
43  
44  
45  
46  
47  
48  
49  
50  
51  
52  
53  
54  
55  
56  
57  
58  
59  
60

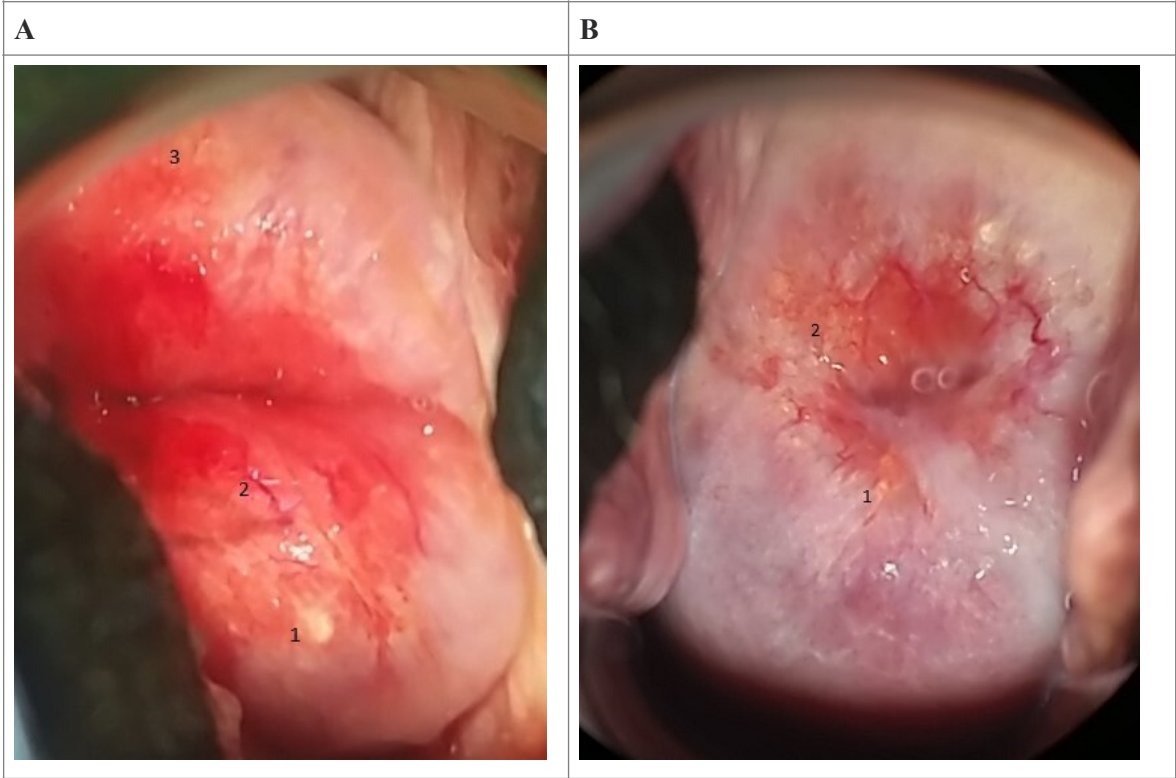

## Supplementary File 1

Close-ended structured questionnaire**A. Close ended structured questionnaire– Administered directly in English with oral translations into Fulbe, Kotoko, Mosgum, and Arab**

Name of Community: \_\_\_\_\_

Age (years): \_\_\_\_\_

Education: Informal education ( ) Formal education ( ) (specify) \_\_\_\_\_

Marital Status: Single ( ) Married ( ) Separated ( ) Widowed ( )

No of years having lived in community \_\_\_\_\_

Previous community \_\_\_\_\_

Economic activity-----

Residence ----- (collect coordinates)

**Questions on symptoms of urinary tract schistosomiasis; FGS; OR STI**

1. Do you see your menses? Yes ( ) No ( )
2. Did you observe/experience your menses within the last two weeks? Yes ( ) No ( ) Does your menses come every month? Regular?
3. Is your menses painful? \_\_\_\_\_(pain during menstruation – always very painful, sometimes painful, normal) Irregular? \_\_\_\_\_(every month?, not every month, stopped)
4. Do you have pain in your lower abdomen? When? For how long?
5. Do you have pain when urinating? Yes ( ) No ( )
6. Do you have difficulty in urinating (urine not coming out fluently)? Yes ( ) No ( )
7. Do you have sudden uncontrollable and unexpected urge to urinate and mostly cannot hold it? Even when you cough it comes out? Yes ( ) No ( )
8. Do you see blood in your urine? Yes ( ) No ( )
9. (If yes) When did you lastly see blood in your urine? \_\_\_\_\_Always, sometimes, Once in a while
10. Do you sometimes haveitching in your private part?Yes ( ) No ( )
11. How often do you experience this? Once a while ( ) frequently ( )/ When was the last time?
12. Do you have a feeling of burning within your private part? Yes ( ) No ( )

1  
2  
3 13. How often do you experience this? Once a while ( ) Frequently ( )  
4

5 14. Do you sense a swelling/lumps within your private part? Yes ( ) No ( ) No response ( )  
6

7 15. Do you have any discharge that comes from your vagina? Yes ( ) No ( ) Does it have an odour?  
8

9 \_\_\_\_\_ Do you see the colour? Yes ( ) No ( ) What Color is it? White; grey; green/yellow;  
10

11 brown  
12

13 16. Do you think this is normal? Yes ( ) No ( ) Do not know ( ). When did you start observing the  
14 discharge? Date \_\_\_\_\_  
15

16 17. After sexual intercourse do you have a discharge? Yes ( ) No ( ) Is it smelly? Yes ( ) No ( ) Do not  
17 know ( )  
18

19 18. After or during sexual intercourse do you have pain? Yes ( ) No ( ) I do not know ( ) ; Do  
20 you have a bloody discharge? Yes ( ) No ( ) I do not know ( )  
21

22 19. Have you had any miscarriages /pregnancies that passed? Yes ( ) No ( )  
23

24 20. How many? ( )  
25

26 21. Do you have children? Yes ( ) No ( )  
27

28 22. What age is your last child? ( )  
29

30 23. Have you visited the clinic to complain about these issues? Yes ( ) No ( )  
31

32 24. What you used/taken/done to treat any of these problems? \_\_\_\_\_ (Underline) Hospital  
33 or drug store/ local midwife/ traditional medicine/ prayers/ none of the above (what other?  
34 Specify)/nothing  
35  
36

### 37 **Water contact History**

38 1. Where do you fetch your household water? Lake; other source (name) \_\_\_\_\_  
39

40 2. Do you fish in the lake? Yes ( ), No ( )  
41

42 3. Do you bathe in the lake? Yes ( ), No ( )  
43

44 4. What do you use the lake for? ( ) \_\_\_\_\_  
45  
46  
47  
48  
49  
50  
51  
52  
53  
54  
55  
56  
57  
58  
59  
60

# BMJ Open

## Urogenital Schistosomiasis (UGS) and Female Genital Schistosomiasis (FGS) in Cameroon: An observational assessment of key reproductive health determinants of girls and women in the Matta Health Area

|                                 |                                                                                                                                                                                                                                                                                                                                                                                                                                                                                                                                                                                                          |
|---------------------------------|----------------------------------------------------------------------------------------------------------------------------------------------------------------------------------------------------------------------------------------------------------------------------------------------------------------------------------------------------------------------------------------------------------------------------------------------------------------------------------------------------------------------------------------------------------------------------------------------------------|
| Journal:                        | <i>BMJ Open</i>                                                                                                                                                                                                                                                                                                                                                                                                                                                                                                                                                                                          |
| Manuscript ID                   | bmjopen-2022-063392.R1                                                                                                                                                                                                                                                                                                                                                                                                                                                                                                                                                                                   |
| Article Type:                   | Original research                                                                                                                                                                                                                                                                                                                                                                                                                                                                                                                                                                                        |
| Date Submitted by the Author:   | 19-Aug-2022                                                                                                                                                                                                                                                                                                                                                                                                                                                                                                                                                                                              |
| Complete List of Authors:       | Makia, Christine Masong; Catholic University of Central Africa, Social Sciences and Management<br>Fesuh, Nono Bertrand; National Advanced School of Engineering, University of Yaoundé 1, Cameroon, Department of Mathematics and Physical Sciences<br>Amabo, Elvis; Malanteoun Health District<br>Gamba, Victoria A; University of Nairobi, Department of Obstetrics and Gynecology<br>Oluwole, Akinola Stephen; Federal University of Agriculture Abeokuta, Department of Pure and Applied Zoology<br>Stothard, Russell; Liverpool School of Tropical Medicine, Department of Tropical Disease Biology |
| <b>Primary Subject Heading</b>: | Public health                                                                                                                                                                                                                                                                                                                                                                                                                                                                                                                                                                                            |
| Secondary Subject Heading:      | Infectious diseases, Epidemiology                                                                                                                                                                                                                                                                                                                                                                                                                                                                                                                                                                        |
| Keywords:                       | Epidemiology < TROPICAL MEDICINE, PARASITOLOGY, Colposcopy < GYNAECOLOGY, Infection control < INFECTIOUS DISEASES                                                                                                                                                                                                                                                                                                                                                                                                                                                                                        |
|                                 |                                                                                                                                                                                                                                                                                                                                                                                                                                                                                                                                                                                                          |

SCHOLARONE™  
Manuscripts

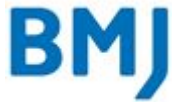

I, the Submitting Author has the right to grant and does grant on behalf of all authors of the Work (as defined in the below author licence), an exclusive licence and/or a non-exclusive licence for contributions from authors who are: i) UK Crown employees; ii) where BMJ has agreed a CC-BY licence shall apply, and/or iii) in accordance with the terms applicable for US Federal Government officers or employees acting as part of their official duties; on a worldwide, perpetual, irrevocable, royalty-free basis to BMJ Publishing Group Ltd ("BMJ") its licensees and where the relevant Journal is co-owned by BMJ to the co-owners of the Journal, to publish the Work in this journal and any other BMJ products and to exploit all rights, as set out in our [licence](#).

The Submitting Author accepts and understands that any supply made under these terms is made by BMJ to the Submitting Author unless you are acting as an employee on behalf of your employer or a postgraduate student of an affiliated institution which is paying any applicable article publishing charge ("APC") for Open Access articles. Where the Submitting Author wishes to make the Work available on an Open Access basis (and intends to pay the relevant APC), the terms of reuse of such Open Access shall be governed by a Creative Commons licence – details of these licences and which [Creative Commons](#) licence will apply to this Work are set out in our licence referred to above.

Other than as permitted in any relevant BMJ Author's Self Archiving Policies, I confirm this Work has not been accepted for publication elsewhere, is not being considered for publication elsewhere and does not duplicate material already published. I confirm all authors consent to publication of this Work and authorise the granting of this licence.

1  
2  
3 1 **Title:** Urogenital Schistosomiasis (UGS) and Female Genital Schistosomiasis (FGS) in Cameroon: An  
4 2 observational assessment of key reproductive health determinants of girls and women in the Matta  
5 3 Health Area  
6  
7  
8  
9 4

10 5 **Authors:** Makia Christine Masong<sup>1\*</sup>, Fesuh Nono Bertrand<sup>2</sup>, Amabo Elvis Ngwa<sup>3</sup>, Victoria A. Gamba<sup>4</sup>,  
11 6 Akinola Stephen Oluwole<sup>5</sup>, J. Russell Stothard<sup>6</sup>  
12  
13  
14  
15 7

16  
17  
18 8 <sup>1</sup>Department of Social Sciences and Management, Catholic University of Central Africa, Yaoundé,  
19 9 Cameroon  
20  
21

22  
23 10 <sup>2</sup>Department of Mathematics and Physical Sciences, National Advanced School of Engineering,  
24 11 University of Yaoundé 1, Cameroon  
25  
26

27 12 <sup>3</sup>Malanteoun Health District, Malanteoun, Cameroon  
28  
29

30 13 <sup>4</sup>Department of Obstetrics and Gynecology, University of Nairobi, Nairobi, Kenya  
31  
32

33 14 <sup>5</sup>Department of Pure and Applied Zoology, Federal University of Agriculture, Abeokuta, Nigeria  
34  
35

36 15 <sup>6</sup>Department of Tropical Disease Biology, Liverpool School of Tropical Medicine, Liverpool, L3 5QA,  
37 16 UK  
38  
39

40 17  
41  
42  
43 18 **\*Corresponding author**

44  
45 19 Makia Christine Masong  
46

47 20 Department of Social Sciences and Management, Catholic University of Central Africa, Yaoundé, Cameroon  
48

49 21 Projet MTN/OCEAC  
50

51 22 [masongbye@yahoo.com](mailto:masongbye@yahoo.com)  
52  
53

54 23  
55

56 24  
57

58 25  
59  
60



1  
2  
3 26 **Abstract**  
4

5 27 **Objectives and Setting:** Across sub-Saharan Africa, Urogenital Schistosomiasis (UGS), in particular  
6  
7 28 Female Genital Schistosomiasis (FGS) is a significant waterborne parasitic disease, with its direct  
8  
9 29 burden upon the sexual and reproductive health (SRH) of sufferers infrequently measured. UGS has an  
10  
11 30 established control plan, which in most endemic regions as in Cameroon, still excludes FGS  
12  
13 31 considerations. Highlighting existent associations between UGS and FGS could increase the  
14  
15 32 management of FGS within UGS interventions. This study seeks to identify current associations  
16  
17 33 amongst FGS and UGS with some reproductive health indicators, to provide formative information for  
18  
19 34 better integrated control.  
20  
21  
22

23 35 **Participants:** 304 females aged 5- 69 years, were all examined for UGS by urine filtration and  
24  
25 36 microscopy. Amongst these, 192 women and girls were eligible for FGS assessment based on age (>13).  
26  
27 37 After questioning for FGS symptoms, a sub-group of 67 women and girls from this population consented  
28  
29 38 for clinical assessment for FGS through application of portable colposcopy, with observed sequelae  
30  
31 39 classified according to the WHO FGS pocket atlas.  
32  
33

34 40 **Outcome:** Overall UGS and FGS prevalence was measured, with FGS/UGS related reproductive health  
35  
36 41 symptoms recorded. Epidemiological associations with FGS and UGS were investigated by univariate  
37  
38 42 and multivariate logistic regression analyses.  
39  
40

41 43 **Results:** Overall UGS prevalence was 63.8% (194/304), where FGS prevalence (sub group) was 50.7%  
42  
43 44 (34/67). FGS increased significantly with increasing age, whilst a non-significant decrease with  
44  
45 45 descending age was observed for UGS. Lower abdominal pain (LAP) vaginal itches (VI), and coital  
46  
47 46 pain (CP), were identified as the main significant shared symptoms of both FGS and UGS, while LAP  
48  
49 47 with MI appeared a strong epidemiological flag for FGS.  
50  
51

52 48 **Conclusion:** LAP, MI, CP and VI provide under-explored dimensions in SRH that could be exploited  
53  
54 49 in future for targeting of praziquantel provision to FGS sufferers within primary care, complementary  
55  
56 50 with existing distribution for UGS sufferers in *S. haematobium* endemic areas.  
57  
58  
59  
60

1  
2  
3 51 **Keywords:** *Schistosoma haematobium*, SRH, clinical colposcopy, questionnaires, menstrual health,  
4  
5 52 abdominal pain  
6  
7  
8 53  
9

10  
11 54 **Strengths and Limitations of this study**  
12

13 55 - Using clinical colposcopy, a not very common tool within primary health care settings in sub-Saharan  
14 56 Africa, combined with an analysis of sexual and reproductive health determinants, we identify existing  
15 57 relationships with symptoms of FGS and UGS affecting the sexual and reproductive health of women  
16 58 in sub-Saharan Africa, which could inform the development of a simple questionnaire approach to better  
17 59 capture FGS sufferers within endemic areas for UGS.  
20

21  
22 60 - Here, formative evidence is provided with initial recommendations, towards developing better  
23 61 national surveillance and control of FGS, thereby better empowering women's health within low  
24 62 resource settings, especially where schistosomiasis is endemic.  
25  
26  
27

28 63 - This study did not consider clinical diagnosis of girls younger than 14, especially as non-invasive  
29 64 clinical diagnostic tools are lacking for examination amongst this age group within low resource  
30 65 schistosomiasis endemic communities.  
31  
32

33 66 - Assessment for STIs amongst participants are not presented here, where such results could complement  
34 67 or clarify FGS diagnosis, considering most sexual and reproductive health related symptoms for  
35 68 urogenital schistosomiasis present as sexually transmitted infections, and can be misdiagnosed.  
36  
37  
38  
39  
40  
41  
42  
43  
44  
45  
46  
47  
48  
49  
50  
51  
52  
53  
54

55 77 **Introduction**  
56

57 78 In endemic areas, a definitive diagnosis of Urogenital schistosomiasis (UGS) is established by  
58 79 demonstration of viable *Schistosoma (S) haematobium* eggs ( $\geq 1$ ) in urine and/haematuria[1, 2], whilst

1  
2  
3 80 female genital schistosomiasis (FGS) can be diagnosed visually for *S. haematobium* induced cervical  
4  
5 81 lesions and small fibrotic nodules known as “sandy patches”[2, 3], either with the presence or absence  
6  
7 82 of *S. haematobium* eggs in urine[1, 4, 5]. Whilst both FGS and UGS are caused by infection with  
8  
9 83 *Schistosoma haematobium*[1, 6-8] a waterborne blood fluke, each appear to have some unclear  
10  
11 84 epidemiological associations, largely due to insufficient disease surveillance[4, 5, 9, 10]. In sub-Saharan  
12  
13 85 Africa where UGS is endemic and can be highly prevalent (>50%)[11, 12], insufficient or infrequent  
14  
15 86 efforts have been undertaken to document FGS specifically[10, 13-15], partly as the clinical skills to do  
16  
17 87 so are lacking and uninformed within primary care[9]. While active UGS does not readily predict  
18  
19 88 FGS[4], since FGS can occur without the direct presence of schistosome eggs in urine (a cardinal  
20  
21 89 diagnostic for UGS)[15, 16], rather FGS often presents with a more chronic time frame where  
22  
23 90 schistosome eggs are trapped within the cervico-vaginal surfaces[4, 17, 18]. For some, these trapped  
24  
25 91 eggs can accumulate from very early on in life[7], with enduring and typically hidden sequelae[17, 19].  
26  
27 92 Based on several biological determinants such as age[7], the mucosal damage and fibrotic scarring of  
28  
29 93 the vaginal and cervical surfaces from FGS proceeds with increasing duration of UGS infection(s)[4];  
30  
31 94 moreover, FGS-specific sequelae maybe slow to resolve upon standard antiparasitic treatment of  
32  
33 95 UGS[20, 21], i.e., single annual administration of praziquantel at 40mg/g as used in public health  
34  
35 96 campaigns[4, 17].  
36  
37  
38  
39  
40  
41 97 In many parts of Africa where surveillance of UGS is limited[22] and that for FGS largely absent[12,  
42  
43 98 23], there is a clear need to better understand the epidemiological associations between UGS and  
44  
45 99 FGS[11]. Particularly so, to support earlier diagnosis of cases of FGS, and individualize praziquantel  
46  
47 100 treatment needs (for individual and context specific case management)[12, 24] to better avert their  
48  
49 101 disease progression[12]; as current interventions against UGS do not specifically target adolescent girls  
50  
51 102 or women[20, 25]. This gap in treatment coverage[24] also has considerable bearing on progress towards  
52  
53 103 elimination of schistosomiasis transmission within disease endemic communities[25].  
54  
55  
56  
57  
58 104 In recent years, FGS focused research and public health education[26] has gained traction in certain  
59  
60 105 countries such as Ghana, Tanzania, Madagascar and Mozambique[6, 8], although other countries such

1  
2  
3 106 as Cameroon, currently lag behind[27, 28] Schistosomiasis exists in several regions of Cameroon[29],  
4  
5 107 affecting over 10 million people in rural and urban areas[30]. The country has a national coordinated  
6  
7 108 control plan for fairly early interventions during child-hood years (from 5 – 14 years old)[31], which  
8  
9  
10 109 take advantage of school based intervention platforms[32, 33], and in certain settings, with community  
11  
12 110 based interventions, where their at-risk status (people or communities dependent on Schistosomiasis  
13  
14 111 endemic water bodies, for main water source) is high[18, 27, 31, 34, 35]. Even with improved (>70%)  
15  
16 112 helminth control amongst children in the last decade [30], some of the adolescent at-risk populations  
17  
18 113 do not always benefit from praziquantel treatment due to existing policy gaps and program intervention  
19  
20 114 challenges [[12, 36, 37].

21  
22  
23 115 To address this treatment deficit, capture missed opportunities, and ensure the consideration and  
24  
25 116 apprehension of ensuing FGS manifestations within such already identified sub-groups (young girls  
26  
27 117 and women); with better knowledge on the precise associations between UGS and FGS, future control  
28  
29 118 policies and intervention campaigns can be revised to better target at-risk populations.

30  
31 119 Here, we sought to clarify existing associations between FGS and UGS, highlighting cardinal  
32  
33 120 symptomologies for scalable detection and targeted control of FGS within UGS endemic areas. This  
34  
35 121 supports the need for a future integrated approach for control of Schistosomiasis and limits the “gap”  
36  
37 122 concerning FGS surveillance within current primary care.

38  
39  
40 123

41  
42 124

43  
44 125

45  
46 126

47  
48 127

49  
50 128

## 51 52 129 **Materials and Methods**

### 53 54 55 130 **Ethics approval and consent to participate**

56  
57  
58 131 Ethical clearance for this study was provided by the Cameroon National Ethics committee on Human  
59  
60 132 Health Research (Ref N ° 2020/07/1266/CE/CNERSH/SP), with administrative authorizations from

1  
2  
3 133 both the Regional Delegation of Public Health for the West region of Cameroon (Ref N°  
4  
5 134 679/L/MINSANTE/SG/DRSPO/CBF), and the district Health Office of the Malanteoun Health District  
6  
7 135 (Ref N° 078/L/MINSANTE/DRSPO/DSMLT). Informed written and oral consent was obtained from  
8  
9 136 all participants for parasitological and gynecological examinations. For participants <18 years, parents,  
10  
11 137 husbands, or guardian gave informed permission and assent was obtained from the participants. Privacy  
12  
13 138 and confidentiality of medical information were protected during and after the study.

### 16 139 **Patient and Public Involvement**

19 140 We followed inclusive and participative methods to get overall participant and public involvement,  
20  
21 141 where tailored visits for data collection were carried out according to best practices with local  
22  
23 142 engagement of key community members and local health workers.

### 26 143 **Study Setting**

29 144 This study was carried out across a group of girls and women residing in remote communities in the  
30  
31 145 Matta Health Area in the West Region of Cameroon, around the Mape Dam, a known transmission focus  
32  
33 146 for *Schistosoma haematobium*[30, 35]. Most study participants were involved actively in fishing or  
34  
35 147 other household activity that put them in constant contact with the lake water[28]. More than 90% of  
36  
37 148 the population lived less than 200m to an endemic water source (the Mape Dam) and more than 75%  
38  
39 149 depended fully on the Mape Dam for house-hold water and for an income generating activity (fishing)  
40  
41 150 [28, 35]. Of note, the Matta Health Area hosts several remote fishing island communities that surround  
42  
43 151 the man-made barrage (Mape Dam), and for at least 18 years has witnessed high transmission of *S.*  
44  
45 152 *haematobium* with prevalence of UGS in children greater than 50%[38].

### 49 153 **Study Design and Procedures**

51 154 This cross-sectional study was conducted between the periods of December 2020 to June 2021. The total  
52  
53 155 population estimate of the study site was 5,000 people[39], where women represented 51.0% of the  
54  
55 156 population, with the age group 15-64 years representing 54.6% of the total population. With no existing  
56  
57 157 records of schistosomiasis prevalence amongst adults within the Matta Health area, a hypothesis of UGS  
58  
59 158 endemicity amongst adults was based on recorded school-age Schistosomiasis prevalence (> 41% in the

1  
2  
3 159 last decade) and within the Matta health Area [35, 38, 40]. Based on lake proximity and economic  
4  
5 160 activity, 11 main communities were visited within the Matta Health Area: nine secluded water-locked  
6  
7 161 fishing communities (Islands/fishing camps) with habitations mostly less than 200m from the lake; and  
8  
9 162 two mainland communities (land-locked) with habitation more than 400m from the lake[28]. Following  
10  
11 163 a simple random sampling technique, on the base of attaining a precision rate of 95% with an error  
12  
13 164 margin of 5%, our initial sample size was estimated statistically using the population proportion  
14  
15 165 formula[41] $n = N * X / (X + N - 1)$ , where,  $X = Z_{\alpha/2} \sqrt{p * (1-p) / MOE^2}$ , and  $Z_{\alpha/2}$  is the critical value  
16  
17 166 of the normal distribution at  $\alpha/2$  (for confidence level of 95%,  $\alpha$  is 0.05 and critical value is 1.96), MOE  
18  
19 167 is the margin of error (5%),  $p$  is the sample proportion (55%), and  $N$  is the population size (1400)[28].  
20  
21  
22 168 The Finite Population Correction has been applied to the sample size formula.  
23  
24  
25 169 Thus,  $n = 1400 * 3.8 / (3.8 + 1400 - 1)$ , with  $n = 387$ . With an originally determined sample size of 387,  
26  
27 170 due to logistic and cultural constraints, 304 (78.55%) of target recruitment was reached [28]. Due to the  
28  
29 171 secluded nature of study communities (far from health care setting), and the preference of a participative  
30  
31 172 nature for recruiting (involvement of formal/informal health workers and some community members),  
32  
33 173 recruitment was contextualized within each community as per the propositions of key community  
34  
35 174 members (including participants themselves). Of the 304 participants sampled and tested for UGS, 193  
36  
37 175 girls and women were eligible for FGS assessment (Figure 1). Eligibility criteria for clinical FGS  
38  
39 176 diagnosis consisted: >13, non-virgin, not menstruating, not pregnant, and consent/assent from parent or  
40  
41 177 spouse for girls younger than 18. Based on eligibility criteria, participant availability, and logistics  
42  
43 178 constraints, a final sub-group of 67 women and girls were assessed clinically for FGS (Figure 1). Thus,  
44  
45 179 within this sub-group, after questioning (questionnaire), consenting participants underwent  
46  
47 180 gynecological examination by colposcopy with photo documentation by a trained gynecologist and  
48  
49 181 midwife, with previous experience in diagnosing FGS. All participants were recruited and screened  
50  
51 182 within the community, mostly in their homes or a 'safe' house prescribed by the women themselves, or  
52  
53 183 the village leader.  
54  
55  
56  
57  
58  
59  
60

185 **Figure 1: Study participant selection criteria and numbers with diagnostic methods flow**

186

187 After UGS assessment, for girls and women older than 13, a structured questionnaire (see  
188 Supplementary File 1) with FGS related symptoms[28], sexual and reproductive health, and socio-  
189 demographic questions, was administered privately in a one-to-one format. On average interviews were  
190 completed during 35 minutes and were conducted after the urine was collected from each study  
191 participant. Participants responded to the structured questionnaire and were prompted to discuss further  
192 on related symptoms if they wished to share.

193 Sexual and reproductive health related questions included: sexual activeness, (with age of first encounter  
194 or age at marriage), number of children, age of last child, any miscarriage, menstrual irregularities or  
195 abnormalities, abdominal pain, coital pain, and vaginal itches with abnormal discharges. Demographic  
196 questions asked included: age, level of formal or informal schooling achieved, water contact activities,  
197 and income generating activities. Most females encountered were married by age14, which helped guide  
198 the minimum age for the study, in terms of in deciphering a general baseline for assessing girls for FGS  
199 (through general sexual health related questions, and invasive gynecological examination) for FGS.  
200 Also, age at marriage was used to determine/suggest sub-fertility amongst participants as the age of first  
201 child, last child and presence or absence of children was deciphered from the number of years in  
202 marriage (or being sexually active)[28, 42]. To better explore age-related profiles, three age groups were  
203 formed around these context specific sexual and reproductive health characteristics: adolescence (14-  
204 19), young adults (20-35) and older adults (36+).

205

### 206 **Parasitological and Gynecological Examinations**

207 Dipstick diagnosis of microscopic haematuria[43], and urine syringe filtration technique with  
208 microscopic-based poly-carbonate filter examination for urinary eggs, were used on a single urine  
209 sample for standard UGS detection within this study. At least 10 ml of urine was collected and observed  
210 for macrohaematuria, tested for microhaematuria and proteinuria with reagent strips (Siemens Multistix

1  
2  
3 211 10 SG), then analyzed for *S. haematobium* eggs, at the local health center laboratory on the same day of  
4  
5 212 collection. Microscopy for visualization of schistosome eggs was performed by x100 using a light  
6  
7 213 compound and stained with Lugol's iodine. A urine sample was deemed positive for UGS on the  
8  
9 214 presence of haematuria[44] with at least one terminal-spined ovum seen[45], and the number of ova  
10  
11 215 reported as per  $\geq 50$  (high intensity) or  $< 50$  (low intensity)[46]. Next, consenting eligible girls and  
12  
13 216 women were examined by clinical colposcopy with photo-documentation, using a hand held colposcope  
14  
15 217 (EVA COLPO, Mobile ODT). The obtained images were cross-checked against the WHO FGS pocket  
16  
17 218 atlas[2] to record key sequelae. These were then saved in a coded database for the internal validation  
18  
19 219 through blinded evaluation of cervical images from photo-colposcopy by external team members, after  
20  
21 220 the cross examination with the WHO Pocket atlas. A minimal clinical indication for FGS was  
22  
23 221 determined upon the presence of sandy patches, abnormal blood vessels and/or sandy patches on  
24  
25 222 homogenous yellow areas, in line with the WHO FGS pocket atlas coding[2] after cross verification by  
26  
27 223 external team members  
28  
29  
30  
31 224 .  
32  
33

### 34 225 **Statistical Analysis**

35  
36 226 All numerical data on females examined were extracted from the main database in Excel, and imported  
37  
38 227 into the R (version 4.0.2) software for statistical analyses. In univariate analysis, frequencies and  
39  
40 228 proportions were reported for socio-demographic, syndromic and clinical variables. In bivariate  
41  
42 229 analysis, Pearson's chi-squared tests were used to test the dependence of socio-demographic, clinical  
43  
44 230 and syndromic reproductive health related independent variables against the dependent variables FGS  
45  
46 231 and UGS. To further highlight such dependence, univariate logistic regression analyses was used, with  
47  
48 232 the results presented in the form of unadjusted odds ratios. To identify most relevant variables amongst  
49  
50 233 the reproductive health related independent variables associated to each of UGS and FGS, multivariate  
51  
52 234 logistic regressions analyses were used, with the results presented in the form of adjusted odds ratios  
53  
54 235 (AOR), alongside 95% confidence intervals (CI) and *p*-values based on the Wald's Test. To fit the  
55  
56 236 models, only factors significantly related to the outcomes at a 25% level of significance in the univariate  
57  
58 237 models were included. Multicollinearity between independent variables in the initial multivariate  
59  
60



238 models were evaluated using the `vif` function in the `car` R package and our knowledge on how the  
239 variables were measured. The `step` function in the R package `stats` was applied to the resulting  
240 multivariate models after correcting for multicollinearity to select the “best” fitting model. The global  
241 significance of variables in the final models were evaluated based on analysis of deviance tables using  
242 the `anova` function in the `stats` R package. In all, the level of significance was set at  $p$ -value  $<0.05$ .

243

## 244 Results

### 245 A. General participant characteristics

246 A total sample population of 304 females were met, aged from 5 to 69 years old (192 of reproductive  
247 age,  $>13$  and  $<70$ , with mean $\pm$ SD age of  $28 \pm 12.7$ ). Also, 88.16% of participants were dependent  
248 on, and lived within a proximity of  $\leq 200$ m to the Mape lake (Island communities), and the remaining  
249 11.82% came from Mainland communities, which were further from the lake ( $>400$ m), having  
250 alternative water sources (wells and stand taps), and involved in farming alone without fishing activities.  
251 Furthermore, 28.29% showed proteinuria, and a 50.0% prevalence (152) was recorded for  
252 microhematuria, with a specificity and sensitivity of 74.5% (95% CI: 67.1 – 80.8) and 74.8% (95% CI:  
253 67.4 – 81.1) respectively. The Geometric Mean Egg (GME) count was 33.1 (Range: 2 – 1220) among  
254 which 36.2% had heavy ( $\geq 50$  eggs/10ml of urine) infection while 63.8% had light ( $> 50$  eggs/10ml of  
255 urine) infection. Macrohematuria was strongly related to egg density categories ( $\chi^2 = 17.7$ ;  $P < 0.001$ ),  
256 where cases of macrohematuria were directly related to heavy egg load (93.2%). Information related  
257 to sub fertility/infertility was captured based on age at marriage, number of children and the age of last  
258 child, with more than half of the study population reporting not having received treatment with  
259 praziquantel in more than a year (see Table 1). Reported sexual and reproductive health syndromes  
260 showed lower miscarriages (58.89%), abdominal pain (56.95%), lower back pain (44.59%), coital pain  
261 (45.98%), coital bleeding (37.93), vaginal itches (68%), abnormal vaginal discharge (42.6%) and  
262 menstrual irregularities (47.74%) to be comparatively higher amongst participants, compared to and  
263 stress incontinence (19.47) (see Table 1).

264 Table 1: General characteristics of all study participants (Sociodemographic, syndromic, clinical)

| Variable                    | Category                                          | Number of Women | Percentage |
|-----------------------------|---------------------------------------------------|-----------------|------------|
| <b>1. Demographic</b>       |                                                   |                 |            |
| Age (groups)                | 0 <14                                             | 111             | 36.51      |
|                             | 1[14-19]                                          | 62              | 20.39      |
|                             | 2[20-35]                                          | 83              | 27.3       |
|                             | 36+                                               | 48              | 15.79      |
| Age at marriage             | 13-15                                             | 71              | 39.89      |
|                             | 15-17                                             | 88              | 49.44      |
|                             | 18+                                               | 19              | 10.67      |
| No of Children              | 0                                                 | 44              | 24.31      |
|                             | 1[1-3]                                            | 72              | 39.78      |
|                             | 2[4-6]                                            | 37              | 20.44      |
|                             | 7+                                                | 28              | 15.47      |
| Age of last child           | 0+                                                | 10              | 7.69       |
|                             | 1[1-3]                                            | 67              | 51.54      |
|                             | 2[4-6]                                            | 15              | 11.54      |
|                             | 7+                                                | 38              | 29.23      |
| Treatment with praziquantel | < 12 months                                       | 1               | 0.3        |
|                             | > 12 months                                       | 292             | 96.1       |
|                             | Never                                             | 11              | 3.6        |
| Economic Activity           | Fishing (with/without farming)                    | 211             | 87.5       |
|                             | Farming (without fishing)                         | 30              | 12.4       |
| Proximity to lake           | <200m                                             | 268             | 88.16      |
|                             | >400m                                             | 36              | 11.84      |
| <b>2. Syndromic</b>         |                                                   |                 |            |
| Lower Abdominal Pain        | Yes                                               | 127             | 56.95      |
| Coital Pain                 | Yes                                               | 80              | 45.98      |
| Coital bleeding             | Yes                                               | 66              | 37.93      |
| Vaginal Itches              | Yes                                               | 153             | 68         |
| Vaginal Discharge           | Yes                                               | 90              | 42.06      |
| External genital Itch       | Yes                                               | 86              | 41.75      |
| Lower back Pain             | Yes                                               | 99              | 44.59      |
| Stress Incontinence         | Yes                                               | 44              | 19.47      |
| Menstrual Irregularities    | Yes                                               | 95              | 47.74      |
| Fertility                   | Sub fertility (marriage age + youngest child= 4+) | 158             | 88.8%      |
|                             | Infertility (marriage age + no of children=o)     | 20              | 11.2%      |
| Miscarriages                | 0                                                 | 74              | 41.11      |
|                             | 1+                                                | 106             | 58.89      |
| <b>3. Clinical</b>          |                                                   |                 |            |
| Parasitemia                 | 0                                                 | 141             | 46.38      |
|                             | 1[1-50]                                           | 104             | 34.21      |
|                             | 50+                                               | 59              | 19.41      |
| Hematuria                   | +                                                 | 19              | 6.25       |
| Microhaematuria             | +                                                 | 152             | 50         |
| Proteinuria                 | +                                                 | 86              | 28.29      |

### 1. UGS Characteristics amongst sample population

Table 2 presents the relationship between UGS as a dependent factor and each of the sociodemographic and reported reproductive health characteristics based on chi-square tests of independence and univariate logistic regression. The results indicate that the chances of UGS infection amongst women who lived more than 400m from the lake was 0.36 (95% CI: 0.17-0.72) times that of women who lived less than

272 200m to the lake, implying that significant odds of being infected with UGS was seen with closer lake  
 273 proximity. A significant decrease in chances of infection with urogenital schistosomiasis was observed  
 274 with increasing age. Relative to girls <14 years, girls between 14-19 years had a 0.46 (95% CI: 0.22-  
 275 0.95) odds of having UGS, as opposed to 0.29 (95% CI: 0.15-0.54) odds for adults ranging from 20-35  
 276 years, and 0.09 (95% CI: 0.04-0.19) odds for women older than 35 years. All reported reproductive  
 277 health syndromes showed significant relationship with UGS infection, except for stress incontinence  
 278 (UOR 1.72 [95% CI: 0.87-3.54]  $p=0.1287$ ). In effect, women with lower abdominal pain, coital pain,  
 279 vaginal itch, menstrual irregularity, and coital bleeding showed significantly higher odds (Table 2) of  
 280 infection with UGS.

281 **Table 2:** Relations between UGS and each socio-demographic and syndromic variable in the study  
 282 sample

| Variables                  | Category | N   | Chi2 Test of Independence |                |         | Univariate logistic regression |         |
|----------------------------|----------|-----|---------------------------|----------------|---------|--------------------------------|---------|
|                            |          |     | UGS –<br>n (%)            | UGS +<br>n (%) | P-value | Unadjusted OR<br>(95% C.I.)    | P value |
| Age group                  | <14      | 111 | 20 (18.2)                 | 91 (46.9)      | 0       | 1                              | 0.0352  |
|                            | [14-19]  | 62  | 20 (18.2)                 | 42 (21.6)      |         | 0.46 (0.22, 0.95)              |         |
|                            | [20-35]  | 83  | 36 (32.7)                 | 47 (24.2)      |         | 0.29 (0.15, 0.54)              |         |
|                            | 36+      | 48  | 34 (30.9)                 | 14 (7.2)       |         | 0.09 (0.04, 0.19)              |         |
| No of Children             | 0        | 44  | 15 (18.1)                 | 29 (29.6)      | 0.0462  | 1                              | 0.2143  |
|                            | [1-3]    | 72  | 33 (39.8)                 | 39 (39.8)      |         | 0.61 (0.28, 1.32)              |         |
|                            | [4-6]    | 37  | 16 (19.3)                 | 21 (21.4)      |         | 0.68 (0.27, 1.67)              |         |
|                            | 7+       | 28  | 19 (22.9)                 | 9 (9.2)        |         | 0.25 (0.09, 0.66)              |         |
| Age of Last Child          | 0+       | 10  | 4 (6)                     | 6 (9.5)        | 0.0323  | 1                              | 0.5863  |
|                            | [1-3]    | 67  | 33 (49.3)                 | 34 (54)        |         | 0.69 (0.16, 2.62)              |         |
|                            | [4-6]    | 15  | 4 (6)                     | 11 (17.5)      |         | 1.83 (0.33, 10.6)              |         |
|                            | 7+       | 38  | 26 (38.8)                 | 12 (19)        |         | 0.31 (0.07, 1.27)              |         |
| Miscarriages               | 0        | 74  | 41 (48.8)                 | 33 (34.4)      | 0.1055  | 1                              | 0.0382  |
|                            | 1        | 52  | 19 (22.6)                 | 33 (34.4)      |         | 2.16 (1.05, 4.52)              |         |
|                            | 2+       | 54  | 24 (28.6)                 | 30 (31.2)      |         | 1.55 (0.77, 3.17)              |         |
| Lower Abdominal Pain       | Yes      | 127 | 42 (45.2)                 | 85 (65.4)      | 0.0039  | 2.29 (1.33, 3.98)              | 0.0028  |
| Coital Pain                | Yes      | 80  | 25 (30.5)                 | 55 (59.8)      | 0.0001  | 3.39 (1.82, 6.43)              | 0.0001  |
| Coital bleeding            | Yes      | 66  | 19 (23.2)                 | 47 (51.1)      | 0.0002  | 3.46 (1.82, 6.79)              | 0.0002  |
| Vaginal Itches             | Yes      | 153 | 51 (53.7)                 | 102 (78.5)     | 0.0001  | 3.14 (1.77, 5.67)              | 0.0001  |
| Abnormal Vaginal Discharge | Yes      | 90  | 27 (29)                   | 63 (52.1)      | 0.0008  | 2.66 (1.51, 4.76)              | 0.0008  |
| Lower Back Pain            | Yes      | 99  | 34 (36.6)                 | 65 (50.4)      | 0.0551  | 1.76 (1.03, 3.06)              | 0.0416  |
| Stress Incontinence        | Yes      | 44  | 14 (14.7)                 | 30 (22.9)      | 0.1729  | 1.72 (0.87, 3.54)              | 0.1287  |
| Genital Itches             | Yes      | 86  | 26 (28.6)                 | 60 (52.2)      | 0.0007  | 2.73 (1.53, 4.94)              | 0.0008  |
| Menstrual Irregularity     | Yes      | 95  | 29 (33)                   | 66 (59.5)      | 0.0002  | 2.98 (1.68, 5.4)               | 0.0002  |
| Proximity to lake          | <20m     | 268 | 89 (80.9)                 | 179 (92.3)     | 0.0051  | 1                              | 0.0042  |
|                            | >200m    | 36  | 21 (19.1)                 | 15 (7.7)       |         | 0.36 (0.17, 0.72)              |         |

283

## 284 **Multivariate Logistic Regression Model for Reporting Sexual and Reproductive Health (SRH)**

### 285 **Risk Factors related to UGS**

286 After including all variables significantly related to UGS at a 25% level in a multivariate model,  
 287 multicollinearity issues were suspected between lower abdominal pain and lower back pain; and external

288 genital itch and vaginal itches. However, considering genital itch responses were most often related to  
 289 vaginal itch or misreported by respondents due to their literal similarity in Pidgin English or Fulbe used  
 290 during questioning, we resorted to keeping only Vaginal Itches in the model. Similarly for lower back  
 291 pain and lower abdominal pain because of the similarity in responses, but with a more comprehensive  
 292 responding for lower abdominal pain, lower back pain was removed. The resulting “best” fitting model  
 293 included Age group, Lower abdominal pain and coital pain as the most significant sexual and  
 294 reproductive health risk factors for UGS (Table 3). In this result, we also observed a decreasing trend in  
 295 UGS infection with increasing age. Also, the odds of infection in women with lower abdominal pain  
 296 was 6.42 (95% CI: 2.85 - 15.68) times that for women without the pain. The odds of infection in women  
 297 with coital pain was 2.16 (95% CI: 1.05 – 4.46) times that for women without the pain.

298  
 299 **Table 3:** Possible risk factors for UGS amongst the socio-demographic and SRH included in the study.  
 300 A multivariate logistic regression model on the effects of sexual and reproductive health factors  
 301 significantly related to UGS infection.

| SRH Indicator        | Category | Adjusted OR<br>(95% C.I.) | P value |
|----------------------|----------|---------------------------|---------|
| Age group            | [14-19]  | 1.0                       |         |
|                      | 20-35]   | 0.28 (0.10, 0.70)         | 0.0087  |
|                      | 36+      | 0.11 (0.04, 0.31)         | 0.0001  |
| Lower Abdominal Pain | No       | 1.0                       |         |
|                      | Yes      | 6.42 (2.85, 15.68)        | 0.0000  |
| Coital Pain          | No       | 1.0                       |         |
|                      | Yes      | 2.16 (1.05, 4.46)         | 0.0362  |

302

## 303 2. FGS Characteristics amongst study participants (Sub group)

304 Of the total number of participants examined for FGS after UGS ( $n=67$ ), 40 were confirmed to have  
 305 ova-patent UGS, and 34, for FGS upon the presence of homogenous yellow sandy patches, grainy sandy  
 306 patches, and abnormal blood vessels (Figure 2). Related reproductive health syndromes (as reported in  
 307 UGS), similarly, were all found to have some association ( $P < 0.05$ ) with FGS manifestation amongst  
 308 females (Table 4), except for stress incontinence. Of import amongst these, menstrual irregularities or  
 309 abnormality (collected as irregular, painful or ceased menstruation), more so than found with UGS, was  
 310 seen to have 7.9 times higher odds of affecting women with FGS than women without FGS (Table 4).

311 Contrarily to UGS, back pain was seen to significantly affect women with FGS manifestations than was  
 312 the case with UGS. Similarly, odds of having FGS manifestations were seen to descend with age (Table  
 313 4), unlike UGS which was significant with ascending age. Lower abdominal pain, menstrual irregularity  
 314 and lower back pain showed the highest odds of manifesting amongst women positive for FGS.

315 **Figure 2: Imagery of FGS pathology of the cervix with reported lesions (magnification of x4)**

316 **A)** 1-rubbery papule, 2-abnormal blood vessel, 3- homogeneous sandy patch (30 year old woman,  
 317 +UGS, +lower abdominal pain, +Menstrual irregularity) ; **B)** 1,2- grainy sandy patches (45 year old  
 318 woman, -UGS, +lower abdominal pain ; +Menstrual irregularity)

320 **Table 4: Relations between FGS and socio-demographic and syndromic variables in the sub group of**  
 321 girls and women diagnosed for FGS

| Variable             | Category | N  | Chi2 Test of Independence |               |         | Univariate logistic regression |                |         |               |        |
|----------------------|----------|----|---------------------------|---------------|---------|--------------------------------|----------------|---------|---------------|--------|
|                      |          |    | FGS –<br>n(%)             | FGS +<br>n(%) | P-value | Unadjusted OR<br>(95% C.I.)    |                | P value |               |        |
| Age group            | [14-19]  | 19 | 15 (45.5)                 | 4 (11.8)      | 0.0091  | 1                              | (1.73, 26.1)   | 0.0077  |               |        |
|                      | [20-35]  | 29 | 11 (33.3)                 | 18 (52.9)     |         | 6.14                           |                |         |               |        |
|                      | 36+      | 19 | 7 (21.2)                  | 12 (35.3)     |         | 6.43                           |                |         | (1.62, 30.35) | 0.0116 |
| Age at Marriage      | 13-15    | 23 | 10 (30.3)                 | 13 (38.2)     | 0.1286  | 1                              | (0.19, 1.58)   | 0.2765  |               |        |
|                      | 15-17    | 38 | 22 (66.7)                 | 16 (47.1)     |         | 0.56                           |                |         |               |        |
|                      | 18+      | 6  | 1 (3)                     | 5 (14.7)      |         | 3.85                           |                |         | (0.51, 79.99) | 0.2510 |
| No of Children       | 0        | 16 | 12 (36.4)                 | 4 (11.8)      | 0.0363  | 1                              | (1.19, 28.98)  | 0.0357  |               |        |
|                      | [1-3]    | 22 | 12 (36.4)                 | 10 (29.4)     |         | 2.5                            |                |         | (0.64, 11.23) | 0.2024 |
|                      | [4-6]    | 15 | 4 (12.1)                  | 11 (32.4)     |         | 8.25                           |                |         | (1.79, 46.95) | 0.0102 |
|                      | 7+       | 14 | 5 (15.2)                  | 9 (26.5)      |         | 5.4                            |                |         |               |        |
| Age of Last Child    | 0+       | 1  | 1 (4.8)                   | 0 (0)         | 0.1199  | 1                              | (0, Inf)       | 0.9965  |               |        |
|                      | [1-3]    | 27 | 14 (66.7)                 | 13 (46.4)     |         | Inf                            |                |         |               |        |
|                      | [4-6]    | 4  | 0 (0)                     | 4 (14.3)      |         | Inf                            |                |         | (0, Inf)      | 0.9937 |
|                      | 7+       | 17 | 6 (28.6)                  | 11 (39.3)     |         | Inf                            |                |         | (0, Inf)      | 0.9963 |
| Miscarriages         | 0        | 26 | 18 (54.5)                 | 8 (23.5)      | 0.0362  | 1                              | (1.14, 14.19)  | 0.0343  |               |        |
|                      | 1        | 22 | 8 (24.2)                  | 14 (41.2)     |         | 3.94                           |                |         | (1.22, 13.78) | 0.0256 |
|                      | 2+       | 19 | 7 (21.2)                  | 12 (35.3)     |         | 3.86                           |                |         |               |        |
| Lower Abdominal Pain | Yes      | 47 | 15 (45.5)                 | 32 (94.1)     | 0       | 19.2                           | (4.74, 131.08) | 0.0003  |               |        |
| Coital Pain          | Yes      | 32 | 10 (30.3)                 | 22 (64.7)     | 0.0071  | 4.22                           | (1.55, 12.16)  | 0.0058  |               |        |
| Coital bleeding      | Yes      | 29 | 8 (24.2)                  | 21 (61.8)     | 0.0029  | 5.05                           | (1.82, 15.19)  | 0.0026  |               |        |
| Vaginal Itches       | Yes      | 49 | 18 (54.5)                 | 31 (91.2)     | 0.0009  | 8.61                           | (2.44, 40.95)  | 0.0021  |               |        |
| Vaginal Discharge    | Yes      | 32 | 9 (27.3)                  | 23 (67.6)     | 0.0014  | 5.58                           | (2.01, 16.67)  | 0.0013  |               |        |
| Back Pain            | Yes      | 41 | 12 (36.4)                 | 29 (85.3)     | 0       | 10.15                          | (3.31, 36.45)  | 0.0001  |               |        |
| Stress               | Yes      | 10 | 0 (0)                     | 10 (29.4)     | 0.0009  | Inf                            | (0, Inf)       | 0.9927  |               |        |
| Incontinence         |          |    |                           |               |         |                                |                |         |               |        |
| Genital Itch         | Yes      | 32 | 9 (27.3)                  | 23 (67.6)     | 0.0014  | 5.58                           | (2.01, 16.67)  | 0.0013  |               |        |

|                          |       |    |           |           |        |      |              |        |
|--------------------------|-------|----|-----------|-----------|--------|------|--------------|--------|
| Menstrual irregularities | Yes   | 34 | 9 (27.3)  | 25 (73.5) | 0.0002 | 7.41 | (2.61, 23)   | 0.0003 |
| Proximity                | <20m  | 60 | 30 (90.9) | 30 (88.2) | 1      | 1    |              |        |
|                          | >200m | 7  | 3 (9.1)   | 4 (11.8)  | 1      | 1.33 | (0.27, 7.25) | 0.7212 |

322

### 323 **Multivariate Logistic Regression Model for Reporting Sexual and Reproductive Health (SRH)** 324 **Risk Factors related to FGS**

325 Similar to UGS, a multivariate model was constructed with all variables significantly related to FGS at  
326 a 25% level. As well, multicollinearity checks revealed lower back pain and genital itch (for same  
327 reasons) with the variables age group, coital pain, vaginal itches and lower abdominal pain (Table 5)  
328 retained in the “best” fitting model.

329

330 **Table 5:** Possible risk factors amongst SRH for FGS. A multivariate logistic regression model on the  
331 effects of FGS infection on sexual and reproductive health factors.

| SRH Indicator        | Category | Adjusted OR<br>(95% C.I.) | P value |
|----------------------|----------|---------------------------|---------|
| Age group            | [14-19]  |                           |         |
|                      | [20-35]  | 20.15 (2.92, 240.94)      | 0.0061  |
|                      | 36+      | 41.29 (4.16, 946.69)      | 0.0054  |
| Coital Pain          | No       | 1.0                       |         |
|                      | Yes      | 10.44 (2.12, 90.91)       | 0.0105  |
| Vaginal Itches       | No       | 1.0                       |         |
|                      | Yes      | 12.50 (1.92, 128.77)      | 0.0151  |
| Lower Abdominal Pain | No       | 1.0                       |         |
|                      | Yes      | 28.80 (3.36, 578.24)      | 0.0081  |

332

### 333 **3. UGS, FGS and associations with reproductive health characteristics**

334 Age, number of children, age of last child, menstrual abnormality, miscarriages, and lower abdominal  
335 pain were identified as possible reproductive health factors associated with *S. haematobium* infection,  
336 and were used within this study. Generally, both FGS and UGS were not significantly ( $P$ -value  $>0.05$ )  
337 related to number of children, age of last child and miscarriages. In multivariate logistic regression  
338 models, after selection of the best fitting models, the results show that the most significant risk factors  
339 for UGS are age group, lower abdominal pain and coital pain (Table 4), whereas age-group and lower  
340 abdominal pain, coital pain and vaginal itches were identified as the most significant risk factors for  
341 FGS (Table 5). Chances of FGS manifestations amongst women with lower abdominal pain was AOR  
342 9.5(95% CI:1.7-81.8) times that of women without the pain (Table 5). Analysis of deviance tables for

343 both best fitting models (FGS and UGS), with *p*-values based on likelihood ratio tests are reported in  
344 Supplementary File 2.

345

## 346 **Discussion**

347 Our study, given our application of portable colposcopy, is the first formal attempt to document the  
348 pathology of FGS in a primary care setting in Cameroon. Elsewhere, the clinical pathology of FGS has  
349 been described resulting from the complex inflammatory responses to antigens released by adult worms  
350 and viable eggs[4, 11], which persists until sometime after adult worms are stopped egg-laying or are  
351 destroyed by praziquantel[21]. Thereafter, various signs and symptoms may present months or even  
352 years after treatment[20, 37]. Understanding the risks and associations of these UGS and FGS, especially  
353 within different contexts of women's health[36, 47], sheds greater light on the disease epidemiology,  
354 which could foster improved and coordinated control measures both locally and nationally[36].  
355 Furthermore, precisely documenting existing associations between both FGS and UGS could clarify  
356 further the need for precision mapping of schistosomiasis in endemic regions, for formulating a better  
357 targeted integrated response[43]. Though a non-significant association was observed between egg  
358 intensity in urine and FGS from the onset of this study (Table 2), parasitemia association has been  
359 shown to be misleading[5] from several other studies and reports on FGS, particularly when only a  
360 single urine sample is examined which is usually the case for population-based surveillance[4].  
361 Considering this, questionnaire (for symptoms)[9, 18], as well as visual examination of cervix and  
362 vaginal walls by colposcopy[15, 48], offers an added strength to single sample urinalysis for detection  
363 of FGS, as carried out in this study, and several others[9, 15]. The possibility of the presence of FGS in  
364 UGS populations has been often raised[6, 18], with projections of about 360 million girls and women  
365 possibly infected with UGS[12], but today it is thought that at least 56 million adolescent girls and  
366 women are suffering from FGS[12, 14]. Our results maybe show an even higher rate of FGS infection  
367 amongst the UGS infected population with an approximate FGS/UGS ratio of 34/40.

1  
2  
3 368 From present results, and within the general literature[12, 14], one of such effects noted is an effect on  
4  
5 369 menstrual health. More than half of women within the study who reported poor menstrual health (FGS  
6  
7 370 = 73.5% ; UGS = 54.6%), either as irregular, painful or seized menstruation, were found to either shed  
8  
9 371 eggs in urine (positive for UGS), or were positive for FGS, but without eggs in urine; showing more  
10  
11 372 women positive for FGS reporting abnormal menstruation, than for UGS. This confirms recent  
12  
13 373 analysis[14, 28] and suggests strong linkages between menstrual health management and FGS[12, 14],  
14  
15  
16 374 an under researched area. This can be credited to the fact that symptoms perhaps diminished after a  
17  
18 375 while with UGS (maybe as a result of treatment in mass drug administration campaigns), but later  
19  
20 376 resurface with more chronic sequelae of FGS[14], and with more dire symptoms and negative impact  
21  
22 377 on mental health[14, 28]. In our study context, post-menarche females already faced a substantial  
23  
24 378 challenge with limited access to hygienic material and information on menstrual health management,  
25  
26 379 typically relying on self-made clothes and absorbent plant leaves during menstruation, due to lack of  
27  
28 380 finances or general knowledge.

31  
32 381 Still related to FGS and menstrual health, narratives from a previous study[28] which used qualitative  
33  
34 382 probing showed women having manifestations of FGS and not shedding eggs in urine, gave a history of  
35  
36 383 having lived in their earlier years in heavily infested *S. haematobium* foci, which explained their later  
37  
38 384 manifestation of FGS symptoms, even after having moved away to a less infested area, with more than  
39  
40 385 90% limit in fresh water contact[28]. This as well relates to this study, where compared to UGS, lake  
41  
42 386 proximity was seen to be not very significant to disease manifestation (Table 5), same like egg shedding,  
43  
44 387 still pointing to early-in-life infection and later chronicity. Significant difference in menstrual  
45  
46 388 abnormalities amongst UGS positive women [n=22(56.4)] and UGS negative women [n=12 (44.4)],  
47  
48 389 alerts to future chronicity of FGS after infection with UGS, especially if not managed with more readily  
49  
50 390 available praziquantel treatment(s)[37, 49].

53  
54 391 On its own, lower abdominal pain observed significant association (in adjusted and unadjusted  
55  
56 392 regression models) in both UGS and FGS infections. The chances of having lower abdominal pain was  
57  
58 393 significantly higher in females with either FGS (94.1%) or UGS (84.2%). Similarly with coital pain and  
59  
60 394 vaginal itches, these reported as key indicators for UGS and FGS, directing early diagnosis of UGS and



395 future FGS in endemic communities, promoting the verticalization of control strategies for both  
396 diseases.

397 Another trend observed in this study is that intensity of infection or egg patent-prevalence (for UGS)  
398 reduces while chronic disease or morbidity for FGS increases as women age. Since women aged (36+),  
399 chances of FGS after infection with UGS increased significantly (AOR 6.43,95% C.I 1.62-30.35,  
400 P=0.0091), similarly reported in other studies in different geographical locations[4, 11, 50, 51] and  
401 recently in this area[28]; emphasizing on the level of present intensity of infection for UGS, and possible  
402 future occurrence of FGS[11, 51]. UGS at a younger age will in some cases manifest into FGS when the  
403 female is older[11], causing more intense gynecological symptoms and effects. This offers a possible  
404 guiding tool for better control policies, related to early diagnosis and treatment[36, 52]. This surpasses  
405 need alone for school-based MDAs[24], but considers and encourages individual therapy in different  
406 contexts for FGS (and MGS)[4].

407 Although only a few amongst the extensive list of reproductive health determinants [54] were identified  
408 in this study to be statistically significant, where mostly reported symptoms were collected, clinical and  
409 biological examinations carried out, enabled confirmation of how future self-reported symptoms with  
410 UGS and FGS might be best used[28]. These results support the advocated need for availability of  
411 praziquantel in lowest level (Health Areas and community) of health care for individual therapy[51], as  
412 well as treatment from a younger age[12, 24, 36, 49] buoyed with the recent development of pediatric  
413 praziquantel[53].

#### 414 **Study Limitations**

415 Though described as gold standard[45], active UGS was only detected through observation of eggs in  
416 urine sediments by microscopic-based poly-carbonate filter examination, as well as recommended  
417 dipstick assays for urinary haematuria detection. Alternative molecular assays molecular assays such  
418 as polymerase chain reaction (PCR) for schistosome detection in human serum and urine samples, were  
419 not considered for added sensitivity for UGS and FGS (in vaginal lavage analysis)[54]. Though  
420 recommended[18, 55], only visual examination through inspection for lesions on the cervix, the fornices,

1  
2  
3 421 and the vaginal walls with a colposcope[2, 48] and screening with questionnaires was considered in the  
4  
5 422 detection of FGS in this study. Lastly, the sample population for FGS detection (n=67) was limited to  
6  
7 423 girls older than age 13, though other reports have shown pre-puberty girls younger than 10 could  
8  
9 424 manifest gynecological damages as a result of infection with urogenital schistosomiasis[11]. In this  
10  
11 425 study, examination for this group of girls could be limited only to questionnaire, for ethical purposes.  
12  
13

## 14 426 **Conclusion**

15  
16  
17 427 Whilst millions of women in Cameroon have UGS, its epidemiological connection with FGS is not  
18  
19 428 fully appreciated, which creates an unfortunate knowledge holdup for effective control at the public  
20  
21 429 health level. In our chosen study location, which is broadly typical for endemic areas of UGS in  
22  
23 430 Cameroon[18, 29, 31, 35], strong epidemiological associations between UGS and FGS were found  
24  
25 431 against certain key sexual and reproductive determinants: age, lower abdominal pain and menstrual  
26  
27 432 health. This formative knowledge could be utilized to tackle and ultimately prevent FGS, with a more  
28  
29 433 targeted integrated control for UGS in Cameroon and elsewhere in endemic areas for UGS globally.  
30  
31 434 This study further adds detailed insight into the connection of FGS and UGS within primary care in  
32  
33 435 endemic communities, denoting those with cardinal symptomologies more explicitly for scalable  
34  
35 436 detection and targeted control of FGS within UGS endemic areas.  
36  
37

38 437

## 39 438 **Supporting Files**

40  
41  
42 439 Supplementary File 1.docx : Structured questionnaire

43  
44 440 Supplementary File 2.docx: Deviance Table  
45  
46

47 441

## 48 49 442 **Declarations**

### 50 443 • **Authors' contributions**

51  
52  
53 444 MCM and JRS conceptualized the study and planned the methodology; AEN, VG, MCM, carried out  
54  
55 445 field investigation; MCM, FNB, JRS, ASO, AEN, analyzed and interpreted the data for this manuscript;  
56  
57 446 MCM acquired funding for study and wrote the original draft of the manuscript; JRS supervised the  
58  
59 447 study and was a major contributor in the conceptualization and writing of the manuscript; AEN,  
60

1  
2  
3 448 coordinated field activities within the Malanteoun Health District; AEN, FNB, VG, ASO, reviewed and  
4  
5 449 edited the manuscript. All authors approved the final version of the paper before submission.  
6  
7

8 450

9  
10  
11  
12 451 • **Competing interests**

13  
14  
15 452 The authors declare that they have no competing interests.  
16

17  
18 453 • **Funding**

19  
20  
21 454 This study is funded through a fellowship offered by “l'Organisation de Coordination pour la lutte contre  
22  
23 455 les Endémies en Afrique Centrale (OCEAC)”, financed by the Ministry for Economic Cooperation and  
24  
25 456 Development (BMZ) of the Federal Republic of Germany, through the KfW (German Development  
26  
27 457 Bank). "Projet Lutte Contre Les Maladies Tropicales Négligées en Afrique Centrale" (MTN) BMZ-Nr  
28  
29 458 2015.69.227 BMZ 2016.68.797. The funders had no role in study design, data collection and analysis,  
30  
31 459 decision to publish, or preparation of the manuscript.  
32

33  
34  
35 460 • **Data Sharing Statement**

36  
37  
38 461 All data generated or analysed during this study are included in this published article [and its  
39  
40 462 supplementary files].  
41

42  
43 463 • **Acknowledgements**

44  
45  
46 464 We acknowledge the National Program for the fight against Schistosomiasis and Soil-Transmitted  
47  
48 465 Helminths in Cameroon (PNLSHi). Thanks to the contribution of Dr Wepnje Godlove and Marlene  
49  
50 466 Nstinda Tchoffo in this research, and to all health workers and study participants at the Matta Health  
51  
52 467 Area for their support and sacrifice. We express appreciation to Dr. Savadogo Bonaventure and Dr Patty  
53  
54 468 Ngassa of the MTN-OCEAC Project for their technical advice and Coordination.  
55

56  
57 469 • **License Statement**  
58  
59  
60

1  
2  
3 470 I, the Submitting Author has the right to grant and does grant on behalf of all authors of the Work (as  
4  
5 471 defined in the below author licence), an exclusive licence and/or a non-exclusive licence for  
6  
7 472 contributions from authors who are: i) UK Crown employees; ii) where BMJ has agreed a CC-BY  
8  
9 473 licence shall apply, and/or iii) in accordance with the terms applicable for US Federal Government  
10  
11 474 officers or employees acting as part of their official duties; on a worldwide, perpetual, irrevocable,  
12  
13 475 royalty-free basis to BMJ Publishing Group Ltd (“BMJ”) its licensees and where the relevant Journal is  
14  
15 476 co-owned by BMJ to the co-owners of the Journal, to publish the Work in BMJ Global Health and any  
16  
17 477 other BMJ products and to exploit all rights, as set out in our licence.  
18  
19  
20 478

21  
22 479 The Submitting Author accepts and understands that any supply made under these terms is made by  
23  
24 480 BMJ to the Submitting Author unless you are acting as an employee on behalf of your employer or a  
25  
26 481 postgraduate student of an affiliated institution which is paying any applicable article publishing charge  
27  
28 482 (“APC”) for Open Access articles. Where the Submitting Author wishes to make the Work available on  
29  
30 483 an Open Access basis (and intends to pay the relevant APC), the terms of reuse of such Open Access  
31  
32 484 shall be governed by a Creative Commons licence – details of these licences and which Creative  
33  
34 485 Commons licence will apply to this Work are set out in our licence referred to above.  
35  
36  
37

38 486 • **Consent for publication**

39  
40  
41 487 Written informed consent for publication of clinical details and/or clinical images was obtained from  
42  
43 488 the patients and parents/guardians where needed.  
44  
45  
46 489

47  
48  
49 490 **References**

- 50  
51 491 1. Sjøfteland S, Sebitloane MH, Taylor M, Roald BB, Holmen S, Galappaththi-Arachchige HN, et  
52 492 al. A systematic review of handheld tools in lieu of colposcopy for cervical neoplasia and female  
53 493 genital schistosomiasis. *International Journal of Gynecology & Obstetrics*. 2021;153(2):190-9.  
54 494 2. WHO. *Female Genital Schistosomiasis: A Pocket Atlas for Clinical Health-Care Professionals*  
55 495 Geneva: WHO Press; 2015 [Available from:  
56 496 <https://www.who.int/publications/i/item/9789241509299>.  
57 497 3. Botelho MC, Machado JC, Brindley PJ, Correia da Costa JM. Targeting molecular signaling  
58 498 pathways of *Schistosoma haematobium* infection in bladder cancer. *Virulence*. 2011;2(4):267-79.  
59  
60

- 1
- 2
- 3 499 4. Kjetland E, Leutscher P, Ndhlovu P. A review of female genital schistosomiasis. *Trends in*
- 4 500 *Parasitology*. 2012;28(2):58-65.
- 5 501 5. Poggensee G, Kiwelu I, Saria M, Richter J, Krantz I, Feldmeier H. Schistosomiasis of the lower
- 6 502 reproductive tract without egg excretion in urine. *Am J Trop Med Hyg*. 1998;59(5):782-3.
- 7 503 6. Christinet V, Lazdins-Helds J, Stothard J, Reinhard-Rupp J. Female genital schistosomiasis
- 8 504 (FGS): from case reports to a call for concerted action against this neglected gynaecological disease.
- 9 505 *International Journal for Parasitology*. 2016;46(7):395-404.
- 10 506 7. Freer JB, Bourke CD, Durhuus GH, Kjetland EF, Prendergast AJ. Schistosomiasis in the first
- 11 507 1000 days. *The Lancet Infectious Diseases*. 2018;18(6):e193-e203.
- 12 508 8. Shams M, Khazaei S, Ghasemi E, Nazari N, Javanmardi E, Majidiani H, et al. Prevalence of
- 13 509 urinary schistosomiasis in women: a systematic review and meta-analysis of recently published
- 14 510 literature (2016–2020). *Tropical Medicine and Health*. 2022;50(1):12.
- 15 511 9. Ekpo U, Odeyemi O, Sam-Wobo S, Onunkwor O, Mogaji H, Oluwole A, et al. Female genital
- 16 512 schistosomiasis (FGS) in Ogun State, Nigeria: a pilot survey on genital symptoms and clinical findings.
- 17 513 *Parasitology Open*. 2017;3:e10.
- 18 514 10. Hotez PJ, Engels D, Gyapong M, Ducker C, Malecela MN. Female Genital Schistosomiasis. *New*
- 19 515 *England Journal of Medicine*. 2019;381(26):2493-5.
- 20 516 11. Hegertun I, Gundersen S, Kleppa E, Zulu S, Gundersen S, Taylor M, et al. *S. haematobium* as a
- 21 517 common cause of genital morbidity in girls: a cross-sectional study of children in South Africa. *PLoS*
- 22 518 *neglected tropical diseases*. 2013;7(3):e2104.
- 23 519 12. UNAIDS. 'No more neglect:Female genital schistosomiasis and HIV.
- 24 520 [www.unaids.org/en/resources/documents/2019/](http://www.unaids.org/en/resources/documents/2019/): UNAIDS; 2019.
- 25 521 13. Hotez P. Speaking of Medicine and Health [Internet]. *BLOGS P*, editor: PLOS BLOGS. 2013.
- 26 522 Available from: [https://speakingofmedicine.plos.org/2013/05/06/female-genital-schistosomiasis-fgs-](https://speakingofmedicine.plos.org/2013/05/06/female-genital-schistosomiasis-fgs-sub-saharan-africas-secret-scourge-of-girls-and-women/)
- 27 523 [sub-saharan-africas-secret-scourge-of-girls-and-women/](https://speakingofmedicine.plos.org/2013/05/06/female-genital-schistosomiasis-fgs-sub-saharan-africas-secret-scourge-of-girls-and-women/).
- 28 524 14. Stothard JR, Odiere MR, Phillips-Howard PA. Connecting Female Genital Schistosomiasis and
- 29 525 Menstrual Hygiene Initiatives. *Trends in Parasitology*. 2020;38(5).
- 30 526 15. Bustinduy AL, Randriansolo B, Sturt AS, Kayuni SA, Leustcher PDC, Webster BL, et al. An
- 31 527 update on female and male genital schistosomiasis and a call to integrate efforts to escalate
- 32 528 diagnosis, treatment and awareness in endemic and non-endemic settings: The time is now. In:
- 33 529 Rollinson D, Stothard R, editors. *Advances in Parasitology*. 115: Academic Press; 2022. p. 1-44.
- 34 530 16. Majangara Karaga R. Concealed urogenital schistosomiasis causing chronic pelvic pain: A case
- 35 531 report. *Clinical Case Reports*. 2021;9(4):1860-4.
- 36 532 17. Stothard J. Female genital schistosomiasis - icebergs of morbidity ahead? *Trends in*
- 37 533 *parasitology*. 2012;28(5):174-5.
- 38 534 18. Campbell S, Stothard J, O'Halloran F, Sankey D, Durant T, Ombede D, et al. Urogenital
- 39 535 schistosomiasis and soil-transmitted helminthiasis (STH) in Cameroon: An epidemiological update at
- 40 536 Barombi Mbo and Barombi Kotto crater lakes assessing prospects for intensified control
- 41 537 interventions. *Infect Dis Poverty*. 2017;6(1):49-.
- 42 538 19. King C. Parasites and poverty: the case of schistosomiasis. *Acta Trop*. 2010;113(2):95-104.
- 43 539 20. Kjetland EF, Mduluzi T, Ndhlovu PD, Gomo E, Gwanzura L, Midzi N, et al. Genital
- 44 540 schistosomiasis in women: a clinical 12-month in vivo study following treatment with praziquantel.
- 45 541 *Trans R Soc Trop Med Hyg*. 2006;100(8):740-52.
- 46 542 21. Treatment of Female Genital Schistosomiasis (FGS) With Praziquantel: A Proof-of-Concept
- 47 543 Study (NCT04115072) [Internet]. NIH: ClinicalTrials.gov archive. 2020 [cited 31/01/2022].
- 48 544 22. Brindley PJ, Hotez PJ. Break Out: urogenital schistosomiasis and *Schistosoma haematobium*
- 49 545 infection in the post-genomic era. *PLoS neglected tropical diseases*. 2013;7(3):e1961.
- 50 546 23. Kukula VA, MacPherson EE, Tsey IH, Stothard JR, Theobald S, Gyapong M. A major hurdle in
- 51 547 the elimination of urogenital schistosomiasis revealed: Identifying key gaps in knowledge and
- 52 548 understanding of female genital schistosomiasis within communities and local health workers. *PLoS*
- 53 549 *neglected tropical diseases*. 2019;13(3):e0007207.
- 54
- 55
- 56
- 57
- 58
- 59
- 60

- 1  
2  
3 550 24. Faust CL, Osakunor DNM, Downs JA, Kayuni S, Stothard JR, Lamberton PHL, et al.  
4 551 Schistosomiasis Control: Leave No Age Group Behind. *Trends Parasitol.* 2020;36(7):582-91.  
5 552 25. World Health Organisation. WHO guideline on control and elimination of human  
6 553 schistosomiasis. <https://www.who.int/publications/i/item/9789240041608>: WHO; 2022. p. 142.  
7 554 26. SCI Foundation. FAST PACKAGE PROJECT 2021 [Available from:  
8 555 <https://schistosomiasiscontrolinitiative.org/projects/fast-research-project>  
9 556 27. Ndassi VD, Anchang-Kimbi JK, Sumbele IUN, Ngufor LA, Nadege K, Kimbi HK. The  
10 557 epidemiological status of urogenital schistosomiasis among reproductive aged individuals in the Tiko  
11 558 Health Area- a semi-urban setting in the Mount Cameroon area. *PLOS Neglected Tropical Diseases.*  
12 559 2021;15(1):e0008978.  
13 560 28. Masong MC, Wepnje GB, Marlene NT, Gamba V, Mengue M-T, Kouokam E, et al. Female  
14 561 Genital Schistosomiasis (FGS) in Cameroon: A formative epidemiological and socioeconomic  
15 562 investigation in eleven rural fishing communities. *PLOS Global Public Health.* 2021;1(10):e0000007.  
16 563 29. TchuentÉ LAT, N'Goran EK. Schistosomiasis and soil-transmitted helminthiasis control in  
17 564 Cameroon and Côte d'Ivoire: implementing control on a limited budget. *Cambridge core.*  
18 565 2009;136(13):1739-45.  
19 566 30. National Program for the control of Schistosomiasis and intestinal helminthiasis MoPHC.  
20 567 Towards elimination of Schistosomiasis and Soil-transmitted Helminthiasis and in Cameroon: A road  
21 568 map for paradigm shift 2021-2030. MINSANTE, Yaoundé: MINSANTE; 2022.  
22 569 31. National Program for the control of Schistosomiasis and intestinal helminthiasis. Progress  
23 570 Report Cameroon 2013-2019. Yaoundé: MINSANTE; 2019.  
24 571 32. World Health Organization. Global update on implementation of preventive chemotherapy  
25 572 against neglected tropical diseases in 2018. *Weekly Epidemiological Record* 2019;94(38):425-38.  
26 573 33. Crompton DWT, World Health Organization. Preventive chemotherapy in human  
27 574 helminthiasis : coordinated use of anthelmintic drugs in control interventions : a manual for health  
28 575 professionals and programme managers. Geneva: World Health Organization; 2006.  
29 576 34. Makia C, Ozano K, Tagne M, Tchoffo M, Ngang S, Thomson R, et al. Achieving equity in UHC  
30 577 interventions: who is left behind by neglected tropical disease programmes in Cameroon? *Glob*  
31 578 *Health Action.* 2021;14(1):1886457-.  
32 579 35. Njunda A, Ndzi E, Assob J, Kamga H, Kwenti E. Prevalence and factors associated with  
33 580 urogenital schistosomiasis among primary school children in barrage, Magba sub-division of  
34 581 Cameroon. *BMC Public Health.* 2017;17(1):618.  
35 582 36. WHO. Deworming adolescent girls and women of reproductive age. Policy Brief [press  
36 583 release]. Geneva: WHO2022.  
37 584 37. Nour NM. Schistosomiasis: health effects on women. *Rev Obstet Gynecol.* 2010;3(1):28-32.  
38 585 38. MINSANTE. Schistosomiasis distribution in Malanteoun Health District NTDmaps.org:  
39 586 MINSANTE; 2018 [Available from: <https://ntdmaps.org/>.  
40 587 39. National Institute of Statistics Cameroon. Socio-economic statistics of Cameroon, 2015  
41 588 Cameroon2004-2014 [Available from: [https://cameroon.opendataforafrica.org/SESC2015/socio-](https://cameroon.opendataforafrica.org/SESC2015/socio-economic-statistics-of-cameroon-2015)  
42 589 [economic-statistics-of-cameroon-2015](https://cameroon.opendataforafrica.org/SESC2015/socio-economic-statistics-of-cameroon-2015).  
43 590 40. Keptcheu T, Khan P, Gustave L, Gangue T. Some Haematological Parameters among Urinary  
44 591 Schistosomiasis-Malaria Coinfected Children in Suburb of Malentouen Health District, West Region  
45 592 Cameroon. *International Journal of TROPICAL DISEASE & Health,*. 2020;41(7):34-44.  
46 593 41. Daniels W. Biostatistics: A foundation for analysis in the health sciences. New York: Wiley &  
47 594 sons; 1999.  
48 595 42. Beekhuizen Hv, Sharma S. Subfertility. In: Unkels HvBaR, editor. *A Textbook of Gynecology for*  
49 596 *Less-Resourced Locations.* London NW3 3AY, UK: Global Library of Women's Medicine , Sapiens  
50 597 Publishing; 2012. p. 170.  
51 598 43. Colley DG, Bustinduy AL, Secor WE, King CH. Human schistosomiasis. *Lancet.*  
52 599 2014;383(9936):2253-64.  
53  
54  
55  
56  
57  
58  
59  
60

- 1  
2  
3 600 44. King CH, Bertsch D. Meta-analysis of urine heme dipstick diagnosis of *Schistosoma*  
4 601 *haematobium* infection, including low-prevalence and previously-treated populations. *PLoS*  
5 602 *neglected tropical diseases*. 2013;7(9):e2431.
- 6 603 45. World Health Organisation. Schistosomiasis WHO: WHO; 2022 [cited 2022. Available from:  
7 604 <https://www.who.int/news-room/fact-sheets/detail/schistosomiasis>.
- 8 605 46. WHO. Prevention and Control of Schistosomiasis and Soil Transmitted Helminths Geneva:  
9 606 WHO; 2002 [33/63]. Available from:  
10 607 [http://apps.who.int/iris/bitstream/handle/10665/42588/WHO\\_TRS\\_912.pdf;jsessionid=297C20DDFC](http://apps.who.int/iris/bitstream/handle/10665/42588/WHO_TRS_912.pdf;jsessionid=297C20DDFCBFFF9F9AAE9DF120C0F834?sequence=1)  
11 608 [BFFF9F9AAE9DF120C0F834?sequence=1](http://apps.who.int/iris/bitstream/handle/10665/42588/WHO_TRS_912.pdf;jsessionid=297C20DDFCBFFF9F9AAE9DF120C0F834?sequence=1).
- 12 609 47. World Health Organization. Regional Office for the Western Pacific. People Centered Health  
13 610 care: A policy framework. 2007.
- 14 611 48. Kjetland EF, Norseth HM, Taylor M, Lillebø K, Kleppa E, Holmen SD, et al. Classification of the  
15 612 lesions observed in female genital schistosomiasis. *Int J Gynaecol Obstet*. 2014;127(3):227-8.
- 16 613 49. Bustinduy AL, Friedman JF, Kjetland EF, Ezeamama AE, Kabatereine NB, Stothard JR, et al.  
17 614 Expanding Praziquantel (PZQ) Access beyond Mass Drug Administration Programs: Paving a Way  
18 615 Forward for a Pediatric PZQ Formulation for Schistosomiasis. *PLOS Neglected Tropical Diseases*.  
19 616 2016;10(9):e0004946.
- 20 617 50. Chetty A, Omondi MA, Butters C, Smith KA, Katawa G, Ritter M, et al. Impact of Helminth  
21 618 Infections on Female Reproductive Health and Associated Diseases. *Front Immunol*. 2020;11:577516.
- 22 619 51. Stothard JR, Stanton, M, Bustinduy, A, Sousa-Figueiredo, J C, Van Dam, GT, Betson, M, et al.,.  
23 620 Diagnostics for schistosomiasis in Africa and Arabia: A review of present options in control and future  
24 621 needs for elimination. *Cambridge core*. 2014(141):1947-61.
- 25 622 52. Richardson ST, Franklin AL, Rome ES, Simms-Cendan JS. Global Health: Urogenital  
26 623 Schistosomiasis in the Adolescent Girl. *Journal of Pediatric and Adolescent Gynecology*.  
27 624 2016;29(4):326-32.
- 28 625 53. Pediatric Praziquantel Consortium. Contract manufacturing agreement signed for production  
29 626 of new pediatric treatment for schistosomiasis 2021 [Available from:  
30 627 <http://https://www.pediatricpraziquantelconsortium.org/>.
- 31 628 54. Sturt A, Webb E, Phiri C, Mweene T, Chola N, van Dam G, et al. Genital self-sampling  
32 629 compared with cervicovaginal lavage for the diagnosis of female genital schistosomiasis in Zambian  
33 630 women: The BILHIV study. *PLOS Neglected Tropical Diseases*. 2020;14(7):e0008337.
- 34 631 55. Utzinger J, Becker SL, van Lieshout L, van Dam GJ, Knopp S. New diagnostic tools in  
35 632 schistosomiasis. *Clinical Microbiology and Infection*. 2015;21(6):529-42.

633

### 634 • Figure Legends

635 **Figure 1:** Study participant selection criteria and numbers with diagnostic methods flow

636 **Figure 2:** Imagery of FGS pathology of the cervix with reported lesions (magnification of x4)

637 **A)** 1-rubbery papule, 2-abnormal blood vessel, 3- homogeneous sandy patch (30-year-old woman, +UGS, +lower  
638 abdominal pain, +Menstrual irregularity); **B)** 1,2- grainy sandy patches (45-year-old woman, -UGS, +lower  
639 abdominal pain; +Menstrual irregularity)

640

641

642

643

1  
2  
3  
4  
5  
6  
7  
8  
9  
10  
11  
12  
13  
14  
15  
16  
17  
18  
19  
20  
21  
22  
23  
24  
25  
26  
27  
28  
29  
30  
31  
32  
33  
34  
35  
36  
37  
38  
39  
40  
41  
42  
43  
44  
45  
46  
47  
48  
49  
50  
51  
52  
53  
54  
55  
56  
57  
58  
59  
60

644  
645

For peer review only



## Sampling Flow Diagram

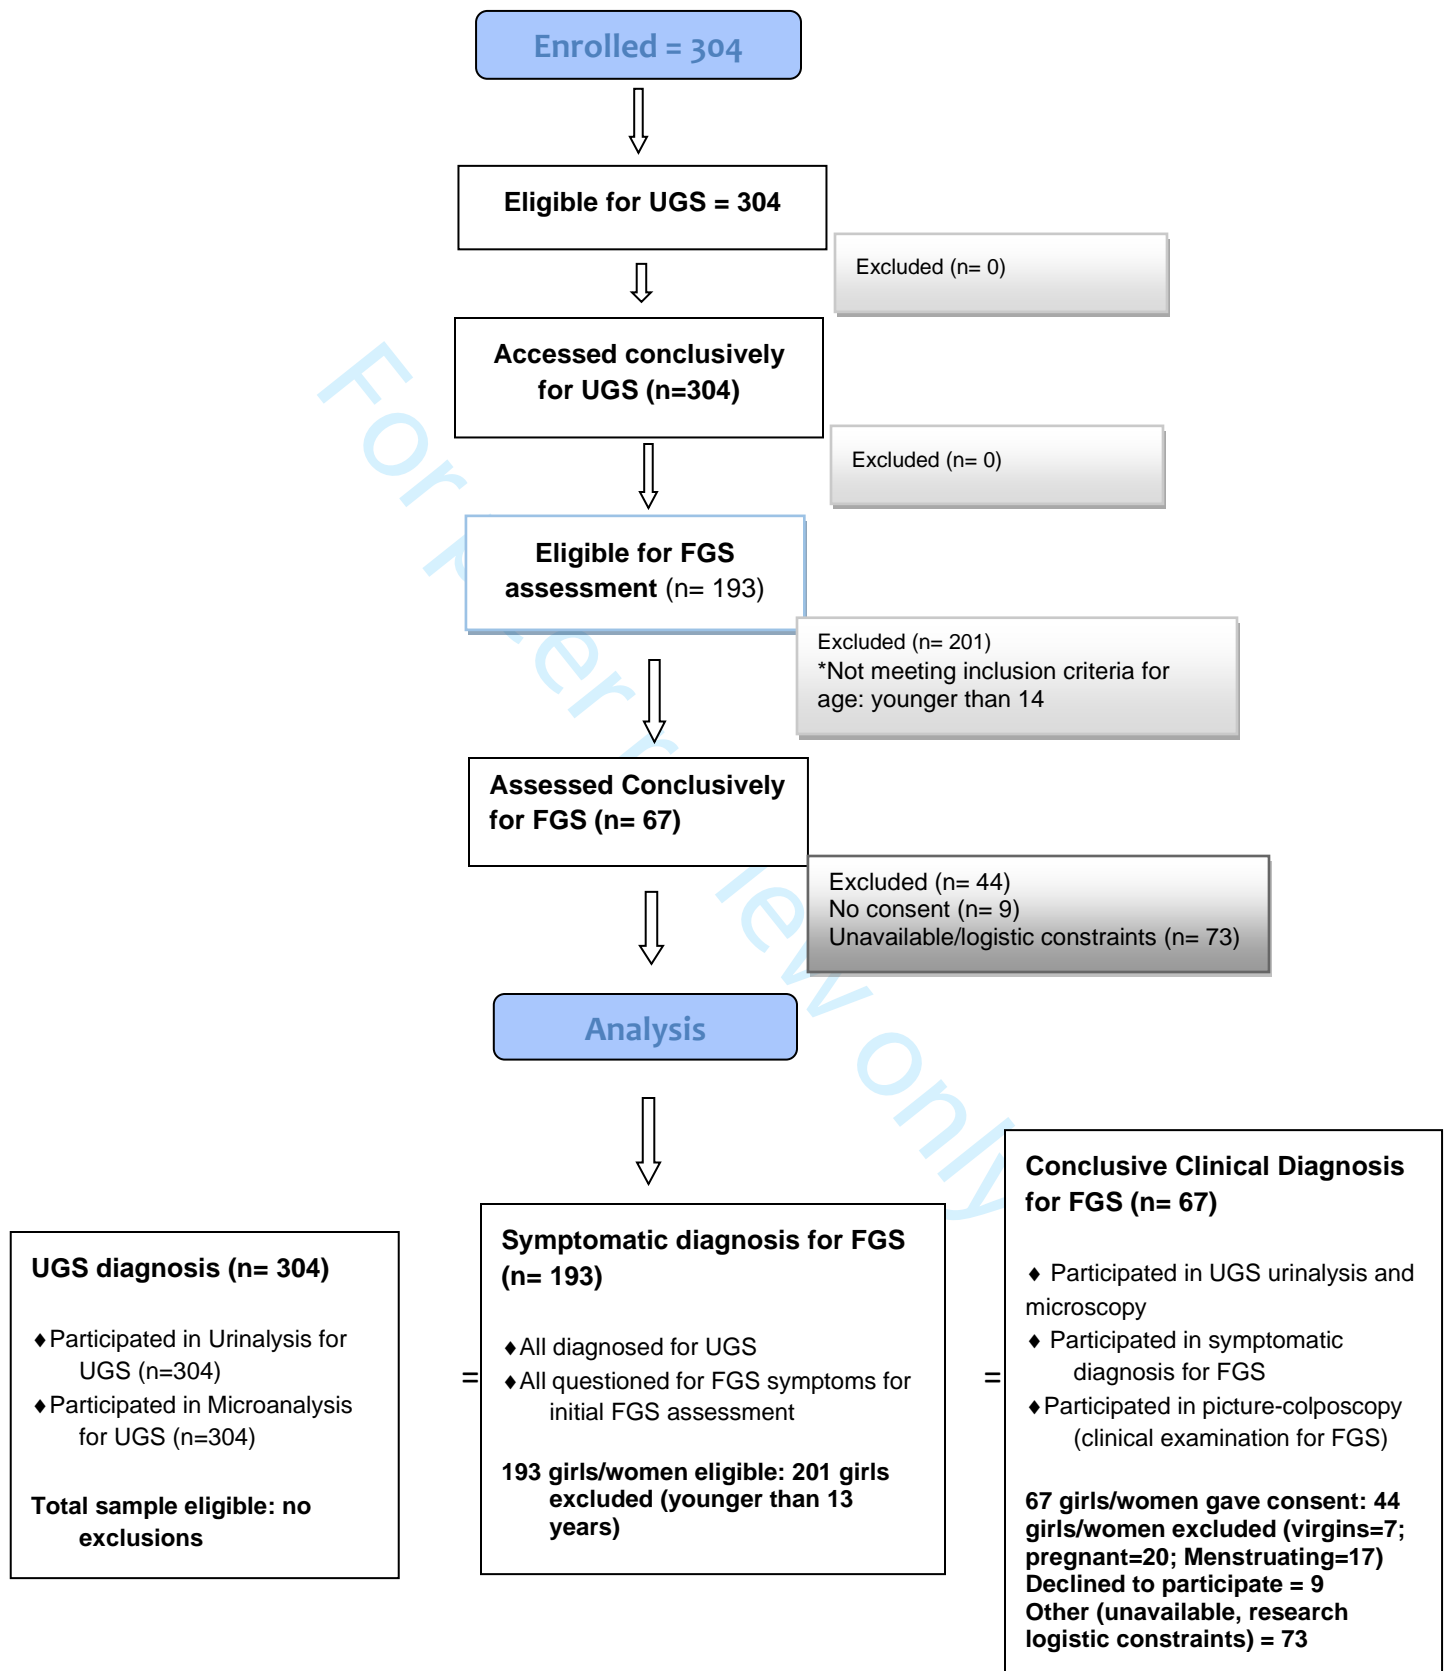

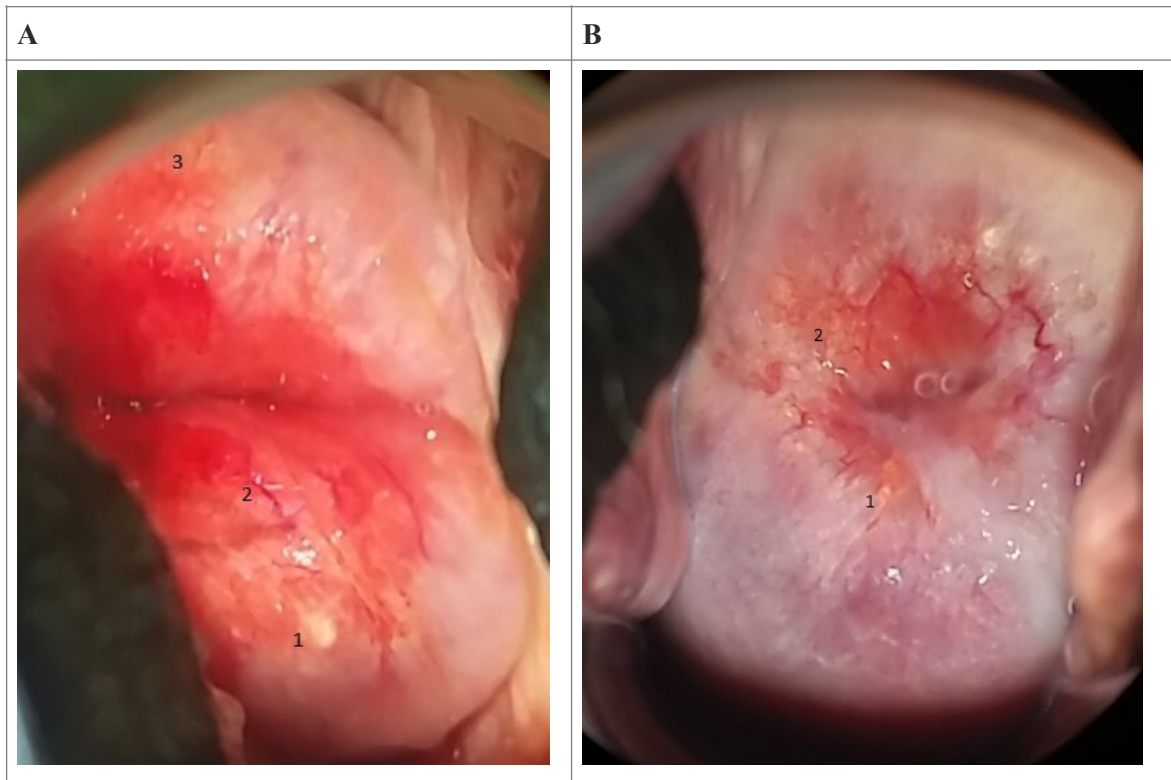

## Supplementary File 1

Close-ended structured questionnaire**A. Close ended structured questionnaire– Administered directly in English with oral translations into Fulbe, Kotoko, Mosgum, and Arab**

Name of Community: \_\_\_\_\_

Age (years): \_\_\_\_\_

Education: Informal education ( ) Formal education ( ) (specify) \_\_\_\_\_

Marital Status: Single ( ) Married ( ) Separated ( ) Widowed ( )

No of years having lived in community \_\_\_\_\_

Previous community \_\_\_\_\_

Economic activity-----

Residence ----- (collect coordinates)

**Questions on symptoms of urinary tract schistosomiasis; FGS; OR STI**

1. Do you see your menses? Yes ( ) No ( )
2. Did you observe/experience your menses within the last two weeks? Yes ( ) No ( ) Does your menses come every month? Regular?
3. Is your menses painful? \_\_\_\_\_(pain during menstruation – always very painful, sometimes painful, normal) Irregular? \_\_\_\_\_(every month?, not every month, stopped)
4. Do you have pain in your lower abdomen? When? For how long?
5. Do you have pain when urinating? Yes ( ) No ( )
6. Do you have difficulty in urinating (urine not coming out fluently)? Yes ( ) No ( )
7. Do you have sudden uncontrollable and unexpected urge to urinate and mostly cannot hold it? Even when you cough it comes out? Yes ( ) No ( )
8. Do you see blood in your urine? Yes ( ) No ( )
9. (If yes) When did you lastly see blood in your urine? \_\_\_\_\_Always, sometimes, Once in a while
10. Do you sometimes haveitching in your private part?Yes ( ) No ( )
11. How often do you experience this? Once a while ( ) frequently ( ) / When was the last time?
12. Do you have a feeling of burning within your private part? Yes ( ) No ( )

- 1  
2  
3 13. How often do you experience this? Once a while ( ) Frequently ( )  
4  
5 14. Do you sense a swelling/lumps within your private part? Yes ( ) No ( ) No response ( )  
6  
7 15. Do you have any discharge that comes from your vagina? Yes ( ) No ( ) Does it have an odour?  
8 \_\_\_\_\_ Do you see the colour? Yes ( ) No ( ) What Color is it? White; grey; green/yellow;  
9 brown  
10  
11  
12 16. Do you think this is normal? Yes ( ) No ( ) Do not know ( ). When did you start observing the  
13 discharge? Date \_\_\_\_\_  
14  
15 17. After sexual intercourse do you have a discharge? Yes ( ) No ( ) Is it smelly? Yes ( ) No ( ) Do not  
16 know ( )  
17 18. After or during sexual intercourse do you have pain? Yes ( ) No ( ) I do not know ( ) ; Do  
18 you have a bloody discharge? Yes ( ) No ( ) I do not know ( )  
19  
20 19. Have you had any miscarriages /pregnancies that passed? Yes ( ) No ( )  
21  
22 20. How many? ( )  
23  
24 21. Do you have children? Yes ( ) No ( )  
25  
26 22. What age is your last child? ( )  
27  
28 23. Have you visited the clinic to complain about these issues? Yes ( ) No ( )  
29  
30 24. What you used/taken/done to treat any of these problems? \_\_\_\_\_ (Underline) Hospital  
31 or drug store/ local midwife/ traditional medicine/ prayers/ none of the above (what other?  
32 Specify)/nothing  
33  
34  
35  
36

### Water contact History

- 37  
38  
39 1. Where do you fetch your household water? Lake; other source (name) \_\_\_\_\_  
40  
41 2. Do you fish in the lake? Yes ( ), No ( )  
42  
43 3. Do you bathe in the lake? Yes ( ), No ( )  
44  
45 4. What do you use the lake for? ( ) \_\_\_\_\_  
46  
47  
48  
49  
50  
51  
52  
53  
54  
55  
56  
57  
58  
59  
60

## Supplementary file 2

**Analysis of deviance tables for both best fitting models (FGS and UGS), with *p*-values based on likelihood ratio tests**

| Variable             | Df | Deviance | Resid. Df | Resid. Dev | Pr(>Chi)      |
|----------------------|----|----------|-----------|------------|---------------|
| <b>UGS</b>           |    |          |           |            |               |
| Age2                 | 2  | 19.0094  | 162       | 208.70     | 7.450e-05 *** |
| Lower Abdominal Pain | 1  | 25.6949  | 161       | 183.01     | 3.999e-07 *** |
| Coital Pain          | 1  | 4.4254   | 160       | 178.58     | 0.03541 *     |
| <b>FGS</b>           |    |          |           |            |               |
| Age2                 | 2  | 9.8057   | 64        | 83.061     | 0.0074253 **  |
| Coital Pain          | 1  | 11.3146  | 63        | 71.747     | 0.0007690 *** |
| Vaginal Itches       | 1  | 13.1740  | 62        | 58.573     | 0.0002839 *** |
| Lower Abdominal Pain | 1  | 10.5961  | 61        | 47.976     | 0.0011333 **  |

**STROBE 2007 (v4) checklist of items to be included in reports of observational studies in epidemiology\***  
**Checklist for cohort, case-control, and cross-sectional studies (combined)**

| Section/Topic             | Item # | Recommendation                                                                                                                                                                                                                                                                                                                                                                                                                                                         | Reported on page # |
|---------------------------|--------|------------------------------------------------------------------------------------------------------------------------------------------------------------------------------------------------------------------------------------------------------------------------------------------------------------------------------------------------------------------------------------------------------------------------------------------------------------------------|--------------------|
| Title and abstract        | 1      | (a) Indicate the study's design with a commonly used term in the title or the abstract                                                                                                                                                                                                                                                                                                                                                                                 | 1                  |
|                           |        | (b) Provide in the abstract an informative and balanced summary of what was done and what was found                                                                                                                                                                                                                                                                                                                                                                    | 2                  |
| <b>Introduction</b>       |        |                                                                                                                                                                                                                                                                                                                                                                                                                                                                        |                    |
| Background/rationale      | 2      | Explain the scientific background and rationale for the investigation being reported                                                                                                                                                                                                                                                                                                                                                                                   | 4-6                |
| Objectives                | 3      | State specific objectives, including any pre-specified hypotheses                                                                                                                                                                                                                                                                                                                                                                                                      | 6                  |
| <b>Methods</b>            |        |                                                                                                                                                                                                                                                                                                                                                                                                                                                                        |                    |
| Study design              | 4      | Present key elements of study design early in the paper                                                                                                                                                                                                                                                                                                                                                                                                                | 7-10               |
| Setting                   | 5      | Describe the setting, locations, and relevant dates, including periods of recruitment, exposure, follow-up, and data collection                                                                                                                                                                                                                                                                                                                                        | 7                  |
| Participants              | 6      | (a) <i>Cohort study</i> —Give the eligibility criteria, and the sources and methods of selection of participants. Describe methods of follow-up<br><i>Case-control study</i> —Give the eligibility criteria, and the sources and methods of case ascertainment and control selection. Give the rationale for the choice of cases and controls<br><i>Cross-sectional study</i> —Give the eligibility criteria, and the sources and methods of selection of participants | 8-9                |
|                           |        | (b) <i>Cohort study</i> —For matched studies, give matching criteria and number of exposed and unexposed<br><i>Case-control study</i> —For matched studies, give matching criteria and the number of controls per case                                                                                                                                                                                                                                                 | /                  |
| Variables                 | 7      | Clearly define all outcomes, exposures, predictors, potential confounders, and effect modifiers. Give diagnostic criteria, if applicable                                                                                                                                                                                                                                                                                                                               | 8-10               |
| Data sources/ measurement | 8*     | For each variable of interest, give sources of data and details of methods of assessment (measurement). Describe comparability of assessment methods if there is more than one group                                                                                                                                                                                                                                                                                   | 8-11               |
| Bias                      | 9      | Describe any efforts to address potential sources of bias                                                                                                                                                                                                                                                                                                                                                                                                              | /                  |
| Study size                | 10     | Explain how the study size was arrived at                                                                                                                                                                                                                                                                                                                                                                                                                              | 7-9                |
| Quantitative variables    | 11     | Explain how quantitative variables were handled in the analyses. If applicable, describe which groupings were chosen and why                                                                                                                                                                                                                                                                                                                                           | 9-10               |
| Statistical methods       | 12     | (a) Describe all statistical methods, including those used to control for confounding                                                                                                                                                                                                                                                                                                                                                                                  | 9-10               |
|                           |        | (b) Describe any methods used to examine subgroups and interactions                                                                                                                                                                                                                                                                                                                                                                                                    | 10                 |
|                           |        | (c) Explain how missing data were addressed                                                                                                                                                                                                                                                                                                                                                                                                                            | 7-8                |
|                           |        | (d) <i>Cohort study</i> —If applicable, explain how loss to follow-up was addressed<br><i>Case-control study</i> —If applicable, explain how matching of cases and controls was addressed                                                                                                                                                                                                                                                                              | /                  |

|                          |     |                                                                                                                                                                                                              |          |
|--------------------------|-----|--------------------------------------------------------------------------------------------------------------------------------------------------------------------------------------------------------------|----------|
|                          |     | <i>Cross-sectional study</i> —If applicable, describe analytical methods taking account of sampling strategy                                                                                                 |          |
|                          |     | (e) Describe any sensitivity analyses                                                                                                                                                                        | /        |
| <b>Results</b>           |     |                                                                                                                                                                                                              |          |
| Participants             | 13* | (a) Report numbers of individuals at each stage of study—eg numbers potentially eligible, examined for eligibility, confirmed eligible, included in the study, completing follow-up, and analysed            | 11-13    |
|                          |     | (b) Give reasons for non-participation at each stage                                                                                                                                                         | 7-8      |
|                          |     | (c) Consider use of a flow diagram                                                                                                                                                                           | 7        |
| Descriptive data         | 14* | (a) Give characteristics of study participants (eg demographic, clinical, social) and information on exposures and potential confounders                                                                     | 11-13    |
|                          |     | (b) Indicate number of participants with missing data for each variable of interest                                                                                                                          | /        |
|                          |     | (c) <i>Cohort study</i> —Summarise follow-up time (eg, average and total amount)                                                                                                                             | /        |
| Outcome data             | 15* | <i>Cohort study</i> —Report numbers of outcome events or summary measures over time                                                                                                                          | /        |
|                          |     | <i>Case-control study</i> —Report numbers in each exposure category, or summary measures of exposure                                                                                                         | /        |
|                          |     | <i>Cross-sectional study</i> —Report numbers of outcome events or summary measures                                                                                                                           | 11-13    |
| Main results             | 16  | (a) Give unadjusted estimates and, if applicable, confounder-adjusted estimates and their precision (eg, 95% confidence interval). Make clear which confounders were adjusted for and why they were included | 9, 12-15 |
|                          |     | (b) Report category boundaries when continuous variables were categorized                                                                                                                                    | 9, 12-15 |
|                          |     | (c) If relevant, consider translating estimates of relative risk into absolute risk for a meaningful time period                                                                                             | /        |
| Other analyses           | 17  | Report other analyses done—eg analyses of subgroups and interactions, and sensitivity analyses                                                                                                               | /        |
| <b>Discussion</b>        |     |                                                                                                                                                                                                              |          |
| Key results              | 18  | Summarise key results with reference to study objectives                                                                                                                                                     | 18-20    |
| Limitations              | 19  | Discuss limitations of the study, taking into account sources of potential bias or imprecision. Discuss both direction and magnitude of any potential bias                                                   | 21       |
| Interpretation           | 20  | Give a cautious overall interpretation of results considering objectives, limitations, multiplicity of analyses, results from similar studies, and other relevant evidence                                   | 21       |
| Generalisability         | 21  | Discuss the generalisability (external validity) of the study results                                                                                                                                        | 21       |
| <b>Other information</b> |     |                                                                                                                                                                                                              |          |
| Funding                  | 22  | Give the source of funding and the role of the funders for the present study and, if applicable, for the original study on which the present article is based                                                | 22       |

\*Give information separately for cases and controls in case-control studies and, if applicable, for exposed and unexposed groups in cohort and cross-sectional studies.

**Note:** An Explanation and Elaboration article discusses each checklist item and gives methodological background and published examples of transparent reporting. The STROBE checklist is best used in conjunction with this article (freely available on the Web sites of PLoS Medicine at <http://www.plosmedicine.org/>, Annals of Internal Medicine at <http://www.annals.org/>, and Epidemiology at <http://www.epidem.com/>). Information on the STROBE Initiative is available at [www.strobe-statement.org](http://www.strobe-statement.org).

# BMJ Open

## Urogenital Schistosomiasis (UGS) and Female Genital Schistosomiasis (FGS) in Cameroon: An observational assessment of key reproductive health determinants of girls and women in the Matta Health Area

|                                 |                                                                                                                                                                                                                                                                                                                                                                                                                                                                                                                                                                                                          |
|---------------------------------|----------------------------------------------------------------------------------------------------------------------------------------------------------------------------------------------------------------------------------------------------------------------------------------------------------------------------------------------------------------------------------------------------------------------------------------------------------------------------------------------------------------------------------------------------------------------------------------------------------|
| Journal:                        | <i>BMJ Open</i>                                                                                                                                                                                                                                                                                                                                                                                                                                                                                                                                                                                          |
| Manuscript ID                   | bmjopen-2022-063392.R2                                                                                                                                                                                                                                                                                                                                                                                                                                                                                                                                                                                   |
| Article Type:                   | Original research                                                                                                                                                                                                                                                                                                                                                                                                                                                                                                                                                                                        |
| Date Submitted by the Author:   | 17-Nov-2022                                                                                                                                                                                                                                                                                                                                                                                                                                                                                                                                                                                              |
| Complete List of Authors:       | Makia, Christine Masong; Catholic University of Central Africa, Social Sciences and Management<br>Fesuh, Nono Bertrand; National Advanced School of Engineering, University of Yaoundé 1, Cameroon, Department of Mathematics and Physical Sciences<br>Amabo, Elvis; Malanteoun Health District<br>Gamba, Victoria A; University of Nairobi, Department of Obstetrics and Gynecology<br>Oluwole, Akinola Stephen; Federal University of Agriculture Abeokuta, Department of Pure and Applied Zoology<br>Stothard, Russell; Liverpool School of Tropical Medicine, Department of Tropical Disease Biology |
| <b>Primary Subject Heading</b>: | Public health                                                                                                                                                                                                                                                                                                                                                                                                                                                                                                                                                                                            |
| Secondary Subject Heading:      | Infectious diseases, Epidemiology                                                                                                                                                                                                                                                                                                                                                                                                                                                                                                                                                                        |
| Keywords:                       | Epidemiology < TROPICAL MEDICINE, PARASITOLOGY, Colposcopy < GYNAECOLOGY, Infection control < INFECTIOUS DISEASES                                                                                                                                                                                                                                                                                                                                                                                                                                                                                        |
|                                 |                                                                                                                                                                                                                                                                                                                                                                                                                                                                                                                                                                                                          |

SCHOLARONE™  
Manuscripts





I, the Submitting Author has the right to grant and does grant on behalf of all authors of the Work (as defined in the below author licence), an exclusive licence and/or a non-exclusive licence for contributions from authors who are: i) UK Crown employees; ii) where BMJ has agreed a CC-BY licence shall apply, and/or iii) in accordance with the terms applicable for US Federal Government officers or employees acting as part of their official duties; on a worldwide, perpetual, irrevocable, royalty-free basis to BMJ Publishing Group Ltd ("BMJ") its licensees and where the relevant Journal is co-owned by BMJ to the co-owners of the Journal, to publish the Work in this journal and any other BMJ products and to exploit all rights, as set out in our [licence](#).

The Submitting Author accepts and understands that any supply made under these terms is made by BMJ to the Submitting Author unless you are acting as an employee on behalf of your employer or a postgraduate student of an affiliated institution which is paying any applicable article publishing charge ("APC") for Open Access articles. Where the Submitting Author wishes to make the Work available on an Open Access basis (and intends to pay the relevant APC), the terms of reuse of such Open Access shall be governed by a Creative Commons licence – details of these licences and which [Creative Commons](#) licence will apply to this Work are set out in our licence referred to above.

Other than as permitted in any relevant BMJ Author's Self Archiving Policies, I confirm this Work has not been accepted for publication elsewhere, is not being considered for publication elsewhere and does not duplicate material already published. I confirm all authors consent to publication of this Work and authorise the granting of this licence.

1  
2  
3 1 **Title:** Urogenital Schistosomiasis (UGS) and Female Genital Schistosomiasis (FGS) in Cameroon: An  
4 2 observational assessment of key reproductive health determinants of girls and women in the Matta  
5 3 Health Area  
6  
7  
8  
9 4

10 5 **Authors:** Makia Christine Masong<sup>1\*</sup>, Fesuh Nono Bertrand<sup>2</sup>, Amabo Elvis Ngwa<sup>3</sup>, Victoria A. Gamba<sup>4</sup>,  
11 6 Akinola Stephen Oluwole<sup>5</sup>, J. Russell Stothard<sup>6</sup>  
12  
13  
14  
15 7

16  
17  
18 8 <sup>1</sup>Department of Social Sciences and Management, Catholic University of Central Africa, Yaoundé,  
19 9 Cameroon  
20  
21

22  
23 10 <sup>2</sup>Department of Mathematics and Physical Sciences, National Advanced School of Engineering,  
24 11 University of Yaoundé 1, Cameroon  
25  
26

27 12 <sup>3</sup>Malanteoun Health District, Malanteoun, Cameroon  
28  
29

30 13 <sup>4</sup>Department of Obstetrics and Gynecology, University of Nairobi, Nairobi, Kenya  
31  
32

33 14 <sup>5</sup>Department of Pure and Applied Zoology, Federal University of Agriculture, Abeokuta, Nigeria  
34  
35

36 15 <sup>6</sup>Department of Tropical Disease Biology, Liverpool School of Tropical Medicine, Liverpool, L3 5QA,  
37 16 UK  
38  
39

40 17  
41  
42  
43 18 **\*Corresponding author**

44  
45 19 Makia Christine Masong  
46

47 20 Department of Social Sciences and Management, Catholic University of Central Africa, Yaoundé, Cameroon  
48

49 21 Projet MTN/OCEAC  
50

51 22 [masongbye@yahoo.com](mailto:masongbye@yahoo.com)  
52  
53

54 23  
55

56 24  
57

58 25  
59  
60

1  
2  
3 26 **Abstract**  
4

5 27 **Objectives and Setting:** Across sub-Saharan Africa, urogenital schistosomiasis (UGS), in particular  
6  
7 28 female genital schistosomiasis (FGS) is a significant waterborne parasitic disease, with its direct burden  
8  
9 29 upon the sexual and reproductive health (SRH) of sufferers infrequently measured. UGS has an  
10  
11 30 established control plan, which in most endemic regions as in Cameroon, still excludes FGS  
12  
13 31 considerations. Highlighting existent associations between UGS and FGS could increase the  
14  
15 32 management of FGS within UGS interventions. This study seeks to identify current associations  
16  
17 33 amongst FGS and UGS with some reproductive health indicators, to provide formative information for  
18  
19 34 better integrated control.  
20  
21  
22

23 35 **Participants:** 304 females aged 5 - 69 years, were all examined for UGS by urine filtration and  
24  
25 36 microscopy. Amongst these, 193 women and girls were eligible for clinical FGS assessment based on  
26  
27 37 age (>13). After selective questioning for FGS symptoms, a sub-group of 67 women and girls consented  
28  
29 38 for clinical examination for FGS using portable colposcopy, with observed sequelae classified according  
30  
31 39 to the WHO FGS pocket atlas.  
32  
33

34 40 **Outcome:** Overall UGS and FGS prevalence was measured, with FGS/UGS related reproductive health  
35  
36 41 symptoms recorded. Associations between FGS and UGS were investigated by univariate and  
37  
38 42 multivariate logistic regression analyses.  
39  
40

41 43 **Results:** Overall UGS prevalence was 63.8% (194/304), where FGS prevalence (sub-group) was 50.7%  
42  
43 44 (34/67). FGS manifestation increased significantly with increasing age, whilst a significant decrease  
44  
45 45 with ascending age was observed for UGS. Lower abdominal pain (LAP) vaginal itches (VI), and coital  
46  
47 46 pain (CP), were identified as the main significant shared symptoms of both FGS and UGS, while LAP  
48  
49 47 with menstrual irregularity (MI) appeared a strong symptomatic indicator for FGS.  
50  
51

52 48 **Conclusion:** LAP, MI, CP and VI are potential SRH indicators that could be exploited in future for  
53  
54 49 targeting of praziquantel provision to FGS sufferers within primary care, complementary with existing  
55  
56 50 Praziquantel distribution for UGS sufferers in *S. haematobium* endemic areas.  
57  
58  
59  
60

1  
2  
3 51 **Keywords:** *Schistosoma haematobium*, SRH, clinical colposcopy, questionnaires, menstrual health,  
4  
5 52 abdominal pain  
6  
7  
8 53

9  
10  
11 54 **Strengths and Limitations of this study**  
12

13 55 **Strength**

14  
15  
16 56 - This study used clinical colposcopy, which is the recommended diagnostic method for FGS, though  
17  
18 57 not very common within primary health care settings in sub-Saharan Africa.

19  
20 58 - Here, questionnaire approach is used to better capture individual experiences of FGS sufferers within  
21  
22 59 endemic areas for UGS.

23  
24 60 - Clinical diagnosis of girls younger than 14 (about half of the study participants) was not considered,  
25  
26 61 because of the invasive nature of colposcopy examination, especially as non-invasive clinical diagnostic  
27  
28 62 tools are lacking for examination amongst this age group within low resource schistosomiasis endemic  
29  
30 63 communities.

31 64 - Clinical diagnosis for FGS was carried out only on a limited sample

32  
33 65 - Assessment for STIs amongst participants are not presented here, whereby such results could  
34  
35 66 complement or clarify FGS diagnosis, considering most sexual and reproductive health related  
36  
37 67 symptoms for urogenital schistosomiasis present as sexually transmitted infections, and can be  
38  
39 68 misdiagnosed.

40  
41  
42  
43  
44  
45  
46  
47  
48  
49  
50  
51  
52  
53  
54  
55  
56  
57  
58  
59  
60

70

71

72

73

74

75

76

77 **Introduction**

1  
2  
3 78 In endemic areas, a definitive diagnosis of urogenital schistosomiasis (UGS) is established by  
4  
5 79 demonstration of viable *Schistosoma (S) haematobium* eggs ( $\geq 1$ ) in urine or hematuria[1-3], whilst  
6  
7 80 female genital schistosomiasis (FGS) can be diagnosed visually[4] for *S. haematobium* induced cervical  
8  
9 81 lesions and small fibrotic nodules known as “sandy patches”[5], either with the presence or absence of  
10  
11 82 *S. haematobium* eggs in urine[4, 6, 7]. Whilst both FGS and UGS are caused by infection with  
12  
13 83 *Schistosoma haematobium*[1, 4, 8, 9] a waterborne blood fluke, each appear to have some unclear  
14  
15 84 epidemiological associations, largely due to insufficient disease surveillance[6, 7, 10-13]. In sub-  
16  
17 85 Saharan Africa where UGS is endemic and can be highly prevalent ( $>50\%$ )[14, 15], insufficient or  
18  
19 86 infrequent efforts have been undertaken to document FGS specifically[11, 16-18], partly as the clinical  
20  
21 87 skills to do so are lacking and uninformed within primary care[10]. While active UGS does not readily  
22  
23 88 predict FGS[6], since FGS can occur without the direct presence of schistosome eggs in urine (a cardinal  
24  
25 89 diagnostic for UGS)[18, 19], rather FGS often presents with a more chronic time frame where  
26  
27 90 schistosome eggs are trapped within the cervico-vaginal surfaces[6, 20, 21]. For some, these trapped  
28  
29 91 eggs can accumulate from very early on in life[1], with enduring and typically hidden sequelae[20, 22].  
30  
31 92 Based on several biological determinants such as age[1], the mucosal damage and fibrotic scarring of  
32  
33 93 the vaginal and cervical surfaces from FGS proceeds with increasing duration of UGS[6]; moreover,  
34  
35 94 FGS-specific sequelae may be slow to resolve upon standard antiparasitic treatment of UGS[23, 24],  
36  
37 95 i.e., single annual administration of praziquantel at 40mg/g as used in public health campaigns[6, 13,  
38  
39 96 20].

40  
41  
42  
43 97 In many parts of Africa where surveillance of UGS is limited[25, 26] and that for FGS largely absent[15,  
44  
45 98 27], there is a clear need to better understand the epidemiological associations between UGS and  
46  
47 99 FGS[14]. Particularly so, to support earlier diagnosis of cases of FGS, and individualize praziquantel  
48  
49 100 treatment needs (for individual and context specific case management)[15, 28] to better avert their  
50  
51 101 disease progression[15]; as current interventions against UGS do not specifically target adolescent girls  
52  
53 102 or women[23, 29]. This gap in treatment coverage[28] and surveillance[13, 30] also has considerable  
54  
55 103 bearing on progress towards elimination of schistosomiasis transmission within disease endemic  
56  
57 104 communities[29].  
58  
59  
60

1  
2  
3 105 In recent years, FGS focused research and public health education[31] has gained traction in certain  
4  
5 106 countries such as Ghana, Tanzania, Madagascar, Nigeria, and Mozambique[8, 9], although other  
6  
7 107 countries such as Cameroon, currently lag behind[32, 33]. Schistosomiasis exists in several regions of  
8  
9 108 Cameroon[34], affecting over 10 million people in rural and urban areas[35]. The country has a national  
10  
11 109 coordinated control plan for fairly early interventions during child-hood years (from 5 – 14 years  
12  
13 110 old)[36], which take advantage of school based intervention platforms[37, 38], and in certain settings,  
14  
15 111 community based interventions, where their at-risk status (people or communities dependent on  
16  
17 112 schistosomiasis endemic water bodies, for main water source) is high[21, 32, 36, 39, 40]. Even with  
18  
19 113 improved (>70%) helminth control amongst children in the last decade [35], some of the adolescent at-  
20  
21 114 risk populations do not always benefit from praziquantel treatment due to existing policy gaps and  
22  
23 115 program intervention challenges [[15, 41, 42].

24  
25  
26 116 To address this treatment deficit, capture missed opportunities, and ensure the consideration and  
27  
28 117 apprehension of ensuing FGS manifestations within such already identified sub-groups (young girls  
29  
30 118 and women); with better knowledge on the precise associations between UGS and FGS; future control  
31  
32 119 policies and intervention campaigns can be revised to better target at-risk populations.

33  
34 120 Here, we sought to clarify existing associations between FGS and UGS, highlighting cardinal  
35  
36 121 symptomologies for scalable detection and targeted control of FGS within UGS endemic areas. This  
37  
38 122 supports the need for a future integrated approach for control of schistosomiasis and limits the “gap”  
39  
40 123 concerning FGS surveillance within current primary care.

41  
42  
43 124

## 44 45 125 **Materials and Methods**

### 46 47 48 126 **Ethics approval and consent to participate**

49  
50 127 Ethical clearance for this study was provided by the Cameroon National Ethics committee on Human  
51  
52 128 Health Research (Ref N ° 2020/07/1266/CE/CNERSH/SP), with administrative authorizations from  
53  
54 129 both the Regional Delegation of Public Health for the West region of Cameroon (Ref N°  
55  
56 130 679/L/MINSANTE/SG/DRSPO/CBF), and the district Health Office of the Malanteoun Health District  
57  
58 131 (Ref N° 078/L/MINSANTE/DRSPO/DSMLT). Informed written and oral consent was obtained from  
59  
60

1  
2  
3 132 all participants for parasitological and gynecological examinations. For participants <18 years, parents,  
4  
5 133 husbands, or guardian gave informed permission and assent was obtained from the participants. Privacy  
6  
7 134 and confidentiality of medical information were protected during and after the study.  
8  
9

### 10 135 **Patient and Public Involvement**

11  
12 136 We followed inclusive and participative methods to get overall participant and public involvement.  
13  
14 137 Tailored visits for data collection were carried out according to best practices with local engagement of  
15  
16 138 key community members and local health workers.  
17  
18

### 19 139 **Study Setting**

20  
21  
22 140 This study was carried out across a group of girls and women residing in remote communities  
23  
24 141 surrounding the Mape Dam, a known transmission focus for *Schistosoma haematobium*[35, 40] in the  
25  
26 142 Matta Health Area in Cameroon. Most study participants were involved actively in fishing or other  
27  
28 143 household activity that put them in constant contact with the lake water[33]. More than 90% of the  
29  
30 144 population lived less than 200m to infested water source (the Mape Dam), and more than 75% depended  
31  
32 145 fully on the Mape Dam for house-hold water and for an income generating activity (fishing) [13]. The  
33  
34 146 Matta Health Area hosts several remote fishing island communities that surround this man-made water  
35  
36 147 body, and for at least 18 years has witnessed high transmission of *s. haematobium* with prevalence of  
37  
38 148 UGS greater than 50% amongst children[43].  
39  
40

### 41 42 149 **Study Design and Procedures**

43  
44  
45 150 This cross-sectional study was conducted between December 2020 and June 2021. The total population  
46  
47 151 estimate of the study site was 5,000 [44], where females represented approximately 51.0%. About  
48  
49 152 54.6% of the population of females were aged 5-69 years. The sample size estimation for this study was  
50  
51 153 based on UGS prevalence (considered as key indicator for the study). With no existing records of UGS  
52  
53 154 prevalence amongst adults within the Matta Health area, a hypothesis of UGS endemicity amongst adults  
54  
55 155 was based on recorded school-age schistosomiasis prevalence (> 41% in the last decade) within the  
56  
57 156 Matta health Area[43, 45]. In this context made up of primarily fishing communities, more than 80% of  
58  
59 157 adults (both male and female) spent long stretches a day in contact with water (for economic -fishing-  
60

1  
2  
3 158 or household activity purposes) [37]. Based on this, we assumed UGS prevalence in such communities  
4  
5 159 should be higher amongst women. Hence, we resorted to an estimate of 55% for UGS prevalence in the  
6  
7 160 Matta health area, for our sample size calculation. Considering lake proximity and economic activities,  
8  
9 161 11 main communities were involved within the Matta Health Area: nine secluded water-locked fishing  
10  
11 162 communities (Islands/fishing camps) with habitations mostly less than 200m from the lake; and two  
12  
13 163 mainland communities (land-locked) with habitation more than 400m from the lake[33].

14  
15  
16 164 Following a simple random sampling technique, on the base of attaining a precision rate of 95% with  
17  
18 165 an error margin of 5%, our initial sample size was estimated using the sample size formula for prevalence  
19  
20 166 studies [46] given by  $n = N * X / (X + N - 1)$ , where  $X = Z^2 * p * (1-p) / MOE^2$ , and  $Z = Z_{\alpha/2}$  is the critical  
21  
22 167 value of the normal distribution at  $\alpha/2$  (for confidence level of 95%,  $\alpha$  is 0.05 and critical value is 1.96),  
23  
24 168 MOE is the margin of error (5%),  $p$  is an estimate of UGS prevalence in the study area (fixed at 55%),  
25  
26 169 and  $N$  is the population of females in the study area (1400). The Finite Population Correction was applied  
27  
28 170 to the sample size formula. Thus,  $n = 1400 * 3.8 / (3.8 + 1400 - 1) = 387$ . With an originally determined  
29  
30 171 sample size of 387, due to logistic and cultural constraints, 304 (78.55%) of target recruitment was  
31  
32 172 reached [33].

33  
34  
35  
36 173 A secondary objective in this study was also to find out reproductive health determinants for FGS. For  
37  
38 174 that, a sub-sample of 67 females was obtained from the 304 women enrolled in the study (Figure 1).  
39  
40 175 Eligibility criteria for this sub-group consisted of the following: being 14 years old (considered as  
41  
42 176 minimum marriage age in this context) and above, not virgin, not menstruating at present, not pregnant,  
43  
44 177 and consent/assent from parent or spouse for girls younger than 18. Hence, of the 304 participants  
45  
46 178 enrolled and tested for UGS, 193 were eligible for clinical FGS assessment based on age (Figure 1).  
47  
48 179 However, due to participant availability, logistic constraints, and consent amongst others, only 67  
49  
50 180 amongst 193 participants were available for clinical FGS diagnosis.

51  
52  
53 181 Questionnaires related to sexual and reproductive health characteristics were administered to  
54  
55 182 participants based on age and question sensitivity. Hence, varying denominators for different variables.  
56  
57  
58  
59  
60



1  
2  
3 183 Due to the secluded nature of study communities (far from health care settings), and the preference of a  
4  
5 184 participative nature for recruiting (involvement of formal/informal health workers and some community  
6  
7 185 members), recruitment was contextualized within each community as per the propositions of key  
8  
9 186 community members (including participants themselves).

11  
12 187 Within the sub-group for FGS diagnosis, after questioning (questionnaire), consenting participants  
13  
14 188 underwent gynecological examination by colposcopy with photo documentation by a trained midwife.

15  
16 189 All participants were recruited and screened within the community, mostly in their homes or a 'safe'  
17  
18 190 house prescribed by the women themselves, or the village leader.

19  
20  
21 191

22  
23 192 **Figure 1: Study participant selection criteria and numbers with diagnostic methods flow**

24  
25  
26 193

27  
28  
29 194 Thus, after UGS assessment, a structured questionnaire (see Supplementary File 1) with FGS related  
30  
31 195 symptoms [33], sexual and reproductive health, and socio-demographic questions, was administered  
32  
33 196 privately in a one-to-one format to all consenting/assenting participants, mostly based on age and  
34  
35 197 question sensitivity. For girls younger than 14, questions linked to sexual health were avoided, and other  
36  
37 198 questioning also depended on parent/guardian availability for aiding/complementing their responses or  
38  
39 199 responding directly for them. For girls/women older than 14, both reproductive and sexual health related  
40  
41 200 questions were asked where possible. Participants responded to the structured questionnaire and were  
42  
43 201 prompted to discuss further on related symptoms if they wished to share.

44  
45  
46  
47 202 Sexual and reproductive health related questions included: sexual activeness, (with age of first encounter  
48  
49 203 or age at marriage), number of children, age of last child, any miscarriage, menstrual irregularities or  
50  
51 204 abnormalities (collected as irregular, painful or ceased menstruation), abdominal pain, coital pain, and  
52  
53 205 vaginal itches with abnormal discharges. Demographic questions asked included: age, level of formal  
54  
55 206 or informal schooling achieved, water contact activities, and income generating activities. Most females  
56  
57 207 encountered during initial sample enrolment were married by age 14, which helped guide the minimum  
58  
59 208 age for the study, in terms of deciphering a general baseline for assessing girls for FGS (through general

1  
2  
3 209 sexual health related questions, and invasive gynecological examination). Also, age at marriage was  
4  
5 210 used to determine/suggest sub-fertility amongst participants as the age of first child, last child and  
6  
7 211 presence or absence of children was deciphered from the number of years in marriage (or being sexually  
8  
9 212 active) [33, 47]. Hence, sub fertility was considered as marriage age + youngest child= 4+, while  
10  
11 213 infertility referred to marriage age + no child. To better explore age-related profiles, three age groups  
12  
13 214 were formed around these context specific sexual and reproductive health characteristics: adolescence  
14  
15 215 (14-19), young adults (20-35) and older adults (36+).

16  
17  
18  
19 216

### 20 21 217 **Parasitological and Gynecological Examinations**

22  
23  
24 218 Dipstick diagnosis of microscopic hematuria[48], and urine syringe filtration technique with  
25  
26 219 microscopic-based poly-carbonate filter examination for urinary eggs, were used on a single urine  
27  
28 220 sample for standard UGS detection within this study. At least 10 ml of urine was collected and observed  
29  
30 221 for macrohematuria, tested for microhematuria and proteinuria with reagent strips (Siemens Multistix  
31  
32 222 10 SG), then analyzed for *S. haematobium* eggs, at the local health center laboratory on the same day of  
33  
34 223 collection. Microscopy for visualization of schistosome eggs was performed by x100 mag. using a light  
35  
36 224 compound microscope and stained with Lugol's iodine. A urine sample was counted positive for UGS  
37  
38 225 on the presence of hematuria[3] or at least one terminal-spined ovum seen[49]. The number of ova  
39  
40 226 reported were classified as  $\geq 50$  (high intensity) or  $< 50$  (low intensity)[2]. Next, consenting eligible  
41  
42 227 girls and women were examined by clinical colposcopy with photo-documentation, using a hand-held  
43  
44 228 colposcope (EVA COLPO, Mobile ODT). The obtained images were cross-checked against the WHO  
45  
46 229 FGS pocket atlas[5] to record key sequelae. These were then saved in a coded database for the internal  
47  
48 230 validation through blinded evaluation of cervical images from photo-colposcopy by external team  
49  
50 231 members, following the cross examination with the WHO Pocket atlas. A minimal clinical indication  
51  
52 232 for FGS was determined upon the presence of sandy patches, abnormal blood vessels and/or sandy  
53  
54 233 patches on homogenous yellow areas, in line with the WHO FGS pocket atlas coding[5] after cross  
55  
56 234 verification by external specialists.

235

## 236 **Statistical Analysis**

237 All numerical data collected were first imputed into computer system using the Microsoft excel database  
238 and later imported into the R (version 4.0.2) software for statistical analyses. In univariate analysis,  
239 frequencies and proportions were reported for socio-demographic, syndromic and clinical variables. In  
240 bivariate analysis, Pearson's chi-squared tests were used to test the association between the socio-  
241 demographic, clinical and syndromic reproductive health related variables (which serve as independent  
242 variables), against the dependent variables FGS and UGS. To further highlight such dependence,  
243 univariate logistic regression analyses was used, with the results presented in the form of unadjusted  
244 odds ratios. To identify most relevant variables amongst the reproductive health related independent  
245 variables associated to each of UGS and FGS, multivariate logistic regressions analyses were used, with  
246 the results presented in the form of adjusted odds ratios (AOR), alongside 95% confidence intervals (CI)  
247 and *p*-values based on the Wald's Test. To fit the models, only factors significantly related to the  
248 outcomes at a 25% level of significance in the univariate models were included. Multicollinearity  
249 between independent variables in the initial multivariate models were evaluated using the `vif` function  
250 in the `car` R package and our knowledge on how the variables were measured. The `step` function in  
251 the R package `stats` was applied to the resulting multivariate models after correcting for  
252 multicollinearity to select the "best" fitting model. The global significance of variables in the final  
253 models were evaluated based on analysis of deviance tables using the `anova` function in the `stats` R  
254 package. In all, the level of significance was set at *p*-value <0.05.

255

## 256 **Results**

### 257 **A. General participant characteristics**

258 A total sample population of 304 females were enrolled, and all diagnosed for UGS, aged from 5 to 69  
259 years old (193 of reproductive age, >13 and <70, with mean±SD age of 28 ±12.7). Also, 88.16%  
260 of participants were dependent on, and lived within a proximity of ≤200m to the Mape lake (Island

communities), and the remaining 11.82% came from Mainland communities, which were further from the lake (>400m), having alternative water sources (wells and stand taps), and involved in farming alone without fishing activities. A prevalence of 63.8% (194/304) for UGS was recorded from egg prevalence or hematuria. Furthermore, 27.30% showed proteinuria, and a 51.0% prevalence (155/304) was recorded for hematuria (with 19 showing macrohematuria). Microhematuria sensitivity and specificity was calculated against egg positivity, with a specificity and sensitivity of 80.00% (95% CI: 73.58 – 86.42) and 73.83% (95% CI: 66.91 – 80.75) respectively. The Geometric Mean Egg (GME) count was 33.1 (Range: 2 – 1220) among which 36.2% had heavy ( $\geq 50$  eggs/10ml of urine) infection while 63.8% had light (> 50 eggs/10ml of urine) infection. Macrohematuria was strongly related to egg density categories ( $\chi^2 = 17.7$ ;  $P < 0.001$ ), where cases of macrohematuria were directly related to heavy egg load (93.2%). Information related to sub fertility/infertility was captured based on age at marriage, number of children and the age of last child; with more than half of the study population reporting not having received treatment with praziquantel in more than a year (see Table 1). Reported sexual and reproductive health syndromes included miscarriages (58.89%), lower abdominal pain (56.95%), lower back pain (44.59%), coital pain (45.98%), coital bleeding (37.93), vaginal itches (68%), abnormal vaginal discharge (42.6%) and menstrual irregularities (47.74%), all seen to be comparatively higher amongst participants, compared to stress incontinence (19.47) (see Table 1).

Table 1: General characteristics of all study participants (Sociodemographic, syndromic, clinical)

| Variable                                             | Category    | Number of Women | Percentage |
|------------------------------------------------------|-------------|-----------------|------------|
| <b>1. Demographic</b>                                |             |                 |            |
| Age (groups)<br>( <i>n=304/304*</i> )                | <14         | 111             | 36.51      |
|                                                      | [14-20[     | 62              | 20.39      |
|                                                      | [20-36[     | 83              | 27.3       |
|                                                      | 36+         | 48              | 15.79      |
| Menarche( <i>n=304/304*</i> )                        | Pre         | 98              | 32.24      |
|                                                      | Post        | 206             | 67.76      |
| Age at marriage<br>( <i>n=178/193*</i> )             | [13-15[     | 71              | 39.89      |
|                                                      | [15-18[     | 88              | 49.44      |
|                                                      | 18+         | 19              | 10.67      |
| No of Children<br>( <i>n=181/193*</i> )              | 0           | 44              | 24.31      |
|                                                      | [1-3]       | 72              | 39.78      |
|                                                      | [26]        | 37              | 20.44      |
|                                                      | 7+          | 28              | 15.47      |
| Age of last child<br>( <i>n=130/137*</i> )           | 0+          | 10              | 7.69       |
|                                                      | [1-3]       | 67              | 51.54      |
|                                                      | [26]        | 15              | 11.54      |
|                                                      | 7+          | 38              | 29.23      |
| Treatment with praziquantel<br>( <i>n=304/304*</i> ) | < 12 months | 1               | 0.3        |
|                                                      | > 12 months | 292             | 96.1       |

|                                               |                                |     |       |
|-----------------------------------------------|--------------------------------|-----|-------|
|                                               | Never                          | 11  | 3.6   |
| Economic Activity<br>( <i>n</i> =241/304*)    | Fishing (with/without farming) | 211 | 87.5  |
|                                               | Farming (without fishing)      | 30  | 12.4  |
| Proximity to lake<br>( <i>n</i> =304/304*)    | <200m                          | 268 | 88.16 |
|                                               | >400m                          | 36  | 11.84 |
| <b>2. Syndromic</b>                           |                                |     |       |
| Lower Abdominal Pain( <i>n</i> =223/304*)     | Yes                            | 127 | 56.95 |
| Coital Pain( <i>n</i> =174/193*)              | Yes                            | 80  | 45.98 |
| Coital bleeding( <i>n</i> =174/193*)          | Yes                            | 66  | 37.93 |
| Vaginal Itches( <i>n</i> =225/304*)           | Yes                            | 153 | 68.00 |
| Vaginal Discharge( <i>n</i> =214/304*)        | Yes                            | 90  | 42.06 |
| External genital Itch( <i>n</i> =206/304*)    | Yes                            | 86  | 41.75 |
| Lower back Pain( <i>n</i> =223/304*)          | Yes                            | 99  | 44.59 |
| Stress Incontinence( <i>n</i> =226/304*)      | Yes                            | 44  | 19.47 |
| Menstrual Irregularities( <i>n</i> =199/206*) | Yes                            | 95  | 47.74 |
| Fertility( <i>n</i> =178/193*)                | Sub fertility                  | 158 | 88.8% |
|                                               | Infertility                    | 20  | 11.2% |
| Miscarriages( <i>n</i> =180/193*)             | 0                              | 74  | 41.11 |
|                                               | 1+                             | 106 | 58.89 |
| <b>3. Clinical</b>                            |                                |     |       |
| Parasitemia( <i>n</i> =304/304*)              | 0                              | 141 | 46.38 |
|                                               | [1-50]                         | 104 | 34.21 |
|                                               | 50+                            | 59  | 19.41 |
| Hematuria( <i>n</i> =304/304*)                | +                              | 155 | 51.0  |
| Proteinuria( <i>n</i> =304/304*)              | +                              | 83  | 27.30 |

\*Shows the eligible sample size for each variable. For age of marriage (*n*=178/193\*) for example, 178 out of the 193 eligible women gave information their marriage age, meaning 15 women had missing information for the variable.

### 1. UGS Characteristics amongst sample population

Table 2 presents the relationship between UGS as a dependent factor and each of the sociodemographic and reported reproductive health characteristics based on chi-square tests of independence and univariate logistic regression. The results indicate that the chances of UGS infection amongst women who lived more than 400m from the lake was 0.36 (95% CI: 0.17-0.72) times that of women who lived less than 200m to the lake, implying that significant odds of being infected with UGS was seen with closer lake proximity. A significant decrease in chances of infection with urogenital schistosomiasis was observed with increasing age. Relative to girls <14 years, girls between 14-19 years had a 0.46 (95% CI: 0.22-0.95) odds of having UGS, as opposed to 0.29 (95% CI: 0.15-0.54) odds for adults ranging from 20-35 years, and 0.09 (95% CI: 0.04-0.19) odds for women older than 35 years. All reported reproductive health syndromes showed significant relationship with UGS, except for stress incontinence (UOR 1.72 [95% CI: 0.87-3.54]  $p=0.1287$ ). In effect, women with lower abdominal pain, coital pain, vaginal itch, menstrual irregularity, and coital bleeding showed significantly higher odds (Table 2) of UGS.

295

296 **Table 2:** Relations between UGS and each socio-demographic and syndromic variable in the study  
 297 sample

| Variables                             | Category | n   | Chi2 test of Independence |                |         | Univariate logistic regression |              |         |         |
|---------------------------------------|----------|-----|---------------------------|----------------|---------|--------------------------------|--------------|---------|---------|
|                                       |          |     | UGS –<br>n (%)            | UGS +<br>n (%) | P-value | Unadjusted OR<br>(95% C.I.)    |              | P value |         |
| Age group<br>(n=304)                  | <14      | 111 | 20 (18.2)                 | 91 (46.9)      | <0.0001 | 1                              |              |         |         |
|                                       | [14-20[  | 62  | 20 (18.2)                 | 42 (21.6)      |         | 0.46                           | (0.22, 0.95) |         | 0.0352  |
|                                       | [20-36[  | 83  | 36 (32.7)                 | 47 (24.2)      |         | 0.29                           | (0.15, 0.54) |         | 0.0002  |
|                                       | 36+      | 48  | 34 (30.9)                 | 14 (7.2)       |         | 0.09                           | (0.04, 0.19) |         | <0.0001 |
| No of Children<br>(n=181)             | 0        | 44  | 15 (18.1)                 | 29 (29.6)      | 0.0462  | 1                              |              |         |         |
|                                       | [1-3]    | 72  | 33 (39.8)                 | 39 (39.8)      |         | 0.61                           | (0.28, 1.32) |         | 0.2143  |
|                                       | [4-6]    | 37  | 16 (19.3)                 | 21 (21.4)      |         | 0.68                           | (0.27, 1.67) |         | 0.3994  |
|                                       | 7+       | 28  | 19 (22.9)                 | 9 (9.2)        |         | 0.25                           | (0.09, 0.66) |         | 0.0063  |
| Age of Last Child<br>(n=130)          | 0+       | 10  | 4 (6)                     | 6 (9.5)        | 0.0323  | 1                              |              |         |         |
|                                       | [1-3]    | 67  | 33 (49.3)                 | 34 (54)        |         | 0.69                           | (0.16, 2.62) |         | 0.5863  |
|                                       | [4-6]    | 15  | 4 (6)                     | 11 (17.5)      |         | 1.83                           | (0.33, 10.6) |         | 0.4862  |
|                                       | 7+       | 38  | 26 (38.8)                 | 12 (19)        |         | 0.31                           | (0.07, 1.27) |         | 0.1082  |
| Miscarriages<br>(n=180)               | 0        | 74  | 41 (48.8)                 | 33 (34.4)      | 0.1055  | 1                              |              |         |         |
|                                       | 1        | 52  | 19 (22.6)                 | 33 (34.4)      |         | 2.16                           | (1.05, 4.52) |         | 0.0382  |
|                                       | 2+       | 54  | 24 (28.6)                 | 30 (31.2)      |         | 1.55                           | (0.77, 3.17) |         | 0.2216  |
| Lower Abdominal Pain(n=223)           | Yes      | 127 | 42 (45.2)                 | 85 (65.4)      | 0.0039  | 2.29 (1.33, 3.98)              |              | 0.0028  |         |
| Coital Pain(n=174)                    | Yes      | 80  | 25 (30.5)                 | 55 (59.8)      | 0.0001  | 3.39 (1.82, 6.43)              |              | 0.0001  |         |
| Coital bleeding(n=174)                | Yes      | 66  | 19 (23.2)                 | 47 (51.1)      | 0.0002  | 3.46 (1.82, 6.79)              |              | 0.0002  |         |
| Vaginal Itches(n=225)                 | Yes      | 153 | 51 (53.7)                 | 102 (78.5)     | 0.0001  | 3.14 (1.77, 5.67)              |              | 0.0001  |         |
| Abnormal Vaginal Discharge<br>(n=214) | Yes      | 90  | 27 (29)                   | 63 (52.1)      | 0.0008  | 2.66 (1.51, 4.76)              |              | 0.0008  |         |
| Lower Back Pain(n=222)                | Yes      | 99  | 34 (36.6)                 | 65 (50.4)      | 0.0551  | 1.76 (1.03, 3.06)              |              | 0.0416  |         |
| Stress Incontinence(n=226)            | Yes      | 44  | 14 (14.7)                 | 30 (22.9)      | 0.1729  | 1.72 (0.87, 3.54)              |              | 0.1287  |         |
| Genital Itches(n=206)                 | Yes      | 86  | 26 (28.6)                 | 60 (52.2)      | 0.0007  | 2.73 (1.53, 4.94)              |              | 0.0008  |         |
| Menstrual Irregularity(n=199)         | Yes      | 95  | 29 (33)                   | 66 (59.5)      | 0.0002  | 2.98 (1.68, 5.4)               |              | 0.0002  |         |
| Proximity to lake                     | <20m     | 268 | 89 (80.9)                 | 179 (92.3)     | 0.0051  | 1                              |              |         |         |
|                                       | >200m    | 36  | 21 (19.1)                 | 15 (7.7)       |         | 0.36                           | (0.17, 0.72) |         | 0.0042  |

298

### 299 **Multivariate Logistic Regression Model for Reporting Sexual and Reproductive Health (SRH)** 300 **Risk Factors related to UGS**

301 After including all variables significantly related to UGS at a 25% level in a multivariate model,  
 302 multicollinearity issues were suspected between lower abdominal pain and lower back pain, and external  
 303 genital itch and vaginal itches. However, considering genital itch responses were most often related to  
 304 vaginal itch or misreported by respondents due to their literal similarity in Pidgin English or Fulbe used  
 305 during questioning, we resorted to keeping only vaginal itches in the model. Similarly for lower back  
 306 pain and lower abdominal pain because of the similarity in responses, but with a more comprehensive  
 307 responding for lower abdominal pain, lower back pain was removed. The resulting “best” fitting model  
 308 included age group, lower abdominal pain, and coital pain as the most significant sexual and  
 309 reproductive health risk factors for UGS (Table 3). In this result, we also observed a decreasing trend in

number of cases of UGS with increasing age. Also, the odds of infection in women with lower abdominal pain was 6.42 (95% CI: 2.85 - 15.68) times that for women without the pain. The odds of infection in women with coital pain was 2.16 (95% CI: 1.05 – 4.46) times that for women without the pain.

**Table 3:** Possible risk factors for UGS amongst the socio-demographic and SRH included in the study. A multivariate logistic regression model on the effects of sexual and reproductive health factors significantly related to UGS.

| SRH Indicator        | Category | Adjusted OR<br>(95% C.I.) | P value |
|----------------------|----------|---------------------------|---------|
| Age group            | [14-20[  | 1.0                       |         |
|                      | 20-36[   | 0.28 (0.10, 0.70)         | 0.0087  |
|                      | 36+      | 0.11 (0.04, 0.31)         | 0.0001  |
| Lower Abdominal Pain | No       | 1.0                       |         |
|                      | Yes      | 6.42 (2.85, 15.68)        | 0.0000  |
| Coital Pain          | No       | 1.0                       |         |
|                      | Yes      | 2.16 (1.05, 4.46)         | 0.0362  |

## 2. FGS Characteristics amongst study participants (Sub-group)

Of the total number of participants examined for FGS after UGS ( $n=67$ ), 40 were confirmed to have ova-patent UGS, and 34 for FGS, upon the presence of homogenous yellow sandy patches, grainy sandy patches, and abnormal blood vessels (Figure 2). A breakdown of UGS/FGS within the subset of 67 women examined for FGS showed: 26 FGS+/UGS+; 8 FGS+/UGS-; 14 FGS-/UGS+; and 19 FGS-/UGS-. Related reproductive health syndromes (as reported in UGS), similarly, were all found to have some association ( $P < 0.05$ ) with FGS manifestation amongst females (Table 4), except for stress incontinence. Of import amongst these, menstrual irregularities or abnormality, also found with UGS, was seen to have 7.9 times higher odds of affecting women with FGS than women without FGS (Table 4). Back pain was seen to significantly affect women with FGS manifestations than was the case with UGS. Similarly, odds of having FGS manifestations were seen to ascend with age (Table 4), unlike UGS which was significant with descending age. Lower abdominal pain, menstrual irregularity and lower back pain showed the highest odds of manifesting amongst women with FGS.

**Figure 2:** Imagery of FGS pathology of the cervix with reported lesions (magnification x4)

332 **A)** 1-rubbery papule, 2-abnormal blood vessel, 3- homogeneous sandy patch (30-year-old woman,  
 333 +UGS, +lower abdominal pain, +Menstrual irregularity); **B)** 1,2- grainy sandy patches (45-year-old  
 334 woman, -UGS, +lower abdominal pain; +Menstrual irregularity)

335  
 336 **Table 4:** Relations between FGS and socio-demographic and syndromic variables in the sub-group of  
 337 girls and women diagnosed for FGS

| Variables( <i>n</i> =67) | Category | N  | Chi2 Test of Independence |               |         | Univariate logistic regression |                |         |               |        |
|--------------------------|----------|----|---------------------------|---------------|---------|--------------------------------|----------------|---------|---------------|--------|
|                          |          |    | FGS –<br>n(%)             | FGS +<br>n(%) | P-value | Unadjusted OR<br>(95% C.I.)    |                | P value |               |        |
| Age group                | [14-20[  | 19 | 15 (45.5)                 | 4 (11.8)      | 0.0091  | 1                              | (1.73, 26.1)   | 0.0077  |               |        |
|                          | [20-36[  | 29 | 11 (33.3)                 | 18 (52.9)     |         | 6.14                           |                |         |               |        |
|                          | 36+      | 19 | 7 (21.2)                  | 12 (35.3)     |         | 6.43                           |                |         | (1.62, 30.35) | 0.0116 |
| Age at Marriage          | [13-15[  | 23 | 10 (30.3)                 | 13 (38.2)     | 0.1286  | 1                              | (0.19, 1.58)   | 0.2765  |               |        |
|                          | [15-18[  | 38 | 22 (66.7)                 | 16 (47.1)     |         | 0.56                           |                |         |               |        |
|                          | 18+      | 6  | 1 (3)                     | 5 (14.7)      |         | 3.85                           |                |         | (0.51, 79.99) | 0.2510 |
| No of Children           | 0        | 16 | 12 (36.4)                 | 4 (11.8)      | 0.0363  | 1                              | (0.64, 11.23)  | 0.2024  |               |        |
|                          | [1-3]    | 22 | 12 (36.4)                 | 10 (29.4)     |         | 2.5                            |                |         |               |        |
|                          | [4-6]    | 15 | 4 (12.1)                  | 11 (32.4)     |         | 8.25                           |                |         | (1.79, 46.95) | 0.0102 |
|                          | 7+       | 14 | 5 (15.2)                  | 9 (26.5)      |         | 5.4                            |                |         | (1.19, 28.98) | 0.0357 |
| Age of Last Child        | 0+       | 1  | 1 (4.8)                   | 0 (0)         | 0.1199  | 1                              | (0, Inf)       | 0.9965  |               |        |
|                          | [1-3]    | 27 | 14 (66.7)                 | 13 (46.4)     |         | Inf                            |                |         |               |        |
|                          | [4-6]    | 4  | 0 (0)                     | 4 (14.3)      |         | Inf                            |                |         | (0, Inf)      | 0.9937 |
|                          | 7+       | 17 | 6 (28.6)                  | 11 (39.3)     |         | Inf                            |                |         | (0, Inf)      | 0.9963 |
| Miscarriages             | 0        | 26 | 18 (54.5)                 | 8 (23.5)      | 0.0362  | 1                              | (1.22, 13.78)  | 0.0256  |               |        |
|                          | 1        | 22 | 8 (24.2)                  | 14 (41.2)     |         | 3.94                           |                |         |               |        |
|                          | 2+       | 19 | 7 (21.2)                  | 12 (35.3)     |         | 3.86                           |                |         | (1.14, 14.19) | 0.0343 |
| Lower Abdominal Pain     | Yes      | 47 | 15 (45.5)                 | 32 (94.1)     | 0       | 19.2                           | (4.74, 131.08) | 0.0003  |               |        |
| Coital Pain              | Yes      | 32 | 10 (30.3)                 | 22 (64.7)     | 0.0071  | 4.22                           | (1.55, 12.16)  | 0.0058  |               |        |
| Coital bleeding          | Yes      | 29 | 8 (24.2)                  | 21 (61.8)     | 0.0029  | 5.05                           | (1.82, 15.19)  | 0.0026  |               |        |
| Vaginal Itches           | Yes      | 49 | 18 (54.5)                 | 31 (91.2)     | 0.0009  | 8.61                           | (2.44, 40.95)  | 0.0021  |               |        |
| Vaginal Discharge        | Yes      | 32 | 9 (27.3)                  | 23 (67.6)     | 0.0014  | 5.58                           | (2.01, 16.67)  | 0.0013  |               |        |
| Back Pain                | Yes      | 41 | 12 (36.4)                 | 29 (85.3)     | 0       | 10.15                          | (3.31, 36.45)  | 0.0001  |               |        |
| Stress Incontinence      | Yes      | 10 | 0 (0)                     | 10 (29.4)     | 0.0009  | Inf                            | (0, Inf)       | 0.9927  |               |        |
| Genital Itch             | Yes      | 32 | 9 (27.3)                  | 23 (67.6)     | 0.0014  | 5.58                           | (2.01, 16.67)  | 0.0013  |               |        |
| Menstrual irregularities | Yes      | 34 | 9 (27.3)                  | 25 (73.5)     | 0.0002  | 7.41                           | (2.61, 23)     | 0.0003  |               |        |
| Proximity                | <20m     | 60 | 30 (90.9)                 | 30 (88.2)     | 1       | 1                              | (0.27, 7.25)   | 0.7212  |               |        |
|                          | >200m    | 7  | 3 (9.1)                   | 4 (11.8)      | 1       | 1.33                           |                |         |               |        |

338  
 339 **Multivariate Logistic Regression Model for Reporting Sexual and Reproductive Health (SRH)**  
 340 **Risk Factors related to FGS**

341 Similar to UGS, a multivariate model was constructed with all variables significantly related to FGS at  
 342 a 25% level. As well, multicollinearity checks revealed lower back pain and genital itch (for same  
 343 reasons) with the variables age group, coital pain, vaginal itches, and lower abdominal pain (Table 5)  
 344 retained in the “best” fitting model.

345  
 346



347 **Table 5:** Possible risk factors amongst SRH for FGS. A multivariate logistic regression model on the  
 348 effects of FGS on sexual and reproductive health factors.

| SRH Indicator        | Category | Adjusted OR<br>(95% C.I.) | P value |
|----------------------|----------|---------------------------|---------|
| Age group            | [14-20[  |                           |         |
|                      | [20-36[  | 20.15 (2.92, 240.94)      | 0.0061  |
|                      | 36+      | 41.29 (4.16, 946.69)      | 0.0054  |
| Coital Pain          | No       | 1.0                       |         |
|                      | Yes      | 10.44 (2.12, 90.91)       | 0.0105  |
| Vaginal Itches       | No       | 1.0                       |         |
|                      | Yes      | 12.50 (1.92, 128.77)      | 0.0151  |
| Lower Abdominal Pain | No       | 1.0                       |         |
|                      | Yes      | 28.80 (3.36, 578.24)      | 0.0081  |

349

### 350 3. UGS, FGS and associations with reproductive health characteristics

351 Age, number of children, age of last child, menstrual abnormality, miscarriages, and lower abdominal  
 352 pain were identified as possible reproductive health factors associated with *S. haematobium* infection  
 353 and were used within this study. Generally, both FGS and UGS were not significantly ( $P$ -value  $>0.05$ )  
 354 related to number of children, age of last child and miscarriages. In multivariate logistic regression  
 355 models, after selection of the best fitting models, the results show that the most significant risk factors  
 356 for UGS are age group, lower abdominal pain and coital pain (Table 4), whereas age-group and lower  
 357 abdominal pain, coital pain and vaginal itches were identified as the most significant risk factors for  
 358 FGS (Table 5). Chances of FGS manifestations amongst women with lower abdominal pain was AOR  
 359 9.5(95% CI:1.7-81.8) times that of women without the pain (Table 5). Analysis of deviance tables for  
 360 both best fitting models (FGS and UGS), with  $p$ -values based on likelihood ratio tests are reported in  
 361 Supplementary File 2.

362

### 363 Discussion

364 Understanding the risks and associations of UGS and FGS, especially within different contexts of  
 365 women's health[41, 50], sheds greater light on the disease epidemiology, which could foster improved  
 366 and coordinated control measures both locally and nationally[41]. Furthermore, precisely documenting  
 367 existing associations between both UGS and FGS could clarify further the need for precision mapping

1  
2  
3 368 of schistosomiasis in endemic regions, for formulating a better targeted integrated response[48]. Though  
4  
5 369 a non-significant association was observed between egg intensity in urine and FGS from the onset of  
6  
7 370 this study (Table 2), parasitemia association has been shown to be misleading in UGS[7, 12, 13] from  
8  
9 371 several other studies[13] and reports on FGS, particularly when only a single urine sample is examined  
10  
11 372 which is usually the case for population-based surveillance[6]. Considering this, questionnaire (for  
12  
13 373 symptoms)[10, 21], as well as visual examination of cervix and vaginal walls by colposcopy[12, 18,  
14  
15 374 51], offers an added strength to single sample urinalysis for detection of FGS, as carried out in this study,  
16  
17 375 and several others[10, 18]. The possibility of the presence of FGS in UGS populations has been often  
18  
19 376 raised[8, 21], with projections of about 360 million girls and women possibly having UGS[15], but today  
20  
21 377 it is thought that at least 56 million adolescent girls and women are suffering from FGS[15, 17]. Our  
22  
23 378 results seem to show an even higher rate of FGS amongst the UGS infected population with an  
24  
25 379 approximate FGS/UGS ratio of 34/40. Our study, given our application of portable colposcopy, is the  
26  
27 380 first formal attempt to document the pathology of FGS in a primary care setting in Cameroon.

30  
31 381 Elsewhere, the clinical pathology of FGS has been described resulting from the complex inflammatory  
32  
33 382 responses to antigens released by adult worms and viable eggs[6, 14], which persists until sometime  
34  
35 383 after adult worms are stopped egg-laying or are destroyed by praziquantel[24]. Thereafter, various signs  
36  
37 384 and symptoms (or effects) may present months or even years after treatment[23, 42].

38  
39  
40 385 From present results, and within the general literature[15, 17], one of such effects noted is an effect on  
41  
42 386 menstrual health. More than half of women within the study who reported poor menstrual health (FGS  
43  
44 387 = 73.5%; UGS = 54.6%), either as irregular, painful or seized menstruation, were found to either shed  
45  
46 388 eggs in urine (positive for UGS), or were positive for FGS, but without eggs in urine; showing more  
47  
48 389 women positive for FGS reporting abnormal menstruation, than for UGS. This confirms recent  
49  
50 390 analysis[17, 33] and suggests strong linkages between menstrual health management and FGS[15, 17],  
51  
52 391 an under researched area. This can be credited to the fact that symptoms perhaps diminished after a  
53  
54 392 while with UGS (maybe as a result of treatment in mass drug administration campaigns), but later  
55  
56 393 resurface with more chronic sequelae of FGS[17], and with more dire symptoms and negative impact  
57  
58 394 on menstrual health[17, 33]. In our study context, post-menarche females already faced a substantial  
59  
60

1  
2  
3 395 challenge with limited access to hygienic material and information on menstrual health management,  
4  
5 396 typically relying on self-made clothes and absorbent plant leaves during menstruation, due to lack of  
6  
7 397 finances or general knowledge.  
8  
9

10 398 Still related to FGS and menstrual health, narratives from a previous study[33] which used qualitative  
11  
12 399 probing showed women having manifestations of FGS and not shedding eggs in urine, gave a history of  
13  
14 400 having lived in their earlier years in heavily infested *S. haematobium* foci. This explained their later  
15  
16 401 manifestation of FGS symptoms, even after having moved away to a less infested area, with more than  
17  
18 402 90% limit in fresh water contact[33]. This is similar to our findings, where lake proximity was seen to  
19  
20 403 be not very significant to FGS manifestation (Table 4), same as egg shedding, still pointing to early-in-  
21  
22 404 life infection and later chronicity. Significant difference in menstrual abnormalities amongst UGS  
23  
24 405 positive women [n=22(56.4)] and UGS negative women [n=12 (44.4)], alerts to future chronicity of  
25  
26 406 FGS after UGS, especially if not managed with more readily available praziquantel treatment(s)[42, 52].  
27  
28

29  
30 407 On its own, lower abdominal pain observed significant association (in adjusted and unadjusted  
31  
32 408 regression models) in both UGS and FGS. The chances of having lower abdominal pain were  
33  
34 409 significantly higher in females with either FGS (94.1%) or UGS (84.2%). Similarly with coital pain and  
35  
36 410 vaginal itches, these reported as key indicators for UGS and FGS, directing early diagnosis of UGS and  
37  
38 411 future FGS in endemic communities, thereby promoting the verticalization of control strategies for both  
39  
40 412 diseases.  
41

42  
43 413 Another trend observed in this study is that intensity of infection or egg patent-prevalence (for UGS)  
44  
45 414 reduces while chronic disease or morbidity for FGS increases as women age. The chances of FGS after  
46  
47 415 UGS increased significantly (AOR 6.43,95% C.I 1.62-30.35, P=0.0091) as women aged (36+). Similar  
48  
49 416 findings have been reported in other studies in different geographical locations[6, 14, 53, 54] and  
50  
51 417 recently in this area[33]; emphasizing on the level of present intensity for UGS, and possible future  
52  
53 418 occurrence of FGS[14, 54]. UGS at a younger age will in some cases manifest into FGS when the female  
54  
55 419 is older[14], causing more intense gynecological symptoms and effects. This offers a possible guiding  
56  
57 420 tool for better control policies, related to early diagnosis and treatment[41, 55]. This surpasses need  
58  
59  
60

1  
2  
3 421 alone for school-based MDAs[13, 28, 56], but considers and encourages individual therapy in different  
4  
5 422 contexts for FGS (and MGS)[6].  
6  
7

8 423 Although only a few amongst the extensive list of reproductive health determinants [54] were identified  
9  
10 424 in this study to be statistically significant, where mostly reported symptoms were collected, clinical and  
11  
12 425 biological examinations carried out, enabled confirmation of how future self-reported symptoms with  
13  
14 426 UGS and FGS might be best used[33]. These results support the advocated need for further attention on  
15  
16 427 post-transmission schistosomiasis[57], and also, the availability of praziquantel in lowest level (Health  
17  
18 428 Areas and community) health care for individual therapy[54], as well as treatment from a younger  
19  
20 429 age[15, 28, 41, 52], buoyed with the recent development of pediatric praziquantel[58].  
21  
22

### 23 430 **Study Limitations**

24  
25  
26 431 Though described as gold standard[49], active UGS was only detected through observation of eggs in  
27  
28 432 urine samples by microscopic-based poly-carbonate filter examination, as well as recommended dipstick  
29  
30 433 assays for urinary hematuria detection. Alternative molecular assays such as polymerase chain reaction  
31  
32 434 (PCR) for schistosome detection in human serum and urine samples[12], were not considered for added  
33  
34 435 sensitivity for UGS and FGS (in vaginal lavage analysis)[3, 59]. Though recommended[12, 21], only  
35  
36 436 visual examination through inspection for lesions on the cervix, the fornices, and the vaginal walls with  
37  
38 437 a colposcope[5, 51] and screening with questionnaires[10] was considered in the detection of FGS in  
39  
40 438 this study. Lastly, clinical diagnosis of FGS was carried out only on a limited sub-group of females,  
41  
42 439 where more precise conclusions may be obtained by using an appropriate sample size.  
43  
44  
45

### 46 440 **Conclusion**

47  
48 441 Whilst millions of women in Cameroon have UGS, its epidemiological connection with FGS is not  
49  
50 442 fully appreciated, which creates an unfortunate knowledge holdup for effective control at the public  
51  
52 443 health level. In our chosen study location, which is broadly typical for endemic areas of UGS in  
53  
54 444 Cameroon[21, 34, 36, 40], strong epidemiological associations between UGS and FGS were found  
55  
56 445 against certain key sexual and reproductive determinants: age, lower abdominal pain and menstrual  
57  
58 446 health. This formative knowledge could be utilized to tackle and ultimately prevent FGS, with a more  
59  
60

1  
2  
3 447 targeted integrated control for UGS in Cameroon and elsewhere in endemics areas for UGS globally.  
4  
5 448 This study further adds detailed insight into the connection of FGS and UGS within primary care in  
6  
7 449 endemic communities, denoting those with cardinal symptomologies more explicitly for scalable  
8  
9 450 detection and targeted control of FGS within UGS endemic areas.  
10

11 451

## 12 452 **Supporting Files**

13  
14  
15  
16 453 Supplementary File 1.docx : Structured questionnaire

17  
18 454 Supplementary File 2.docx: Deviance Table

19 455

## 20 21 22 456 **Declarations**

### 23 24 457 • **Authors' contributions**

25  
26  
27 458 MCM and JRS conceptualized the study and planned the methodology; AEN,VG, MCM, carried out  
28  
29 459 field investigation; MCM, FNB, JRS, ASO, AEN, analyzed and interpreted the data for this manuscript;  
30  
31 460 MCM acquired funding for study and wrote the original draft of the manuscript; JRS supervised the  
32  
33 461 study and was a major contributor in the conceptualization and writing of the manuscript; AEN,  
34  
35 462 coordinated field activities within the Malanteoun Health District; AEN, FNB, VG, ASO, reviewed and  
36  
37 463 edited the manuscript. All authors approved the final version of the paper before submission.  
38  
39

40 464

### 41 42 43 44 465 • **Competing interests**

45  
46  
47 466 The authors declare that they have no competing interests.  
48  
49

### 50 467 • **Funding**

51  
52  
53 468 This study is funded through a fellowship offered by "l'Organisation de Coordination pour la lutte contre  
54  
55 469 les Endémies en Afrique Centrale (OCEAC)", financed by the Ministry for Economic Cooperation and  
56  
57 470 Development (BMZ) of the Federal Republic of Germany, through the KfW (German Development  
58  
59 471 Bank). "Projet Lutte Contre Les Maladies Tropicales Négligées en Afrique Centrale" (MTN) BMZ-Nr  
60

1  
2  
3 472 2015.69.227 BMZ 2016.68.797. The funders had no role in study design, data collection and analysis,  
4  
5 473 decision to publish, or preparation of the manuscript.  
6  
7

8 474 • **Data Sharing Statement**  
9

10  
11 475 All data generated or analysed during this study are included in this published article [and its  
12  
13 476 supplementary files].  
14  
15

16  
17 477 • **Acknowledgements**  
18

19 478 We most specifically acknowledge and appreciate the immense contribution of the reviewers for this  
20  
21 479 revised and very much updated version of this manuscript. We recognize here the National Program for  
22  
23 480 the fight against Schistosomiasis and Soil-Transmitted Helminths in Cameroon (PNLSHi) for their  
24  
25 481 effort in the control of schistosomiasis in Cameroon. Thanks to the contribution of Dr Wepnje Godlove  
26  
27 482 and Marlene Nstinda Tchoffo in this research, and to all health workers and study participants at the  
28  
29 483 Matta Health Area for their support and sacrifice. We express appreciation to Dr. Savadogo Bonaventure  
30  
31 484 and Dr Patty Ngassa of the MTN-OCEAC Project for their technical advice and Coordination.  
32  
33  
34

35 485 • **License Statement**  
36

37 486 I, the Submitting Author has the right to grant and does grant on behalf of all authors of the Work (as  
38  
39 487 defined in the below author licence), an exclusive licence and/or a non-exclusive licence for  
40  
41 488 contributions from authors who are: i) UK Crown employees; ii) where BMJ has agreed a CC-BY  
42  
43 489 licence shall apply, and/or iii) in accordance with the terms applicable for US Federal Government  
44  
45 490 officers or employees acting as part of their official duties; on a worldwide, perpetual, irrevocable,  
46  
47 491 royalty-free basis to BMJ Publishing Group Ltd (“BMJ”) its licensees and where the relevant Journal is  
48  
49 492 co-owned by BMJ to the co-owners of the Journal, to publish the Work in BMJ Global Health and any  
50  
51 493 other BMJ products and to exploit all rights, as set out in our licence.  
52  
53  
54

55 494  
56 495 The Submitting Author accepts and understands that any supply made under these terms is made by  
57  
58 496 BMJ to the Submitting Author unless you are acting as an employee on behalf of your employer or a  
59  
60 497 postgraduate student of an affiliated institution which is paying any applicable article publishing charge

1  
2  
3 498 (“APC”) for Open Access articles. Where the Submitting Author wishes to make the Work available on  
4  
5 499 an Open Access basis (and intends to pay the relevant APC), the terms of reuse of such Open Access  
6  
7 500 shall be governed by a Creative Commons licence – details of these licences and which Creative  
8  
9 501 Commons licence will apply to this Work are set out in our licence referred to above.

12  
13 502 • **Consent for publication**

14  
15  
16 503 Written informed consent for publication of clinical details and/or clinical images was obtained from  
17  
18 504 the patients and parents/guardians where needed.

19  
20 505  
21  
22  
23 506 **References**

- 24  
25  
26 507 1. Freer JB, Bourke CD, Durhuus GH, Kjetland EF, Prendergast AJ. Schistosomiasis in the first  
27 508 1000 days. *The Lancet Infectious Diseases*. 2018;18(6):e193-e203.
- 28 509 2. WHO. Prevention and Control of Schistosomiasis and Soil Transmitted Helminths Geneva:  
29 510 WHO; 2002 [33/63]. Available from:  
30 511 [http://apps.who.int/iris/bitstream/handle/10665/42588/WHO\\_TRS\\_912.pdf;jsessionid=297C20DDFC](http://apps.who.int/iris/bitstream/handle/10665/42588/WHO_TRS_912.pdf;jsessionid=297C20DDFCBFFF9F9AAE9DF120C0F834?sequence=1)  
31 512 [BFFF9F9AAE9DF120C0F834?sequence=1](http://apps.who.int/iris/bitstream/handle/10665/42588/WHO_TRS_912.pdf;jsessionid=297C20DDFCBFFF9F9AAE9DF120C0F834?sequence=1).
- 32 513 3. Utzinger J, Becker SL, van Lieshout L, van Dam GJ, Knopp S. New diagnostic tools in  
33 514 schistosomiasis. *Clinical microbiology and infection : the official publication of the European Society*  
34 515 *of Clinical Microbiology and Infectious Diseases*. 2015;21(6):529-42.
- 35 516 4. Søfteland S, Sebitloane MH, Taylor M, Roald BB, Holmen S, Galappaththi-Arachchige HN, et  
36 517 al. A systematic review of handheld tools in lieu of colposcopy for cervical neoplasia and female  
37 518 genital schistosomiasis. *International Journal of Gynecology & Obstetrics*. 2021;153(2):190-9.
- 38 519 5. WHO. Female Genital Schistosomiasis: A Pocket Atlas for Clinical Health-Care Professionals  
39 520 Geneva: WHO Press; 2015 [Available from:  
40 521 <https://www.who.int/publications/i/item/9789241509299>.
- 41 522 6. Kjetland E, Leutscher P, Ndhlovu P. A review of female genital schistosomiasis. *Trends in*  
42 523 *Parasitology*. 2012;28(2):58-65.
- 43 524 7. Poggensee G, Kiwelu I, Saria M, Richter J, Krantz I, Feldmeier H. Schistosomiasis of the lower  
44 525 reproductive tract without egg excretion in urine. *The American journal of tropical medicine and*  
45 526 *hygiene*. 1998;59(5):782-3.
- 46 527 8. Christinet V, Lazdins-Helds J, Stothard J, Reinhard-Rupp J. Female genital schistosomiasis  
47 528 (FGS): from case reports to a call for concerted action against this neglected gynaecological disease.  
48 529 *International Journal for Parasitology*. 2016;46(7):395-404.
- 49 530 9. Shams M, Khazaei S, Ghasemi E, Nazari N, Javanmardi E, Majidani H, et al. Prevalence of  
50 531 urinary schistosomiasis in women: a systematic review and meta-analysis of recently published  
51 532 literature (2016–2020). *Tropical Medicine and Health*. 2022;50(1):12.
- 52 533 10. Ekpo U, Odeyemi O, Sam-Wobo S, Onunkwor O, Mogaji H, Oluwole A, et al. Female genital  
53 534 schistosomiasis (FGS) in Ogun State, Nigeria: a pilot survey on genital symptoms and clinical findings.  
54 535 *Parasitology Open*. 2017;3:e10.
- 55 536 11. Hotez PJ, Engels D, Gyapong M, Ducker C, Malecela MN. Female Genital Schistosomiasis. *New*  
56 537 *England Journal of Medicine*. 2019;381(26):2493-5.

- 1  
2  
3 538 12. Galappaththi-Arachchige HN, Holmen S, Koukounari A, Kleppa E, Pillay P, Sebitloane M, et al.  
4 539 Evaluating diagnostic indicators of urogenital *Schistosoma haematobium* infection in young women:  
5 540 A cross sectional study in rural South Africa. *PLoS one*. 2018;13(2):e0191459.
- 6 541 13. Wiegand RE, Fleming FM, de Vlas SJ, Odiere MR, Kinung'hi S, King CH, et al. Defining  
7 542 elimination as a public health problem for schistosomiasis control programmes: beyond prevalence  
8 543 of heavy-intensity infections. *The Lancet Global Health*. 2022;10(9):e1355-e9.
- 9 544 14. Hegertun I, Gundersen S, Kleppa E, Zulu S, Gundersen S, Taylor M, et al. *S. haematobium* as a  
10 545 common cause of genital morbidity in girls: a cross-sectional study of children in South Africa. *PLoS*  
11 546 *neglected tropical diseases*. 2013;7(3):e2104.
- 12 547 15. UNAIDS. 'No more neglect:Female genital schistosomiasis and HIV.  
13 548 [www.unaids.org/en/resources/documents/2019/](http://www.unaids.org/en/resources/documents/2019/): UNAIDS; 2019.
- 14 549 16. Hotez P. Speaking of Medicine and Health [Internet]. BLOGS P, editor: PLOS BLOGS. 2013.  
15 550 Available from: [https://speakingofmedicine.plos.org/2013/05/06/female-genital-schistosomiasis-fgs-](https://speakingofmedicine.plos.org/2013/05/06/female-genital-schistosomiasis-fgs-sub-saharan-africas-secret-scourge-of-girls-and-women/)  
16 551 [sub-saharan-africas-secret-scourge-of-girls-and-women/](https://speakingofmedicine.plos.org/2013/05/06/female-genital-schistosomiasis-fgs-sub-saharan-africas-secret-scourge-of-girls-and-women/).
- 17 552 17. Stothard JR, Odiere MR, Phillips-Howard PA. Connecting Female Genital Schistosomiasis and  
18 553 Menstrual Hygiene Initiatives. *Trends in Parasitology*. 2020;38(5).
- 19 554 18. Bustinduy AL, Randriansolo B, Sturt AS, Kayuni SA, Leustcher PDC, Webster BL, et al. An  
20 555 update on female and male genital schistosomiasis and a call to integrate efforts to escalate  
21 556 diagnosis, treatment and awareness in endemic and non-endemic settings: The time is now. In:  
22 557 Rollinson D, Stothard R, editors. *Advances in Parasitology*. 115: Academic Press; 2022. p. 1-44.
- 23 558 19. Majangara Karaga R. Concealed urogenital schistosomiasis causing chronic pelvic pain: A case  
24 559 report. *Clinical Case Reports*. 2021;9(4):1860-4.
- 25 560 20. Stothard J. Female genital schistosomiasis - icebergs of morbidity ahead? *Trends in*  
26 561 *parasitology*. 2012;28(5):174-5.
- 27 562 21. Campbell S, Stothard J, O'Halloran F, Sankey D, Durant T, Ombede D, et al. Urogenital  
28 563 schistosomiasis and soil-transmitted helminthiasis (STH) in Cameroon: An epidemiological update at  
29 564 Barombi Mbo and Barombi Kotto crater lakes assessing prospects for intensified control  
30 565 interventions. *Infectious diseases of poverty*. 2017;6(1):49-.
- 31 566 22. King C. Parasites and poverty: the case of schistosomiasis. *Acta tropica*. 2010;113(2):95-104.
- 32 567 23. Kjetland EF, Mduluza T, Ndhlovu PD, Gomo E, Gwanzura L, Midzi N, et al. Genital  
33 568 schistosomiasis in women: a clinical 12-month in vivo study following treatment with praziquantel.  
34 569 *Trans R Soc Trop Med Hyg*. 2006;100(8):740-52.
- 35 570 24. Treatment of Female Genital Schistosomiasis (FGS) With Praziquantel: A Proof-of-Concept  
36 571 Study (NCT04115072) [Internet]. NIH: ClinicalTrials.gov archive. 2020 [cited 31/01/2022].
- 37 572 25. Brindley PJ, Hotez PJ. Break Out: urogenital schistosomiasis and *Schistosoma haematobium*  
38 573 infection in the post-genomic era. *PLoS Negl Trop Dis*. 2013;7(3):e1961.
- 39 574 26. Secor WE, Colley DG. When Should the Emphasis on Schistosomiasis Control Move to  
40 575 Elimination? *Trop Med Infect Dis*. 2018;3(3).
- 41 576 27. Kukula VA, MacPherson EE, Tsey IH, Stothard JR, Theobald S, Gyapong M. A major hurdle in  
42 577 the elimination of urogenital schistosomiasis revealed: Identifying key gaps in knowledge and  
43 578 understanding of female genital schistosomiasis within communities and local health workers. *PLoS*  
44 579 *neglected tropical diseases*. 2019;13(3):e0007207.
- 45 580 28. Faust CL, Osakunor DNM, Downs JA, Kayuni S, Stothard JR, Lamberton PHL, et al.  
46 581 *Schistosomiasis Control: Leave No Age Group Behind*. *Trends Parasitol*. 2020;36(7):582-91.
- 47 582 29. World Health Organisation. WHO guideline on control and elimination of human  
48 583 schistosomiasis. <https://www.who.int/publications/i/item/9789240041608>: WHO; 2022. p. 142.
- 49 584 30. Bergquist R, Yang G-J, Knopp S, Utzinger J, Tanner M. Surveillance and response: Tools and  
50 585 approaches for the elimination stage of neglected tropical diseases. *Acta Tropica*. 2015;141:229-34.
- 51 586 31. SCI Foundation. FAST PACKAGE PROJECT 2021 [Available from:  
52 587 <https://schistosomiasiscontrolinitiative.org/projects/fast-research-project>  
53 588 32. Ndassi VD, Anchang-Kimbi JK, Sumbele IUN, Ngufor LA, Nadege K, Kimbi HK. The  
54 589 epidemiological status of urogenital schistosomiasis among reproductive aged individuals in the Tiko



- 1  
2  
3 590 Health Area- a semi-urban setting in the Mount Cameroon area. PLOS Neglected Tropical Diseases.  
4 591 2021;15(1):e0008978.
- 5 592 33. Masong MC, Wepnje GB, Marlene NT, Gamba V, Mengue M-T, Kouokam E, et al. Female  
6 593 Genital Schistosomiasis (FGS) in Cameroon: A formative epidemiological and socioeconomic  
7 594 investigation in eleven rural fishing communities. PLOS Global Public Health. 2021;1(10):e0000007.  
8 595 34. TchuentÉ LAT, N'Goran EK. Schistosomiasis and soil-transmitted helminthiasis control in  
9 596 Cameroon and Côte d'Ivoire: implementing control on a limited budget. Parasitology.  
10 597 2009;136(13):1739-45.
- 11 598 35. National Program for the control of Schistosomiasis and intestinal helminthiasis MoPHC.  
12 599 Towards elimination of Schistosomiasis and Soil-transmitted Helminthiasis and in Cameroon: A road  
13 600 map for paradigm shift 2021-2030. MINSANTE, Yaoundé: MINSANTE; 2022.
- 14 601 36. National Program for the control of Schistosomiasis and intestinal helminthiasis. Progress  
15 602 Report Cameroon 2013-2019. Yaoundé: MINSANTE; 2019.
- 16 603 37. World Health Organization. Global update on implementation of preventive chemotherapy  
17 604 against neglected tropical diseases in 2018. Weekly Epidemiological Record 2019;94(38):425-38.
- 18 605 38. Crompton DWT, World Health Organization. Preventive chemotherapy in human  
19 606 helminthiasis : coordinated use of anthelmintic drugs in control interventions : a manual for health  
20 607 professionals and programme managers. Geneva: World Health Organization; 2006.
- 21 608 39. Makia C, Ozano K, Tagne M, Tchoffo M, Ngang S, Thomson R, et al. Achieving equity in UHC  
22 609 interventions: who is left behind by neglected tropical disease programmes in Cameroon? Glob  
23 610 Health Action. 2021;14(1):1886457-.
- 24 611 40. Njunda A, Ndzi E, Assob J, Kamga H, Kwenti E. Prevalence and factors associated with  
25 612 urogenital schistosomiasis among primary school children in barrage, Magba sub-division of  
26 613 Cameroon. BMC Public Health. 2017;17(1):618.
- 27 614 41. Deworming adolescent girls and women of reproductive age. Policy Brief [press release].  
28 615 Geneva: WHO2022.
- 29 616 42. Nour NM. Schistosomiasis: health effects on women. Rev Obstet Gynecol. 2010;3(1):28-32.
- 30 617 43. MINSANTE. Schistosomiasis distribution in Malanteoun Health District NTDmaps.org:  
31 618 MINSANTE; 2018 [Available from: <https://ntdmaps.org/>].
- 32 619 44. National Institute of Statistics Cameroon. Socio-economic statistics of Cameroon, 2015  
33 620 Cameroon2004-2014 [Available from: [https://cameroon.opendataforafrica.org/SESC2015/socio-](https://cameroon.opendataforafrica.org/SESC2015/socio-economic-statistics-of-cameroon-2015)  
34 621 [economic-statistics-of-cameroon-2015](https://cameroon.opendataforafrica.org/SESC2015/socio-economic-statistics-of-cameroon-2015)].
- 35 622 45. Keptcheu T, Khan P, Gustave L, Gangue T. Some Haematological Parameters among Urinary  
36 623 Schistosomiasis-Malaria Coinfected Children in Suburb of Malentouen Health District, West Region  
37 624 Cameroon. International Journal of Tropical Disease & Health. 2020:34-44.
- 38 625 46. Daniels W. Biostatistics: A foundation for analysis in the health sciences. New York: Wiley &  
39 626 sons; 1999.
- 40 627 47. Beekhuizen Hv, Sharma S. Subfertility. In: Unkels HvBaR, editor. A Textbook of Gynecology for  
41 628 Less-Resourced Locations. London NW3 3AY, UK: Global Library of Women's Medicine , Sapiens  
42 629 Publishing; 2012. p. 170.
- 43 630 48. Colley DG, Bustinduy AL, Secor WE, King CH. Human schistosomiasis. Lancet (London,  
44 631 England). 2014;383(9936):2253-64.
- 45 632 49. World Health Organisation. Schistosomiasis WHO: WHO; 2022 [cited 2022. Available from:  
46 633 <https://www.who.int/news-room/fact-sheets/detail/schistosomiasis>].
- 47 634 50. World Health Organization. Regional Office for the Western Pacific. People Centered Health  
48 635 care: A policy framework. 2007.
- 49 636 51. Kjetland EF, Norseth HM, Taylor M, Lillebø K, Kleppa E, Holmen SD, et al. Classification of the  
50 637 lesions observed in female genital schistosomiasis. International journal of gynaecology and  
51 638 obstetrics: the official organ of the International Federation of Gynaecology and Obstetrics.  
52 639 2014;127(3):227-8.
- 53 640 52. Bustinduy AL, Friedman JF, Kjetland EF, Ezeamama AE, Kabatereine NB, Stothard JR, et al.  
54 641 Expanding Praziquantel (PZQ) Access beyond Mass Drug Administration Programs: Paving a Way

- 1  
2  
3 642 Forward for a Pediatric PZQ Formulation for Schistosomiasis. PLOS Neglected Tropical Diseases.  
4 643 2016;10(9):e0004946.  
5 644 53. Chetty A, Omondi MA, Butters C, Smith KA, Katawa G, Ritter M, et al. Impact of Helminth  
6 645 Infections on Female Reproductive Health and Associated Diseases. Front Immunol. 2020;11:577516.  
7 646 54. Stothard JR, Stanton, M, Bustinduy, A, Sousa-Figueiredo, J C, Van Dam, GT, Betson, M, et al.,  
8 647 Diagnostics for schistosomiasis in Africa and Arabia: A review of present options in control and future  
9 648 needs for elimination. Cambridge core. 2014(141):1947-61.  
10 649 55. Richardson ST, Franklin AL, Rome ES, Simms-Cendan JS. Global Health: Urogenital  
11 650 Schistosomiasis in the Adolescent Girl. Journal of Pediatric and Adolescent Gynecology.  
12 651 2016;29(4):326-32.  
13 652 56. Oluwole AS, Ekpo UF, Nebe OJ, Akpan NM, Jacob SM, Amazigo UV, et al. The new WHO  
14 653 guideline for control and elimination of human schistosomiasis: implications for the Schistosomiasis  
15 654 Elimination Programme in Nigeria. Infectious Diseases of Poverty. 2022;11(1):111.  
16 655 57. Giboda M, Bergquist R. Schistosomiasis at the Crossroad to Elimination: Review of Eclipsed  
17 656 Research with Emphasis on the Post-Transmission Agenda. 2022;7(4).  
18 657 58. Pediatric Praziquantel Consortium. Contract manufacturing agreement signed for production  
19 658 of new pediatric treatment for schistosomiasis 2021 [Available from:  
20 659 <http://https://www.pediatricpraziquantelconsortium.org/>.  
21 660 59. Sturt A, Webb E, Phiri C, Mweene T, Chola N, van Dam G, et al. Genital self-sampling  
22 661 compared with cervicovaginal lavage for the diagnosis of female genital schistosomiasis in Zambian  
23 662 women: The BILHIV study. PLOS Neglected Tropical Diseases. 2020;14(7):e0008337.  
24  
25  
26  
27  
28  
29

30 664 • **Figure Legends**

31 665 **Figure 1: Study participant selection criteria and numbers with diagnostic methods flow**

32  
33  
34 666 **Figure 2: Imagery of FGS pathology of the cervix with reported lesions (magnification of x4)**

35  
36 667 **A)** 1-rubbery papule, 2-abnormal blood vessel, 3- homogeneous sandy patch (30-year-old woman, +UGS, +lower  
37 668 abdominal pain, +Menstrual irregularity); **B)** 1,2- grainy sandy patches (45-year-old woman, -UGS, +lower  
38 669 abdominal pain; +Menstrual irregularity)  
39

40 670

41  
42 671

43  
44 672

45  
46 673

47  
48 674

49  
50 675

51  
52

53  
54

55  
56

57  
58

59  
60

## Sampling Flow Diagram

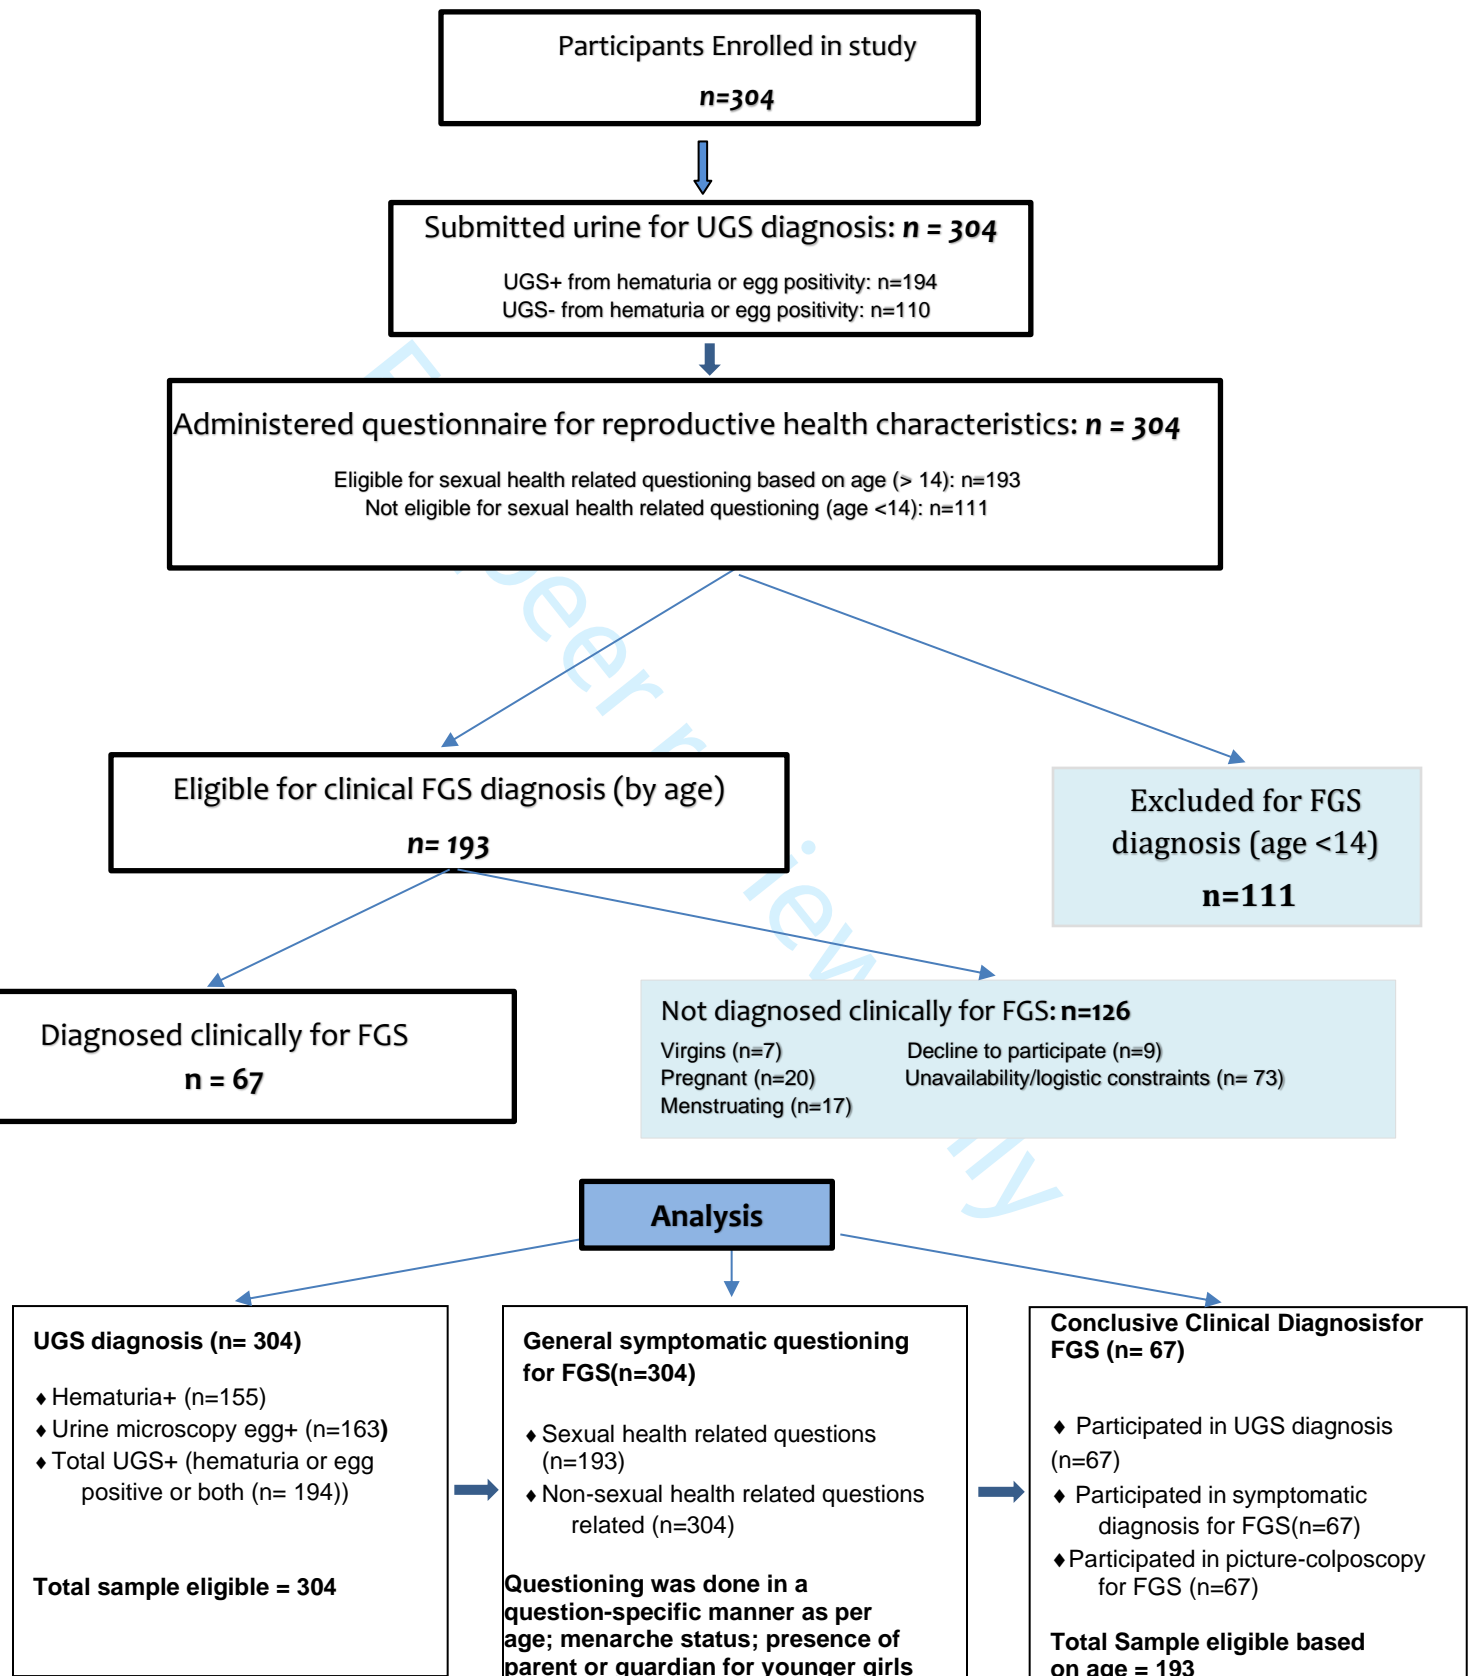

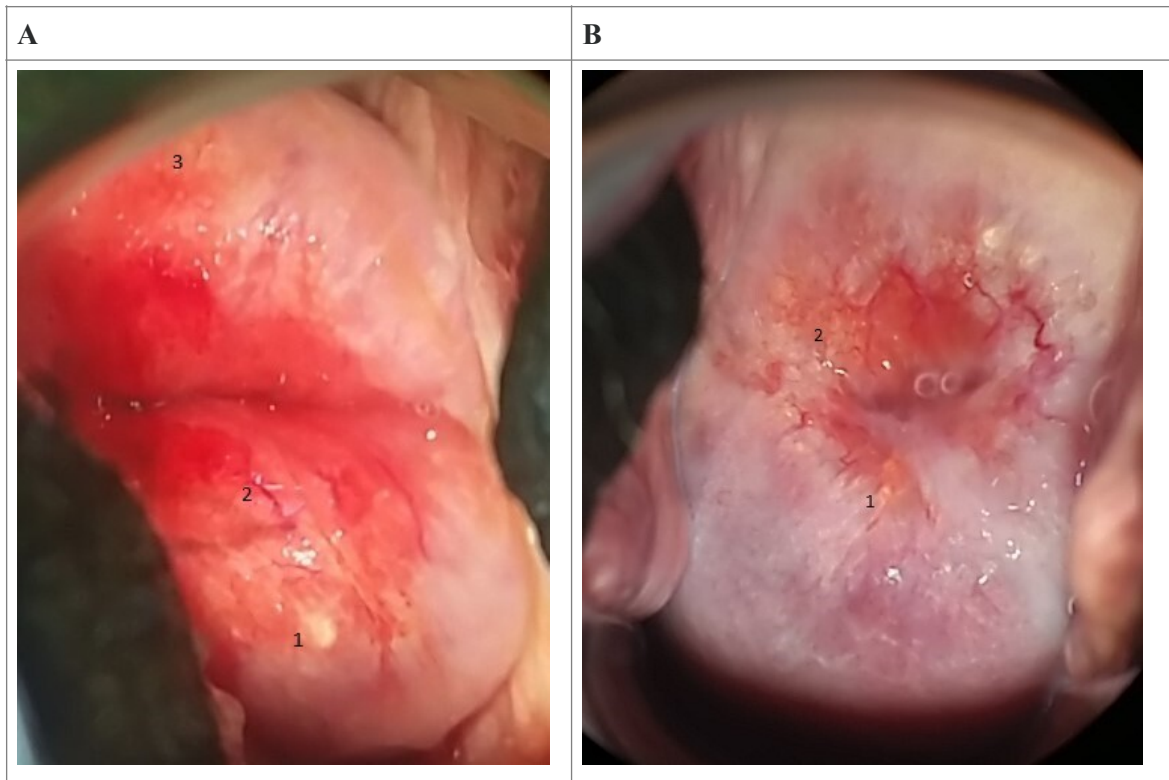

## Supplementary File 1

Close-ended structured questionnaire**A. Close ended structured questionnaire– Administered directly in English with oral translations into Fulbe, Kotoko, Mosgum, and Arab**

Name of Community: \_\_\_\_\_

Age (years): \_\_\_\_\_

Education: Informal education ( ) Formal education ( ) (specify) \_\_\_\_\_

Marital Status: Single ( ) Married ( ) Separated ( ) Widowed ( )

No of years having lived in community \_\_\_\_\_

Previous community \_\_\_\_\_

Economic activity-----

Residence ----- (collect coordinates)

**Questions on symptoms of urinary tract schistosomiasis; FGS; OR STI**

1. Do you see your menses? Yes ( ) No ( )
2. Did you observe/experience your menses within the last two weeks? Yes ( ) No ( ) Does your menses come every month? Regular?
3. Is your menses painful? \_\_\_\_\_(pain during menstruation – always very painful, sometimes painful, normal) Irregular? \_\_\_\_\_(every month?, not every month, stopped)
4. Do you have pain in your lower abdomen? When? For how long?
5. Do you have pain when urinating? Yes ( ) No ( )
6. Do you have difficulty in urinating (urine not coming out fluently)? Yes ( ) No ( )
7. Do you have sudden uncontrollable and unexpected urge to urinate and mostly cannot hold it? Even when you cough it comes out? Yes ( ) No ( )
8. Do you see blood in your urine? Yes ( ) No ( )
9. (If yes) When did you lastly see blood in your urine? \_\_\_\_\_Always, sometimes, Once in a while
10. Do you sometimes haveitching in your private part?Yes ( ) No ( )
11. How often do you experience this? Once a while ( ) frequently ( )/ When was the last time?
12. Do you have a feeling of burning within your private part? Yes ( ) No ( )

1  
2  
3 13. How often do you experience this? Once a while ( ) Frequently ( )  
4

5 14. Do you sense a swelling/lumps within your private part? Yes ( ) No ( ) No response ( )  
6

7 15. Do you have any discharge that comes from your vagina? Yes ( ) No ( ) Does it have an odour?  
8

9 \_\_\_\_\_ Do you see the colour? Yes ( ) No ( ) What Color is it? White; grey; green/yellow;  
10

11 brown  
12

13 16. Do you think this is normal? Yes ( ) No ( ) Do not know ( ). When did you start observing the  
14 discharge? Date \_\_\_\_\_  
15

16 17. After sexual intercourse do you have a discharge? Yes ( ) No ( ) Is it smelly? Yes ( ) No ( ) Do not  
17 know ( )  
18

19 18. After or during sexual intercourse do you have pain? Yes ( ) No ( ) I do not know ( ) ; Do  
20 you have a bloody discharge? Yes ( ) No ( ) I do not know ( )  
21

22 19. Have you had any miscarriages /pregnancies that passed? Yes ( ) No ( )  
23

24 20. How many? ( )  
25

26 21. Do you have children? Yes ( ) No ( )  
27

28 22. What age is your last child? ( )  
29

30 23. Have you visited the clinic to complain about these issues? Yes ( ) No ( )  
31

32 24. What you used/taken/done to treat any of these problems? \_\_\_\_\_ (Underline) Hospital  
33 or drug store/ local midwife/ traditional medicine/ prayers/ none of the above (what other?  
34 Specify)/nothing  
35  
36

### 37 **Water contact History**

38 1. Where do you fetch your household water? Lake; other source (name) \_\_\_\_\_  
39

40 2. Do you fish in the lake? Yes ( ), No ( )  
41

42 3. Do you bathe in the lake? Yes ( ), No ( )  
43

44 4. What do you use the lake for? ( ) \_\_\_\_\_  
45  
46  
47  
48  
49  
50  
51  
52  
53  
54  
55  
56  
57  
58  
59  
60

## Supplementary file 2

**Analysis of deviance tables for both best fitting models (FGS and UGS), with *p*-values based on likelihood ratio tests**

| Variable             | Df | Deviance | Resid. Df | Resid. Dev | Pr(>Chi)      |
|----------------------|----|----------|-----------|------------|---------------|
| <b>UGS</b>           |    |          |           |            |               |
| Age2                 | 2  | 19.0094  | 162       | 208.70     | 7.450e-05 *** |
| Lower Abdominal Pain | 1  | 25.6949  | 161       | 183.01     | 3.999e-07 *** |
| Coital Pain          | 1  | 4.4254   | 160       | 178.58     | 0.03541 *     |
| <b>FGS</b>           |    |          |           |            |               |
| Age2                 | 2  | 9.8057   | 64        | 83.061     | 0.0074253 **  |
| Coital Pain          | 1  | 11.3146  | 63        | 71.747     | 0.0007690 *** |
| Vaginal Itches       | 1  | 13.1740  | 62        | 58.573     | 0.0002839 *** |
| Lower Abdominal Pain | 1  | 10.5961  | 61        | 47.976     | 0.0011333 **  |

**STROBE 2007 (v4) checklist of items to be included in reports of observational studies in epidemiology\***  
**Checklist for cohort, case-control, and cross-sectional studies (combined)**

| Section/Topic             | Item # | Recommendation                                                                                                                                                                                                                                                                                                                                                                                                                                                         | Reported on page # |
|---------------------------|--------|------------------------------------------------------------------------------------------------------------------------------------------------------------------------------------------------------------------------------------------------------------------------------------------------------------------------------------------------------------------------------------------------------------------------------------------------------------------------|--------------------|
| Title and abstract        | 1      | (a) Indicate the study's design with a commonly used term in the title or the abstract                                                                                                                                                                                                                                                                                                                                                                                 | 1                  |
|                           |        | (b) Provide in the abstract an informative and balanced summary of what was done and what was found                                                                                                                                                                                                                                                                                                                                                                    | 2                  |
| <b>Introduction</b>       |        |                                                                                                                                                                                                                                                                                                                                                                                                                                                                        |                    |
| Background/rationale      | 2      | Explain the scientific background and rationale for the investigation being reported                                                                                                                                                                                                                                                                                                                                                                                   | 4-6                |
| Objectives                | 3      | State specific objectives, including any pre-specified hypotheses                                                                                                                                                                                                                                                                                                                                                                                                      | 6                  |
| <b>Methods</b>            |        |                                                                                                                                                                                                                                                                                                                                                                                                                                                                        |                    |
| Study design              | 4      | Present key elements of study design early in the paper                                                                                                                                                                                                                                                                                                                                                                                                                | 7-10               |
| Setting                   | 5      | Describe the setting, locations, and relevant dates, including periods of recruitment, exposure, follow-up, and data collection                                                                                                                                                                                                                                                                                                                                        | 7                  |
| Participants              | 6      | (a) <i>Cohort study</i> —Give the eligibility criteria, and the sources and methods of selection of participants. Describe methods of follow-up<br><i>Case-control study</i> —Give the eligibility criteria, and the sources and methods of case ascertainment and control selection. Give the rationale for the choice of cases and controls<br><i>Cross-sectional study</i> —Give the eligibility criteria, and the sources and methods of selection of participants | 8-9                |
|                           |        | (b) <i>Cohort study</i> —For matched studies, give matching criteria and number of exposed and unexposed<br><i>Case-control study</i> —For matched studies, give matching criteria and the number of controls per case                                                                                                                                                                                                                                                 | /                  |
| Variables                 | 7      | Clearly define all outcomes, exposures, predictors, potential confounders, and effect modifiers. Give diagnostic criteria, if applicable                                                                                                                                                                                                                                                                                                                               | 8-10               |
| Data sources/ measurement | 8*     | For each variable of interest, give sources of data and details of methods of assessment (measurement). Describe comparability of assessment methods if there is more than one group                                                                                                                                                                                                                                                                                   | 8-11               |
| Bias                      | 9      | Describe any efforts to address potential sources of bias                                                                                                                                                                                                                                                                                                                                                                                                              | /                  |
| Study size                | 10     | Explain how the study size was arrived at                                                                                                                                                                                                                                                                                                                                                                                                                              | 7-9                |
| Quantitative variables    | 11     | Explain how quantitative variables were handled in the analyses. If applicable, describe which groupings were chosen and why                                                                                                                                                                                                                                                                                                                                           | 9-10               |
| Statistical methods       | 12     | (a) Describe all statistical methods, including those used to control for confounding                                                                                                                                                                                                                                                                                                                                                                                  | 9-10               |
|                           |        | (b) Describe any methods used to examine subgroups and interactions                                                                                                                                                                                                                                                                                                                                                                                                    | 10                 |
|                           |        | (c) Explain how missing data were addressed                                                                                                                                                                                                                                                                                                                                                                                                                            | 7-8                |
|                           |        | (d) <i>Cohort study</i> —If applicable, explain how loss to follow-up was addressed<br><i>Case-control study</i> —If applicable, explain how matching of cases and controls was addressed                                                                                                                                                                                                                                                                              | /                  |



|                          |     |                                                                                                                                                                                                              |          |
|--------------------------|-----|--------------------------------------------------------------------------------------------------------------------------------------------------------------------------------------------------------------|----------|
|                          |     | <i>Cross-sectional study</i> —If applicable, describe analytical methods taking account of sampling strategy                                                                                                 |          |
|                          |     | (e) Describe any sensitivity analyses                                                                                                                                                                        | /        |
| <b>Results</b>           |     |                                                                                                                                                                                                              |          |
| Participants             | 13* | (a) Report numbers of individuals at each stage of study—eg numbers potentially eligible, examined for eligibility, confirmed eligible, included in the study, completing follow-up, and analysed            | 11-13    |
|                          |     | (b) Give reasons for non-participation at each stage                                                                                                                                                         | 7-8      |
|                          |     | (c) Consider use of a flow diagram                                                                                                                                                                           | 7        |
| Descriptive data         | 14* | (a) Give characteristics of study participants (eg demographic, clinical, social) and information on exposures and potential confounders                                                                     | 11-13    |
|                          |     | (b) Indicate number of participants with missing data for each variable of interest                                                                                                                          | /        |
|                          |     | (c) <i>Cohort study</i> —Summarise follow-up time (eg, average and total amount)                                                                                                                             | /        |
| Outcome data             | 15* | <i>Cohort study</i> —Report numbers of outcome events or summary measures over time                                                                                                                          | /        |
|                          |     | <i>Case-control study</i> —Report numbers in each exposure category, or summary measures of exposure                                                                                                         | /        |
|                          |     | <i>Cross-sectional study</i> —Report numbers of outcome events or summary measures                                                                                                                           | 11-13    |
| Main results             | 16  | (a) Give unadjusted estimates and, if applicable, confounder-adjusted estimates and their precision (eg, 95% confidence interval). Make clear which confounders were adjusted for and why they were included | 9, 12-15 |
|                          |     | (b) Report category boundaries when continuous variables were categorized                                                                                                                                    | 9, 12-15 |
|                          |     | (c) If relevant, consider translating estimates of relative risk into absolute risk for a meaningful time period                                                                                             | /        |
| Other analyses           | 17  | Report other analyses done—eg analyses of subgroups and interactions, and sensitivity analyses                                                                                                               | /        |
| <b>Discussion</b>        |     |                                                                                                                                                                                                              |          |
| Key results              | 18  | Summarise key results with reference to study objectives                                                                                                                                                     | 18-20    |
| Limitations              | 19  | Discuss limitations of the study, taking into account sources of potential bias or imprecision. Discuss both direction and magnitude of any potential bias                                                   | 21       |
| Interpretation           | 20  | Give a cautious overall interpretation of results considering objectives, limitations, multiplicity of analyses, results from similar studies, and other relevant evidence                                   | 21       |
| Generalisability         | 21  | Discuss the generalisability (external validity) of the study results                                                                                                                                        | 21       |
| <b>Other information</b> |     |                                                                                                                                                                                                              |          |
| Funding                  | 22  | Give the source of funding and the role of the funders for the present study and, if applicable, for the original study on which the present article is based                                                | 22       |

\*Give information separately for cases and controls in case-control studies and, if applicable, for exposed and unexposed groups in cohort and cross-sectional studies.

**Note:** An Explanation and Elaboration article discusses each checklist item and gives methodological background and published examples of transparent reporting. The STROBE checklist is best used in conjunction with this article (freely available on the Web sites of PLoS Medicine at <http://www.plosmedicine.org/>, Annals of Internal Medicine at <http://www.annals.org/>, and Epidemiology at <http://www.epidem.com/>). Information on the STROBE Initiative is available at [www.strobe-statement.org](http://www.strobe-statement.org).

# BMJ Open

## Urogenital Schistosomiasis (UGS) and Female Genital Schistosomiasis (FGS) in Cameroon: An observational assessment of key reproductive health determinants of girls and women in the Matta Health Area

|                                 |                                                                                                                                                                                                                                                                                                                                                                                                                                                                                                                                                                                                          |
|---------------------------------|----------------------------------------------------------------------------------------------------------------------------------------------------------------------------------------------------------------------------------------------------------------------------------------------------------------------------------------------------------------------------------------------------------------------------------------------------------------------------------------------------------------------------------------------------------------------------------------------------------|
| Journal:                        | <i>BMJ Open</i>                                                                                                                                                                                                                                                                                                                                                                                                                                                                                                                                                                                          |
| Manuscript ID                   | bmjopen-2022-063392.R3                                                                                                                                                                                                                                                                                                                                                                                                                                                                                                                                                                                   |
| Article Type:                   | Original research                                                                                                                                                                                                                                                                                                                                                                                                                                                                                                                                                                                        |
| Date Submitted by the Author:   | 24-Jan-2023                                                                                                                                                                                                                                                                                                                                                                                                                                                                                                                                                                                              |
| Complete List of Authors:       | Makia, Christine Masong; Catholic University of Central Africa, Social Sciences and Management<br>Fesuh, Nono Bertrand; National Advanced School of Engineering, University of Yaoundé 1, Cameroon, Department of Mathematics and Physical Sciences<br>Amabo, Elvis; Malanteoun Health District<br>Gamba, Victoria A; University of Nairobi, Department of Obstetrics and Gynecology<br>Oluwole, Akinola Stephen; Federal University of Agriculture Abeokuta, Department of Pure and Applied Zoology<br>Stothard, Russell; Liverpool School of Tropical Medicine, Department of Tropical Disease Biology |
| <b>Primary Subject Heading</b>: | Public health                                                                                                                                                                                                                                                                                                                                                                                                                                                                                                                                                                                            |
| Secondary Subject Heading:      | Infectious diseases, Epidemiology                                                                                                                                                                                                                                                                                                                                                                                                                                                                                                                                                                        |
| Keywords:                       | Epidemiology < TROPICAL MEDICINE, PARASITOLOGY, Colposcopy < GYNAECOLOGY, Infection control < INFECTIOUS DISEASES                                                                                                                                                                                                                                                                                                                                                                                                                                                                                        |
|                                 |                                                                                                                                                                                                                                                                                                                                                                                                                                                                                                                                                                                                          |

SCHOLARONE™  
Manuscripts



I, the Submitting Author has the right to grant and does grant on behalf of all authors of the Work (as defined in the below author licence), an exclusive licence and/or a non-exclusive licence for contributions from authors who are: i) UK Crown employees; ii) where BMJ has agreed a CC-BY licence shall apply, and/or iii) in accordance with the terms applicable for US Federal Government officers or employees acting as part of their official duties; on a worldwide, perpetual, irrevocable, royalty-free basis to BMJ Publishing Group Ltd ("BMJ") its licensees and where the relevant Journal is co-owned by BMJ to the co-owners of the Journal, to publish the Work in this journal and any other BMJ products and to exploit all rights, as set out in our [licence](#).

The Submitting Author accepts and understands that any supply made under these terms is made by BMJ to the Submitting Author unless you are acting as an employee on behalf of your employer or a postgraduate student of an affiliated institution which is paying any applicable article publishing charge ("APC") for Open Access articles. Where the Submitting Author wishes to make the Work available on an Open Access basis (and intends to pay the relevant APC), the terms of reuse of such Open Access shall be governed by a Creative Commons licence – details of these licences and which [Creative Commons](#) licence will apply to this Work are set out in our licence referred to above.

Other than as permitted in any relevant BMJ Author's Self Archiving Policies, I confirm this Work has not been accepted for publication elsewhere, is not being considered for publication elsewhere and does not duplicate material already published. I confirm all authors consent to publication of this Work and authorise the granting of this licence.

1  
2  
3 1 **Title:** Urogenital Schistosomiasis (UGS) and Female Genital Schistosomiasis (FGS) in Cameroon: An  
4 2 observational assessment of key reproductive health determinants of girls and women in the Matta  
5 3 Health Area  
6  
7  
8  
9 4

10 5 **Authors:** Makia Christine Masong<sup>1\*</sup>, Fesuh Nono Bertrand<sup>2</sup>, Amabo Elvis Ngwa<sup>3</sup>, Victoria A. Gamba<sup>4</sup>,  
11 6 Akinola Stephen Oluwole<sup>5</sup>, J. Russell Stothard<sup>6</sup>  
12  
13  
14  
15 7

16  
17  
18 8 <sup>1</sup>Department of Social Sciences and Management, Catholic University of Central Africa, Yaoundé,  
19 9 Cameroon  
20  
21

22  
23 10 <sup>2</sup>Department of Mathematics and Physical Sciences, National Advanced School of Engineering,  
24 11 University of Yaoundé 1, Cameroon  
25  
26

27 12 <sup>3</sup>Malantouen Health District, Malantouen, Cameroon  
28  
29

30 13 <sup>4</sup>Department of Obstetrics and Gynecology, University of Nairobi, Nairobi, Kenya  
31  
32

33 14 <sup>5</sup>Department of Pure and Applied Zoology, Federal University of Agriculture, Abeokuta, Nigeria  
34  
35

36 15 <sup>6</sup>Department of Tropical Disease Biology, Liverpool School of Tropical Medicine, Liverpool, L3 5QA,  
37 16 UK  
38  
39

40 17  
41  
42  
43 18 **\*Corresponding author**

44  
45 19 Makia Christine Masong  
46

47 20 Department of Social Sciences and Management, Catholic University of Central Africa, Yaoundé, Cameroon  
48

49 21 Projet MTN/OCEAC  
50

51 22 [masongbye@yahoo.com](mailto:masongbye@yahoo.com)  
52  
53  
54  
55  
56  
57  
58  
59 25  
60

1  
2  
3 **26 Abstract**  
4

5 **27 Objectives and Setting:** Across sub-Saharan Africa, urogenital schistosomiasis (UGS), in particular  
6  
7 **28** female genital schistosomiasis (FGS) is a significant waterborne parasitic disease, with its direct burden  
8  
9 **29** upon the sexual and reproductive health (SRH) of sufferers infrequently measured. UGS has an  
10  
11 **30** established control plan, which in most endemic regions as in Cameroon, still excludes FGS  
12  
13 **31** considerations. Highlighting existent associations between UGS and FGS could increase the  
14  
15 **32** management of FGS within UGS interventions. This study seeks to identify current associations  
16  
17 **33** amongst FGS and UGS with some reproductive health indicators, to provide formative information for  
18  
19 **34** better integrated control.  
20  
21  
22

23 **35 Participants:** 304 females aged 5 - 69 years, were all examined for UGS by urine filtration and  
24  
25 **36** microscopy. Amongst these, 193 women and girls were eligible for clinical FGS assessment based on  
26  
27 **37** age (>13). After selective questioning for FGS symptoms, a sub-group of 67 women and girls consented  
28  
29 **38** for clinical examination for FGS using portable colposcopy, with observed sequelae classified according  
30  
31 **39** to the WHO FGS pocket atlas.  
32  
33

34 **40 Outcome:** Overall UGS and FGS prevalence was measured, with FGS/UGS related reproductive health  
35  
36 **41** symptoms recorded. Associations between FGS and UGS were investigated by univariate and  
37  
38 **42** multivariate logistic regression analyses.  
39  
40

41 **43 Results:** Overall UGS prevalence was 63.8% (194/304), where FGS prevalence (sub-group) was 50.7%  
42  
43 **44** (34/67). FGS manifestation increased significantly with increasing age, whilst a significant decrease  
44  
45 **45** with ascending age was observed for UGS. Lower abdominal pain (LAP) vaginal itches (VI), and coital  
46  
47 **46** pain (CP), were identified as the main significant shared symptoms of both FGS and UGS, while LAP  
48  
49 **47** with menstrual irregularity (MI) appeared a strong symptomatic indicator for FGS.  
50  
51

52 **48 Conclusion:** LAP, MI, CP and VI are potential SRH indicators that could be exploited in future for  
53  
54 **49** targeting of praziquantel provision to FGS sufferers within primary care, complementary with existing  
55  
56 **50** Praziquantel distribution for UGS sufferers in *S. haematobium* endemic areas.  
57  
58  
59  
60

1  
2  
3 51 **Keywords:** *Schistosoma haematobium*, SRH, clinical colposcopy, questionnaires, menstrual health,  
4  
5 52 abdominal pain  
6  
7  
8 53  
9

## 10 54 **Strengths and Limitations of this study**

### 11 55 **Strengths**

- 12  
13  
14  
15  
16 56 - This study used clinical colposcopy, which is the recommended diagnostic method for FGS, though  
17  
18 57 not very common within primary health care settings in sub-Saharan Africa.  
19  
20 58 - Here, questionnaire approach is used to better capture individual experiences of FGS sufferers within  
21  
22 59 endemic areas for UGS.

### 23 60 **Limitations**

- 24  
25  
26 61 - Clinical diagnosis of girls younger than 14 (about half of the study participants) was not considered,  
27  
28 62 because of the invasive nature of colposcopy examination, especially as non-invasive clinical diagnostic  
29  
30 63 tools are lacking for examination amongst this age group within low resource schistosomiasis endemic  
31  
32 64 communities.  
33  
34 65 - Clinical diagnosis for FGS was carried out only on a limited sample  
35  
36 66 - Assessment for STIs amongst participants are not presented here, whereby such results could  
37  
38 67 complement or clarify FGS diagnosis, considering most sexual and reproductive health related  
39  
40 68 symptoms for urogenital schistosomiasis present as sexually transmitted infections, and can be  
41  
42 69 misdiagnosed.

40 70

41 71

42 72

43 73

44 74

45 75

46 76

47 77

## 48 78 **Introduction**

1  
2  
3 79 In endemic areas, a definitive diagnosis of urogenital schistosomiasis (UGS) is established by  
4  
5 80 demonstration of viable *Schistosoma (S) haematobium* eggs ( $\geq 1$ ) in urine or hematuria[1-3], whilst  
6  
7 81 female genital schistosomiasis (FGS) can be diagnosed visually[4] for *S. haematobium* induced cervical  
8  
9 82 lesions and small fibrotic nodules known as “sandy patches”[5], either with the presence or absence of  
10  
11 83 *S. haematobium* eggs in urine[4, 6, 7]. Whilst both FGS and UGS are caused by infection with  
12  
13 84 *Schistosoma haematobium*[1, 4, 8, 9] a waterborne blood fluke, each appear to have some unclear  
14  
15 85 epidemiological associations, largely due to insufficient disease surveillance[6, 7, 10-13]. In sub-  
16  
17 86 Saharan Africa where UGS is endemic and can be highly prevalent ( $>50\%$ )[14, 15], insufficient or  
18  
19 87 infrequent efforts have been undertaken to document FGS specifically[11, 16-18], partly as the clinical  
20  
21 88 skills to do so are lacking and uninformed within primary care[10]. While active UGS does not readily  
22  
23 89 predict FGS[6], since FGS can occur without the direct presence of schistosome eggs in urine (a cardinal  
24  
25 90 diagnostic for UGS)[18, 19], rather FGS often presents with a more chronic time frame where  
26  
27 91 schistosome eggs are trapped within the cervico-vaginal surfaces[6, 20, 21]. For some, these trapped  
28  
29 92 eggs can accumulate from very early on in life[1], with enduring and typically hidden sequelae[20, 22].  
30  
31 93 Based on several biological determinants such as age[1], the mucosal damage and fibrotic scarring of  
32  
33 94 the vaginal and cervical surfaces from FGS proceeds with increasing duration of UGS[6]; moreover,  
34  
35 95 FGS-specific sequelae maybe slow to resolve upon standard antiparasitic treatment of UGS[23, 24],  
36  
37 96 i.e., single annual administration of praziquantel at 40mg/g as used in public health campaigns[6, 13,  
38  
39 97 20].  
40  
41  
42  
43

44 98 In many parts of Africa where surveillance of UGS is limited[25, 26] and that for FGS largely absent[15,  
45  
46 99 27], there is a clear need to better understand the epidemiological associations between UGS and  
47  
48 100 FGS[14]. Particularly so, to support earlier diagnosis of cases of FGS, and individualize praziquantel  
49  
50 101 treatment needs (for individual and context specific case management)[15, 28] to better avert their  
51  
52 102 disease progression[15]; as current interventions against UGS do not specifically target adolescent girls  
53  
54 103 or women[23, 29]. This gap in treatment coverage[28] and surveillance[13, 30] also has considerable  
55  
56 104 bearing on progress towards elimination of schistosomiasis transmission within disease endemic  
57  
58 105 communities[29].  
59  
60

1  
2  
3 106 In recent years, FGS focused research and public health education[31] has gained traction in certain  
4  
5 107 countries such as Ghana, Tanzania, Madagascar, Nigeria, and Mozambique[8, 9], although other  
6  
7 108 countries such as Cameroon, currently lag behind[32, 33]. Schistosomiasis exists in several regions of  
8  
9 109 Cameroon[34], affecting over 10 million people in rural and urban areas[35]. The country has a national  
10  
11 110 coordinated control plan for fairly early interventions during child-hood years (from 5 – 14 years  
12  
13 111 old)[36], which take advantage of school based intervention platforms[37, 38], and in certain settings,  
14  
15 112 community based interventions, where their at-risk status (people or communities dependent on  
16  
17 113 schistosomiasis endemic water bodies, for main water source) is high[21, 32, 36, 39, 40]. Even with  
18  
19 114 improved (>70%) helminth control amongst children in the last decade [35], some of the adolescent at-  
20  
21 115 risk populations do not always benefit from praziquantel treatment due to existing policy gaps and  
22  
23 116 program intervention challenges [[15, 41, 42].

24  
25  
26 117 To address this treatment deficit, capture missed opportunities, and ensure the consideration and  
27  
28 118 apprehension of ensuing FGS manifestations within such already identified sub-groups (young girls  
29  
30 119 and women); with better knowledge on the precise associations between UGS and FGS; future control  
31  
32 120 policies and intervention campaigns can be revised to better target at-risk populations.

33  
34  
35 121 Here, we sought to clarify existing associations between FGS and UGS, highlighting cardinal  
36  
37 122 symptomologies for scalable detection and targeted control of FGS within UGS endemic areas. This  
38  
39 123 supports the need for a future integrated approach for control of schistosomiasis and limits the “gap”  
40  
41 124 concerning FGS surveillance within current primary care.

42  
43 125

## 44 45 126 **Materials and Methods**

### 46 47 48 127 **Ethics approval and consent to participate**

49  
50 128 Ethical clearance for this study was provided by the Cameroon National Ethics committee on Human  
51  
52 129 Health Research (Ref N ° 2020/07/1266/CE/CNERSH/SP), with administrative authorizations from  
53  
54 130 both the Regional Delegation of Public Health for the West region of Cameroon (Ref N°  
55  
56 131 679/L/MINSANTE/SG/DRSPO/CBF), and the district Health Office of the Malantouen Health District  
57  
58 132 (Ref N° 078/L/MINSANTE/DRSPO/DSMLT). Informed written and oral consent was obtained from  
59  
60



1  
2  
3 133 all participants for parasitological and gynecological examinations. For participants <18 years, parents,  
4  
5 134 husbands, or guardian gave informed permission and assent was obtained from the participants. Privacy  
6  
7 135 and confidentiality of medical information were protected during and after the study.  
8  
9

### 10 136 **Patient and Public Involvement**

11  
12 137 We followed inclusive and participative methods to get overall participant and public involvement.  
13  
14 138 Tailored visits for data collection were carried out according to best practices with local engagement of  
15  
16 139 key community members and local health workers.  
17  
18

### 19 140 **Study Setting**

20  
21  
22 141 This study was carried out across a group of girls and women residing in remote communities  
23  
24 142 surrounding the Mape Dam, a known transmission focus for *Schistosoma haematobium*[35, 40] in the  
25  
26 143 Matta Health Area in Cameroon. Most study participants were involved actively in fishing or other  
27  
28 144 household activity that put them in constant contact with the lake water[33]. More than 90% of the  
29  
30 145 population lived less than 200m to infested water source (the Mape Dam), and more than 75% depended  
31  
32 146 fully on the Mape Dam for house-hold water and for an income generating activity (fishing) [13]. The  
33  
34 147 Matta Health Area hosts several remote fishing island communities that surround this man-made water  
35  
36 148 body, and for at least 18 years has witnessed high transmission of *s. haematobium* with prevalence of  
37  
38 149 UGS greater than 50% amongst children[43].  
39  
40  
41

### 42 150 **Study Design and Procedures**

43  
44  
45 151 This cross-sectional study was conducted between December 2020 and June 2021. The total population  
46  
47 152 estimate of the study site was 5,000 [44], where females represented approximately 51.0%. About  
48  
49 153 54.6% of the population of females were aged 5-69 years. The sample size estimation for this study was  
50  
51 154 based on UGS prevalence (considered as key indicator for the study). With no existing records of UGS  
52  
53 155 prevalence amongst adults within the Matta Health area, a hypothesis of UGS endemicity amongst adults  
54  
55 156 was based on recorded school-age schistosomiasis prevalence (> 41% in the last decade) within the  
56  
57 157 Matta health Area[43, 45]. In this context made up of primarily fishing communities, more than 80% of  
58  
59 158 adults (both male and female) spent long stretches a day in contact with water (for economic -fishing-  
60

1  
2  
3 159 or household activity purposes) [37]. Based on this, we assumed UGS prevalence in such communities  
4  
5 160 should be higher amongst women. Hence, we resorted to an estimate of 55% for UGS prevalence in the  
6  
7 161 Matta health area, for our sample size calculation. Considering lake proximity and economic activities,  
8  
9 162 11 main communities were involved within the Matta Health Area: nine secluded water-locked fishing  
10  
11 163 communities (Islands/fishing camps) with habitations mostly less than 200m from the lake; and two  
12  
13 164 mainland communities (land-locked) with habitation more than 400m from the lake[33].  
14  
15

16 165 Following a simple random sampling technique, on the base of attaining a precision rate of 95% with  
17  
18 166 an error margin of 5%, our initial sample size was estimated using the sample size formula for prevalence  
19  
20 167 studies [46] given by  $n = N * X / (X + N - 1)$ , where  $X = Z^2 * p * (1-p) / MOE^2$ , and  $Z = Z_{\alpha/2}$  is the critical  
21  
22 168 value of the normal distribution at  $\alpha/2$  (for confidence level of 95%,  $\alpha$  is 0.05 and critical value is 1.96),  
23  
24 169 MOE is the margin of error (5%),  $p$  is an estimate of UGS prevalence in the study area (fixed at 55%),  
25  
26 170 and  $N$  is the population of females in the study area (1400). The Finite Population Correction was applied  
27  
28 171 to the sample size formula. Thus,  $n = 1400 * 3.8 / (3.8 + 1400 - 1) = 387$ . With an originally determined  
29  
30 172 sample size of 387, due to logistic and cultural constraints, 304 (78.55%) of target recruitment was  
31  
32 173 reached [33].  
33  
34  
35

36 174 A secondary objective in this study was also to find out reproductive health determinants for FGS. For  
37  
38 175 that, a sub-sample of 67 females was obtained from the 304 women enrolled in the study (Figure 1).  
39  
40 176 Eligibility criteria for this sub-group consisted of the following: being 14 years old (considered as  
41  
42 177 minimum marriage age in this context) and above, not virgin, not menstruating at present, not pregnant,  
43  
44 178 and consent/assent from parent or spouse for girls younger than 18. Hence, of the 304 participants  
45  
46 179 enrolled and tested for UGS, 193 were eligible for clinical FGS assessment based on age (Figure 1).  
47  
48 180 However, due to participant availability, logistic constraints, and consent amongst others, only 67  
49  
50 181 amongst 193 participants were available for clinical FGS diagnosis.  
51  
52

53 182 Questionnaires related to sexual and reproductive health characteristics were administered to  
54  
55 183 participants based on age and question sensitivity. Hence, varying denominators for different variables.  
56  
57  
58  
59  
60

1  
2  
3 184 Due to the secluded nature of study communities (far from health care settings), and the preference of a  
4  
5 185 participative nature for recruiting (involvement of formal/informal health workers and some community  
6  
7 186 members), recruitment was contextualized within each community as per the propositions of key  
8  
9 187 community members (including participants themselves).

11  
12 188 Within the sub-group for FGS diagnosis, after questioning (questionnaire), consenting participants  
13  
14 189 underwent gynecological examination by colposcopy with photo documentation by a trained midwife.

15  
16 190 All participants were recruited and screened within the community, mostly in their homes or a 'safe'  
17  
18 191 house prescribed by the women themselves, or the village leader.

19  
20  
21 192

22  
23 193 **Figure 1: Study participant selection criteria and numbers with diagnostic methods flow**

24  
25  
26 194

27  
28  
29 195 Thus, after UGS assessment, a structured questionnaire (see Supplementary File 1) with FGS related  
30  
31 196 symptoms [33], sexual and reproductive health, and socio-demographic questions, was administered  
32  
33 197 privately in a one-to-one format to all consenting/assenting participants, mostly based on age and  
34  
35 198 question sensitivity. For girls younger than 14, questions linked to sexual health were avoided, and other  
36  
37 199 questioning also depended on parent/guardian availability for aiding/complementing their responses or  
38  
39 200 responding directly for them. For girls/women older than 14, both reproductive and sexual health related  
40  
41 201 questions were asked where possible. Participants responded to the structured questionnaire and were  
42  
43 202 prompted to discuss further on related symptoms if they wished to share.

44  
45  
46  
47 203 Sexual and reproductive health related questions included: sexual activeness, (with age of first encounter  
48  
49 204 or age at marriage), number of children, age of last child, any miscarriage, menstrual irregularities or  
50  
51 205 abnormalities (collected as irregular, painful or ceased menstruation), abdominal pain, coital pain, and  
52  
53 206 vaginal itches with abnormal discharges. Demographic questions asked included: age, level of formal  
54  
55 207 or informal schooling achieved, water contact activities, and income generating activities. Most females  
56  
57 208 encountered during initial sample enrolment were married by age 14, which helped guide the minimum  
58  
59 209 age for the study, in terms of deciphering a general baseline for assessing girls for FGS (through general

1  
2  
3 210 sexual health related questions, and invasive gynecological examination). To better explore age-related  
4  
5 211 profiles, three age groups were formed around these context specific sexual and reproductive health  
6  
7 212 characteristics: adolescence (14-19 years), young adults (20-35 years) and older adults (36+ years). The  
8  
9 213 first age group can be considered to represent active marriage period in this study area, the second,  
10  
11 214 period of high conception probability, and third, post conception period [47].  
12  
13  
14  
15 215  
16  
17  
18 216  
19  
20  
21 217

### 217 **Parasitological and Gynecological Examinations**

22  
23  
24 218 Dipstick diagnosis of microscopic hematuria[48], and urine syringe filtration technique with  
25  
26 219 microscopic-based poly-carbonate filter examination for urinary eggs, were used on a single urine  
27  
28 220 sample for standard UGS detection within this study. At least 10 ml of urine was collected and observed  
29  
30 221 for macrohematuria, tested for microhematuria and proteinuria with reagent strips (Siemens Multistix  
31  
32 222 10 SG), then analyzed for *S. haematobium* eggs, at the local health center laboratory on the same day of  
33  
34 223 collection. Microscopy for visualization of schistosome eggs was performed by x100 mag. using a light  
35  
36 224 compound microscope and stained with Lugol's iodine. A urine sample was counted positive for UGS  
37  
38 225 on the presence of hematuria[3] or at least one terminal-spined ovum seen[49]. The number of ova  
39  
40 226 reported were classified as  $\geq 50$  (high intensity) or  $< 50$  (low intensity)[2]. Next, consenting eligible  
41  
42 227 girls and women were examined by clinical colposcopy with photo-documentation, using a hand-held  
43  
44 228 colposcope (EVA COLPO, Mobile ODT). The obtained images were cross-checked against the WHO  
45  
46 229 FGS pocket atlas[5] to record key sequelae. These were then saved in a coded database for the internal  
47  
48 230 validation through blinded evaluation of cervical images from photo-colposcopy by external team  
49  
50 231 members, following the cross examination with the WHO Pocket atlas. A minimal clinical indication  
51  
52 232 for FGS was determined upon the presence of sandy patches, abnormal blood vessels and/or sandy  
53  
54 233 patches on homogenous yellow areas, in line with the WHO FGS pocket atlas coding[5] after cross  
55  
56 234 verification by external specialists.  
57  
58  
59  
60 235

## 236 **Statistical Analysis**

237 All numerical data collected were first imputed into computer system using the Microsoft excel database  
238 and later imported into the R (version 4.0.2) software for statistical analyses. In univariate analysis,  
239 frequencies and proportions were reported for socio-demographic, syndromic and clinical variables. In  
240 bivariate analysis, Pearson's chi-squared tests were used to test the association between the socio-  
241 demographic, clinical and syndromic reproductive health related variables (which serve as independent  
242 variables), against the dependent variables FGS and UGS. To further highlight such dependence,  
243 univariate logistic regression analyses was used, with the results presented in the form of unadjusted  
244 odds ratios. To identify most relevant variables amongst the reproductive health related independent  
245 variables associated to each of UGS and FGS, multivariate logistic regressions analyses were used, with  
246 the results presented in the form of adjusted odds ratios (AOR), alongside 95% confidence intervals (CI)  
247 and *p*-values based on the Wald's Test. To fit the models, only factors significantly related to the  
248 outcomes at a 25% level of significance in the univariate models were included. Multicollinearity  
249 between independent variables in the initial multivariate models were evaluated using the `vif` function  
250 in the `car` R package and our knowledge on how the variables were measured. The step function in  
251 the R package `stats` was applied to the resulting multivariate models after correcting for  
252 multicollinearity to select the "best" fitting model. The global significance of variables in the final  
253 models were evaluated based on analysis of deviance tables using the `anova` function in the `stats` R  
254 package. In all, the level of significance was set at *p*-value <0.05.

## 256 **Results**

### 257 **A. General participant characteristics**

258 A total sample population of 304 females were enrolled. All **304 participants were assessed for UGS**  
259 **but not all participants were diagnosed with FGS. Participants** were aged from 5 to 69 years old  
260 (193 of reproductive age, >13 and <70, with mean±SD age of 28 ±12.7). Also, 88.16% of  
261 participants were dependent on, and lived within a proximity of ≤200m to the Mape lake (Island  
262 communities), and the remaining 11.82% came from Mainland communities, which were further from

the lake (>400m), having alternative water sources (wells and stand taps), and involved in farming alone without fishing activities. A prevalence of 63.8% (194/304) for UGS was recorded from egg prevalence or hematuria. Furthermore, 27.30% showed proteinuria, and a 51.0% prevalence (155/304) was recorded for hematuria (with 19 showing macrohematuria). Microhematuria sensitivity and specificity was calculated against egg positivity, with a specificity and sensitivity of 80.00% (95% CI: 73.58 – 86.42) and 73.83% (95% CI: 66.91 – 80.75) respectively. The Geometric Mean Egg (GME) count was 33.1 (Range: 2 – 1220) among which 36.2% had heavy ( $\geq 50$  eggs/10ml of urine) infection while 63.8% had light (> 50 eggs/10ml of urine) infection. Macrohematuria was strongly related to egg density categories ( $\chi^2 = 17.7$ ;  $P < 0.001$ ), where cases of macrohematuria were directly related to heavy egg load (93.2%). More than half of the study population reporting not having received treatment with praziquantel in more than a year (see Table 1). Reported sexual and reproductive health syndromes included miscarriages (58.89%), lower abdominal pain (56.95%), lower back pain (44.59%), coital pain (45.98%), coital bleeding (37.93), vaginal itches (68%), abnormal vaginal discharge (42.6%) and menstrual irregularities (47.74%), all seen to be comparatively higher amongst participants, compared to stress incontinence (19.47) (see Table 1).

Table 1: General characteristics of all study participants (Sociodemographic, syndromic, clinical)

| Variable                                             | Category                       | Number of Women | Percentage |
|------------------------------------------------------|--------------------------------|-----------------|------------|
| <b>1. Demographic</b>                                |                                |                 |            |
| Age (groups)<br>( <i>n=304/304*</i> )                | <14                            | 111             | 36.51      |
|                                                      | [14-19]                        | 62              | 20.39      |
|                                                      | [20-35]                        | 83              | 27.3       |
|                                                      | 36+                            | 48              | 15.79      |
| Menarche( <i>n=304/304*</i> )                        | Pre                            | 98              | 32.24      |
|                                                      | Post                           | 206             | 67.76      |
| Age at marriage<br>( <i>n=178/193*</i> )             | [13-14]                        | 71              | 39.89      |
|                                                      | [15-17]                        | 88              | 49.44      |
|                                                      | 18+                            | 19              | 10.67      |
| No of Children<br>( <i>n=181/193*</i> )              | 0                              | 44              | 24.31      |
|                                                      | [1-3]                          | 72              | 39.78      |
|                                                      | [4-6]                          | 37              | 20.44      |
|                                                      | 7+                             | 28              | 15.47      |
| Age of last child<br>( <i>n=130/137*</i> )           | 0+                             | 10              | 7.69       |
|                                                      | [1-3]                          | 67              | 51.54      |
|                                                      | [4-6]                          | 15              | 11.54      |
|                                                      | 7+                             | 38              | 29.23      |
| Treatment with praziquantel<br>( <i>n=304/304*</i> ) | < 12 months                    | 1               | 0.3        |
|                                                      | > 12 months                    | 292             | 96.1       |
|                                                      | Never                          | 11              | 3.6        |
| Economic Activity<br>( <i>n=241/304*</i> )           | Fishing (with/without farming) | 211             | 87.5       |
|                                                      | Farming (without fishing)      | 30              | 12.4       |
| Proximity to lake<br>( <i>n=304/304*</i> )           | <200m                          | 268             | 88.16      |
|                                                      | >400m                          | 36              | 11.84      |

| <b>2. Syndromic</b>                           |        |     |       |
|-----------------------------------------------|--------|-----|-------|
| Lower Abdominal Pain( <i>n</i> =223/304*)     | Yes    | 127 | 56.95 |
| Coital Pain( <i>n</i> =174/193*)              | Yes    | 80  | 45.98 |
| Coital bleeding( <i>n</i> =174/193*)          | Yes    | 66  | 37.93 |
| Vaginal Itches( <i>n</i> =225/304*)           | Yes    | 153 | 68.00 |
| Vaginal Discharge( <i>n</i> =214/304*)        | Yes    | 90  | 42.06 |
| External genital Itch( <i>n</i> =206/304*)    | Yes    | 86  | 41.75 |
| Lower back Pain( <i>n</i> =223/304*)          | Yes    | 99  | 44.59 |
| Stress Incontinence( <i>n</i> =226/304*)      | Yes    | 44  | 19.47 |
| Menstrual Irregularities( <i>n</i> =199/206*) | Yes    | 95  | 47.74 |
| Miscarriages( <i>n</i> =180/193*)             | 0      | 74  | 41.11 |
|                                               | 1+     | 106 | 58.89 |
| <b>3. Clinical</b>                            |        |     |       |
| Parasitemia( <i>n</i> =304/304*)              | 0      | 141 | 46.38 |
|                                               | [1-50] | 104 | 34.21 |
|                                               | 50+    | 59  | 19.41 |
| Hematuria( <i>n</i> =304/304*)                | +      | 155 | 51.0  |
| Proteinuria( <i>n</i> =304/304*)              | +      | 83  | 27.30 |

\*Shows the eligible sample size for each variable. For age of marriage (*n*=178/193\*) for example, 178 out of the 193 eligible women gave information their marriage age, meaning 15 women had missing information for the variable.

### 1. UGS Characteristics amongst sample population

Table 2 presents the relationship between UGS as a dependent factor and each of the sociodemographic and reported reproductive health characteristics based on chi-square tests of independence and univariate logistic regression. The results indicate that the chances of UGS infection amongst women who lived more than 400m from the lake was 0.36 (95% CI: 0.17-0.72) times that of women who lived less than 200m to the lake, implying that significant odds of being infected with UGS was seen with closer lake proximity. A significant decrease in chances of infection with urogenital schistosomiasis was observed with increasing age. Relative to girls <14 years, girls between 14-19 years had a 0.46 (95% CI: 0.22-0.95) odds of having UGS, as opposed to 0.29 (95% CI: 0.15-0.54) odds for adults ranging from 20-35 years, and 0.09 (95% CI: 0.04-0.19) odds for women older than 35 years. All reported reproductive health syndromes showed significant relationship with UGS, except for stress incontinence (UOR 1.72 [95% CI: 0.87-3.54] *p*= 0.1287). In effect, women with lower abdominal pain, coital pain, vaginal itch, menstrual irregularity, and coital bleeding showed significantly higher odds (Table 2) of UGS.

**Table 2:** Relations between UGS and each socio-demographic and syndromic variable in the study sample

Chi2 test of Independence

Univariate logistic regression

| Variables                             | Category | N   | UGS –<br>n (%) | UGS +<br>n (%) | P-value | Unadjusted OR<br>(95% C.I.) | P value |
|---------------------------------------|----------|-----|----------------|----------------|---------|-----------------------------|---------|
| Age group<br>(n=304)                  | <14      | 111 | 20 (18.2)      | 91 (46.9)      | <0.0001 | 1                           | 0.0352  |
|                                       | [14-19]  | 62  | 20 (18.2)      | 42 (21.6)      |         | 0.46 (0.22, 0.95)           |         |
|                                       | [20-35]  | 83  | 36 (32.7)      | 47 (24.2)      |         | 0.29 (0.15, 0.54)           |         |
|                                       | 36+      | 48  | 34 (30.9)      | 14 (7.2)       |         | 0.09 (0.04, 0.19)           |         |
| No of Children<br>(n=181)             | 0        | 44  | 15 (18.1)      | 29 (29.6)      | 0.0462  | 1                           | 0.2143  |
|                                       | [1-3]    | 72  | 33 (39.8)      | 39 (39.8)      |         | 0.61 (0.28, 1.32)           |         |
|                                       | [4-6]    | 37  | 16 (19.3)      | 21 (21.4)      |         | 0.68 (0.27, 1.67)           |         |
|                                       | 7+       | 28  | 19 (22.9)      | 9 (9.2)        |         | 0.25 (0.09, 0.66)           |         |
| Age of Last Child<br>(n=130)          | 0+       | 10  | 4 (6)          | 6 (9.5)        | 0.0323  | 1                           | 0.5863  |
|                                       | [1-3]    | 67  | 33 (49.3)      | 34 (54)        |         | 0.69 (0.16, 2.62)           |         |
|                                       | [4-6]    | 15  | 4 (6)          | 11 (17.5)      |         | 1.83 (0.33, 10.6)           |         |
|                                       | 7+       | 38  | 26 (38.8)      | 12 (19)        |         | 0.31 (0.07, 1.27)           |         |
| Miscarriages<br>(n=180)               | 0        | 74  | 41 (48.8)      | 33 (34.4)      | 0.1055  | 1                           | 0.0382  |
|                                       | 1        | 52  | 19 (22.6)      | 33 (34.4)      |         | 2.16 (1.05, 4.52)           |         |
|                                       | 2+       | 54  | 24 (28.6)      | 30 (31.2)      |         | 1.55 (0.77, 3.17)           |         |
| Lower Abdominal Pain(n=223)           | Yes      | 127 | 42 (45.2)      | 85 (65.4)      | 0.0039  | 2.29 (1.33, 3.98)           | 0.0028  |
| Coital Pain(n=174)                    | Yes      | 80  | 25 (30.5)      | 55 (59.8)      | 0.0001  | 3.39 (1.82, 6.43)           | 0.0001  |
| Coital bleeding(n=174)                | Yes      | 66  | 19 (23.2)      | 47 (51.1)      | 0.0002  | 3.46 (1.82, 6.79)           | 0.0002  |
| Vaginal Itches(n=225)                 | Yes      | 153 | 51 (53.7)      | 102 (78.5)     | 0.0001  | 3.14 (1.77, 5.67)           | 0.0001  |
| Abnormal Vaginal Discharge<br>(n=214) | Yes      | 90  | 27 (29)        | 63 (52.1)      | 0.0008  | 2.66 (1.51, 4.76)           | 0.0008  |
| Lower Back Pain(n=222)                | Yes      | 99  | 34 (36.6)      | 65 (50.4)      | 0.0551  | 1.76 (1.03, 3.06)           | 0.0416  |
| Stress Incontinence(n=226)            | Yes      | 44  | 14 (14.7)      | 30 (22.9)      | 0.1729  | 1.72 (0.87, 3.54)           | 0.1287  |
| Genital Itches(n=206)                 | Yes      | 86  | 26 (28.6)      | 60 (52.2)      | 0.0007  | 2.73 (1.53, 4.94)           | 0.0008  |
| Menstrual Irregularity(n=199)         | Yes      | 95  | 29 (33)        | 66 (59.5)      | 0.0002  | 2.98 (1.68, 5.4)            | 0.0002  |
| Proximity to lake                     | <20m     | 268 | 89 (80.9)      | 179 (92.3)     | 0.0051  | 1                           | 0.0042  |
|                                       | >200m    | 36  | 21 (19.1)      | 15 (7.7)       |         | 0.36 (0.17, 0.72)           |         |

298

## 299 Multivariate Logistic Regression Model for Reporting Sexual and Reproductive Health (SRH) 300 Risk Factors related to UGS

301 After including all variables significantly related to UGS at a 25% level in a multivariate model,  
302 multicollinearity issues were suspected between lower abdominal pain and lower back pain, and external  
303 genital itch and vaginal itches. However, considering genital itch responses were most often related to  
304 vaginal itch or misreported by respondents due to their literal similarity in Pidgin English or Fulbe used  
305 during questioning, we resorted to keeping only vaginal itches in the model. Similarly for lower back  
306 pain and lower abdominal pain because of the similarity in responses, but with a more comprehensive  
307 responding for lower abdominal pain, lower back pain was removed. The resulting “best” fitting model  
308 included age group, lower abdominal pain, and coital pain as the most significant sexual and  
309 reproductive health risk factors for UGS (Table 3). In this result, we also observed a decreasing trend in  
310 number of cases of UGS with increasing age. Also, the odds of infection in women with lower abdominal  
311 pain was 6.42 (95% CI: 2.85 - 15.68) times that for women without the pain. The odds of infection in  
312 women with coital pain was 2.16 (95% CI: 1.05 – 4.46) times that for women without the pain.

313



314 **Table 3:** Possible risk factors for UGS amongst the socio-demographic and SRH included in the study.  
 315 A multivariate logistic regression model on the effects of sexual and reproductive health factors  
 316 significantly related to UGS.

| SRH Indicator        | Category | Adjusted OR<br>(95% C.I.) | P value |
|----------------------|----------|---------------------------|---------|
| Age group            | [14-19]  | 1.0                       |         |
|                      | [20-35]  | 0.28 (0.10, 0.70)         | 0.0087  |
|                      | 36+      | 0.11 (0.04, 0.31)         | 0.0001  |
| Lower Abdominal Pain | No       | 1.0                       |         |
|                      | Yes      | 6.42 (2.85, 15.68)        | 0.0000  |
| Coital Pain          | No       | 1.0                       |         |
|                      | Yes      | 2.16 (1.05, 4.46)         | 0.0362  |

317

## 318 2. FGS Characteristics amongst study participants (Sub-group)

319 Of the total number of participants examined for FGS after UGS ( $n=67$ ), 40 were confirmed to have  
 320 ova-patent UGS, and 34 for FGS, upon the presence of homogenous yellow sandy patches, grainy sandy  
 321 patches, and abnormal blood vessels (Figure 2). A breakdown of UGS/FGS within the subset of 67  
 322 women examined for FGS showed: 26 FGS+/UGS+; 8 FGS+/UGS-; 14 FGS-/UGS+; and 19 FGS-  
 323 /UGS-. Related reproductive health syndromes (as reported in UGS), similarly, were all found to have  
 324 some association ( $P < 0.05$ ) with FGS manifestation amongst females (Table 4), except for stress  
 325 incontinence. Of import amongst these, menstrual irregularities or abnormality, also found with UGS,  
 326 was seen to have 7.9 times higher odds of affecting women with FGS than women without FGS (Table  
 327 4). Back pain was seen to significantly affect women with FGS manifestations than was the case with  
 328 UGS. Similarly, odds of having FGS manifestations were seen to ascend with age (Table 4), unlike UGS  
 329 which was significant with descending age. Lower abdominal pain, menstrual irregularity and lower  
 330 back pain showed the highest odds of manifesting amongst women with FGS.

### 331 Figure 2: Imagery of FGS pathology of the cervix with reported lesions (magnification x4)

332 **A)** 1-rubbery papule, 2-abnormal blood vessel, 3- homogeneous sandy patch (30-year-old woman,  
 333 +UGS, +lower abdominal pain, +Menstrual irregularity); **B)** 1,2- grainy sandy patches (45-year-old  
 334 woman, -UGS, +lower abdominal pain; +Menstrual irregularity)

335

336 **Table 4:** Relations between FGS and socio-demographic and syndromic variables in the sub-group of  
 337 girls and women diagnosed for FGS

| Variables(n=67)          | Category | N  | Chi2 Test of Independence |               |         | Univariate logistic regression |                |         |               |        |
|--------------------------|----------|----|---------------------------|---------------|---------|--------------------------------|----------------|---------|---------------|--------|
|                          |          |    | FGS –<br>n(%)             | FGS +<br>n(%) | P-value | Unadjusted OR<br>(95% C.I.)    |                | P value |               |        |
| Age group                | [14-19]  | 19 | 15 (45.5)                 | 4 (11.8)      | 0.0091  | 1                              | (1.73, 26.1)   | 0.0077  |               |        |
|                          | [20-35]  | 29 | 11 (33.3)                 | 18 (52.9)     |         | 6.14                           |                |         |               |        |
|                          | 36+      | 19 | 7 (21.2)                  | 12 (35.3)     |         | 6.43                           |                |         | (1.62, 30.35) | 0.0116 |
| Age at Marriage          | [13-14]  | 23 | 10 (30.3)                 | 13 (38.2)     | 0.1286  | 1                              | (0.19, 1.58)   | 0.2765  |               |        |
|                          | [15-17]  | 38 | 22 (66.7)                 | 16 (47.1)     |         | 0.56                           |                |         |               |        |
|                          | 18+      | 6  | 1 (3)                     | 5 (14.7)      |         | 3.85                           |                |         | (0.51, 79.99) | 0.2510 |
| No of Children           | 0        | 16 | 12 (36.4)                 | 4 (11.8)      | 0.0363  | 1                              | (0.64, 11.23)  | 0.2024  |               |        |
|                          | [1-3]    | 22 | 12 (36.4)                 | 10 (29.4)     |         | 2.5                            |                |         |               |        |
|                          | [4-6]    | 15 | 4 (12.1)                  | 11 (32.4)     |         | 8.25                           |                |         | (1.79, 46.95) | 0.0102 |
|                          | 7+       | 14 | 5 (15.2)                  | 9 (26.5)      |         | 5.4                            |                |         | (1.19, 28.98) | 0.0357 |
| Age of Last Child        | 0+       | 1  | 1 (4.8)                   | 0 (0)         | 0.1199  | 1                              | (0, Inf)       | 0.9965  |               |        |
|                          | [1-3]    | 27 | 14 (66.7)                 | 13 (46.4)     |         | Inf                            |                |         |               |        |
|                          | [4-6]    | 4  | 0 (0)                     | 4 (14.3)      |         | Inf                            |                |         | (0, Inf)      | 0.9937 |
|                          | 7+       | 17 | 6 (28.6)                  | 11 (39.3)     |         | Inf                            |                |         | (0, Inf)      | 0.9963 |
| Miscarriages             | 0        | 26 | 18 (54.5)                 | 8 (23.5)      | 0.0362  | 1                              | (1.22, 13.78)  | 0.0256  |               |        |
|                          | 1        | 22 | 8 (24.2)                  | 14 (41.2)     |         | 3.94                           |                |         |               |        |
|                          | 2+       | 19 | 7 (21.2)                  | 12 (35.3)     |         | 3.86                           |                |         | (1.14, 14.19) | 0.0343 |
| Lower Abdominal Pain     | Yes      | 47 | 15 (45.5)                 | 32 (94.1)     | 0       | 19.2                           | (4.74, 131.08) | 0.0003  |               |        |
| Coital Pain              | Yes      | 32 | 10 (30.3)                 | 22 (64.7)     | 0.0071  | 4.22                           | (1.55, 12.16)  | 0.0058  |               |        |
| Coital bleeding          | Yes      | 29 | 8 (24.2)                  | 21 (61.8)     | 0.0029  | 5.05                           | (1.82, 15.19)  | 0.0026  |               |        |
| Vaginal Itches           | Yes      | 49 | 18 (54.5)                 | 31 (91.2)     | 0.0009  | 8.61                           | (2.44, 40.95)  | 0.0021  |               |        |
| Vaginal Discharge        | Yes      | 32 | 9 (27.3)                  | 23 (67.6)     | 0.0014  | 5.58                           | (2.01, 16.67)  | 0.0013  |               |        |
| Back Pain                | Yes      | 41 | 12 (36.4)                 | 29 (85.3)     | 0       | 10.15                          | (3.31, 36.45)  | 0.0001  |               |        |
| Stress Incontinence      | Yes      | 10 | 0 (0)                     | 10 (29.4)     | 0.0009  | Inf                            | (0, Inf)       | 0.9927  |               |        |
| Genital Itch             | Yes      | 32 | 9 (27.3)                  | 23 (67.6)     | 0.0014  | 5.58                           | (2.01, 16.67)  | 0.0013  |               |        |
| Menstrual irregularities | Yes      | 34 | 9 (27.3)                  | 25 (73.5)     | 0.0002  | 7.41                           | (2.61, 23)     | 0.0003  |               |        |
| Proximity                | <20m     | 60 | 30 (90.9)                 | 30 (88.2)     | 1       | 1                              | (0.27, 7.25)   | 0.7212  |               |        |
|                          | >200m    | 7  | 3 (9.1)                   | 4 (11.8)      | 1       | 1.33                           |                |         |               |        |

338

### 339 Multivariate Logistic Regression Model for Reporting Sexual and Reproductive Health (SRH) 340 Risk Factors related to FGS

341 Similar to UGS, a multivariate model was constructed with all variables significantly related to FGS at  
342 a 25% level. As well, multicollinearity checks revealed lower back pain and genital itch (for same  
343 reasons) with the variables age group, coital pain, vaginal itches, and lower abdominal pain (Table 5)  
344 retained in the “best” fitting model.

345

346

347 **Table 5:** Possible risk factors amongst SRH for FGS. A multivariate logistic regression model on the  
348 effects of FGS on sexual and reproductive health factors.

| SRH Indicator  | Category | Adjusted OR<br>(95% C.I.) | P value |
|----------------|----------|---------------------------|---------|
| Age group      | [14-19]  |                           |         |
|                | [20-35]  | 20.15 (2.92, 240.94)      | 0.0061  |
|                | 36+      | 41.29 (4.16, 946.69)      | 0.0054  |
| Coital Pain    | No       | 1.0                       |         |
|                | Yes      | 10.44 (2.12, 90.91)       | 0.0105  |
| Vaginal Itches | No       | 1.0                       |         |
|                | Yes      | 12.50 (1.92, 128.77)      | 0.0151  |

|                      |     |                      |        |
|----------------------|-----|----------------------|--------|
| Lower Abdominal Pain | No  | 1.0                  |        |
|                      | Yes | 28.80 (3.36, 578.24) | 0.0081 |

349

### 3. UGS, FGS and associations with reproductive health characteristics

Age, number of children, age of last child, menstrual abnormality, miscarriages, and lower abdominal pain were identified as possible reproductive health factors associated with *S. haematobium* infection and were used within this study. Generally, both FGS and UGS were not significantly ( $P$ -value  $>0.05$ ) related to number of children, age of last child and miscarriages. In multivariate logistic regression models, after selection of the best fitting models, the results show that the most significant risk factors for UGS are age group, lower abdominal pain and coital pain (Table 4), whereas age-group and lower abdominal pain, coital pain and vaginal itches were identified as the most significant risk factors for FGS (Table 5). Chances of FGS manifestations amongst women with lower abdominal pain was AOR 9.5 (95% CI: 1.7-81.8) times that of women without the pain (Table 5). Analysis of deviance tables for both best fitting models (FGS and UGS), with  $p$ -values based on likelihood ratio tests are reported in Supplementary File 2.

362

### Discussion

Understanding the risks and associations of UGS and FGS, especially within different contexts of women's health [41, 50], sheds greater light on the disease epidemiology, which could foster improved and coordinated control measures both locally and nationally [41]. Furthermore, precisely documenting existing associations between both UGS and FGS could clarify further the need for precision mapping of schistosomiasis in endemic regions, for formulating a better targeted integrated response [48]. Though a non-significant association was observed between egg intensity in urine and FGS from the onset of this study (Table 2), parasitemia association has been shown to be misleading in UGS [7, 12, 13] from several other studies [13] and reports on FGS, particularly when only a single urine sample is examined which is usually the case for population-based surveillance [6]. Considering this, questionnaire (for symptoms) [10, 21], as well as visual examination of cervix and vaginal walls by colposcopy [12, 18,

1  
2  
3 374 51], offers an added strength to single sample urinalysis for detection of FGS, as carried out in this study,  
4  
5 375 and several others[10, 18]. The possibility of the presence of FGS in UGS populations has been often  
6  
7 376 raised[8, 21], with projections of about 360 million girls and women possibly having UGS[15], but today  
8  
9 377 it is thought that at least 56 million adolescent girls and women are suffering from FGS[15, 17]. Our  
10  
11 378 results seem to show an even higher rate of FGS amongst the UGS infected population with an  
12  
13 379 approximate FGS/UGS ratio of 34/40. Our study, given our application of portable colposcopy, is the  
14  
15 380 first formal attempt to document the pathology of FGS in a primary care setting in Cameroon.

16  
17  
18 381 Elsewhere, the clinical pathology of FGS has been described resulting from the complex inflammatory  
19  
20 382 responses to antigens released by adult worms and viable eggs[6, 14], which persists until sometime  
21  
22 383 after adult worms are stopped egg-laying or are destroyed by praziquantel[24]. Thereafter, various signs  
23  
24 384 and symptoms (or effects) may present months or even years after treatment[23, 42].

25  
26  
27 385 From present results, and within the general literature[15, 17], one of such effects noted is an effect on  
28  
29 386 menstrual health. More than half of women within the study who reported poor menstrual health (FGS  
30  
31 387 = 73.5%; UGS = 54.6%), either as irregular, painful or seized menstruation, were found to either shed  
32  
33 388 eggs in urine (positive for UGS), or were positive for FGS, but without eggs in urine; showing more  
34  
35 389 women positive for FGS reporting abnormal menstruation, than for UGS. This confirms recent  
36  
37 390 analysis[17, 33] and suggests strong linkages between menstrual health management and FGS[15, 17],  
38  
39 391 an under researched area. This can be credited to the fact that symptoms perhaps diminished after a  
40  
41 392 while with UGS (maybe as a result of treatment in mass drug administration campaigns), but later  
42  
43 393 resurface with more chronic sequelae of FGS[17], and with more dire symptoms and negative impact  
44  
45 394 on menstrual health[17, 33]. In our study context, post-menarche females already faced a substantial  
46  
47 395 challenge with limited access to hygienic material and information on menstrual health management,  
48  
49 396 typically relying on self-made clothes and absorbent plant leaves during menstruation, due to lack of  
50  
51 397 finances or general knowledge.

52  
53  
54  
55 398 Still related to FGS and menstrual health, narratives from a previous study[33] which used qualitative  
56  
57 399 probing showed women having manifestations of FGS and not shedding eggs in urine, gave a history of  
58  
59 400 having lived in their earlier years in heavily infested *S. haematobium* foci. This explained their later

1  
2  
3 401 manifestation of FGS symptoms, even after having moved away to a less infested area, with more than  
4  
5 402 90% limit in fresh water contact[33]. This is similar to our findings, where lake proximity was seen to  
6  
7 403 be not very significant to FGS manifestation (Table 4), same as egg shedding, still pointing to early-in-  
8  
9 404 life infection and later chronicity. Significant difference in menstrual abnormalities amongst UGS  
10  
11 405 positive women [n=22 (56.4%)] and UGS negative women [n=12 (44.4%)], alerts to future chronicity  
12  
13 406 of FGS after UGS, especially if not managed with more readily available praziquantel treatment(s)[42,  
14  
15 407 52].

16  
17  
18 408 On its own, lower abdominal pain observed significant association (in adjusted and unadjusted  
19  
20 409 regression models) in both UGS and FGS. The chances of having lower abdominal pain were  
21  
22 410 significantly higher in females with either FGS (94.1%) or UGS (84.2%). Similarly with coital pain and  
23  
24 411 vaginal itches, these reported as key indicators for UGS and FGS, directing early diagnosis of UGS and  
25  
26 412 future FGS in endemic communities, thereby promoting the verticalization of control strategies for both  
27  
28 413 diseases.

29  
30  
31 414 Another trend observed in this study is that intensity of infection or egg patent-prevalence (for UGS)  
32  
33 415 reduces while chronic disease or morbidity for FGS increases as women age. The chances of FGS after  
34  
35 416 UGS increased significantly (AOR 6.43,95% C.I 1.62-30.35, P=0.0091) as women aged (36+). Similar  
36  
37 417 findings have been reported in other studies in different geographical locations[6, 14, 53, 54] and  
38  
39 418 recently in this area[33]; emphasizing on the level of present intensity for UGS, and possible future  
40  
41 419 occurrence of FGS[14, 54]. UGS at a younger age will in some cases manifest into FGS when the female  
42  
43 420 is older[14], causing more intense gynecological symptoms and effects. This offers a possible guiding  
44  
45 421 tool for better control policies, related to early diagnosis and treatment[41, 55]. This surpasses need  
46  
47 422 alone for school-based MDAs[13, 28, 56], but considers and encourages individual therapy in different  
48  
49 423 contexts for FGS (and MGS)[6].

50  
51  
52  
53 424 Although only a few amongst the extensive list of reproductive health determinants [54] were identified  
54  
55 425 in this study to be statistically significant, where mostly reported symptoms were collected, clinical and  
56  
57 426 biological examinations carried out, enabled confirmation of how future self-reported symptoms with  
58  
59 427 UGS and FGS might be best used[33]. These results support the advocated need for further attention on

1  
2  
3 428 post-transmission schistosomiasis[57], and also, the availability of praziquantel in lowest level (Health  
4  
5 429 Areas and community) health care for individual therapy[54], as well as treatment from a younger  
6  
7 430 age[15, 28, 41, 52], buoyed with the recent development of pediatric praziquantel[58].  
8  
9

### 10 431 **Study Limitations**

11  
12 432 Though described as gold standard[49], active UGS was only detected through observation of eggs in  
13  
14 433 urine samples by microscopic-based poly-carbonate filter examination, as well as recommended dipstick  
15  
16 434 assays for urinary hematuria detection. Alternative molecular assays such as polymerase chain reaction  
17  
18 435 (PCR) for schistosome detection in human serum and urine samples[12], were not considered for added  
19  
20 436 sensitivity for UGS and FGS (in vaginal lavage analysis)[3, 59]. Though recommended[12, 21], only  
21  
22 437 visual examination through inspection for lesions on the cervix, the fornices, and the vaginal walls with  
23  
24 438 a colposcope[5, 51] and screening with questionnaires[10] was considered in the detection of FGS in  
25  
26 439 this study. Lastly, clinical diagnosis of FGS was carried out only on a limited sub-group of females,  
27  
28 440 where more precise conclusions may be obtained by using an appropriate sample size.  
29  
30  
31

### 32 441 **Conclusion**

33  
34  
35 442 Whilst millions of women in Cameroon have UGS, its epidemiological connection with FGS is not  
36  
37 443 fully appreciated, which creates an unfortunate knowledge holdup for effective control at the public  
38  
39 444 health level. In our chosen study location, which is broadly typical for endemic areas of UGS in  
40  
41 445 Cameroon[21, 34, 36, 40], strong epidemiological associations between UGS and FGS were found  
42  
43 446 against certain key sexual and reproductive determinants: age, lower abdominal pain and menstrual  
44  
45 447 health. This formative knowledge could be utilized to tackle and ultimately prevent FGS, with a more  
46  
47 448 targeted integrated control for UGS in Cameroon and elsewhere in endemics areas for UGS globally.  
48  
49 449 This study further adds detailed insight into the connection of FGS and UGS within primary care in  
50  
51 450 endemic communities, denoting those with cardinal symptomologies more explicitly for scalable  
52  
53 451 detection and targeted control of FGS within UGS endemic areas.  
54  
55  
56

57 452

### 58 453 **Supporting Files**

1  
2  
3 454 Supplementary File 1.docx : Structured questionnaire

4  
5 455 Supplementary File 2.docx: Deviance Table

6  
7 456

8  
9  
10 457 **Declarations**

11 458 • **Authors' contributions**

12  
13  
14 459 MCM and JRS conceptualized the study and planned the methodology; AEN, VG, MCM, carried out  
15  
16 460 field investigation; FNB, MCM, JRS, ASO, AEN, VG, analyzed and interpreted the data for this  
17  
18 461 manuscript; MCM acquired funding for study and wrote the original draft of the manuscript; JRS  
19  
20 462 supervised the study and was a major contributor in the conceptualization and writing of the manuscript;  
21  
22 463 AEN, coordinated field activities within the Malantouen Health District; AEN, FNB, VG, ASO,  
23  
24 464 reviewed and edited the manuscript. All authors approved the final version of the paper before  
25  
26 465 submission.

27  
28  
29  
30 466

31  
32  
33 467 • **Competing interests**

34  
35  
36 468 The authors declare that they have no competing interests.

37  
38  
39 469 • **Funding**

40  
41  
42 470 This study is funded through a fellowship offered by "l'Organisation de Coordination pour la lutte contre  
43  
44 471 les Endémies en Afrique Centrale (OCEAC)", financed by the Ministry for Economic Cooperation and  
45  
46 472 Development (BMZ) of the Federal Republic of Germany, through the KfW (German Development  
47  
48 473 Bank). "Projet Lutte Contre Les Maladies Tropicales Négligées en Afrique Centrale" (MTN) BMZ-Nr  
49  
50 474 2015.69.227 BMZ 2016.68.797. The funders had no role in study design, data collection and analysis,  
51  
52 475 decision to publish, or preparation of the manuscript.

53  
54  
55  
56 476 • **Data Sharing Statement**

1  
2  
3 477 All data generated or analysed during this study are included in this published article [and its  
4  
5 478 supplementary files].  
6  
7

8  
9 479 • **Acknowledgements**

10  
11 480 We most specifically acknowledge and appreciate the immense contribution of the reviewers for this  
12  
13 481 revised and very much updated version of this manuscript. We recognize here the National Program for  
14  
15 482 the fight against Schistosomiasis and Soil-Transmitted Helminths in Cameroon (PNLSHi) for their  
16  
17 483 effort in the control of schistosomiasis in Cameroon. Thanks to the contribution of Dr Wepnje Godlove  
18  
19 484 and Marlene Nstinda Tchoffo in this research, and to all health workers and study participants at the  
20  
21 485 Matta Health Area for their support and sacrifice. We express appreciation to Dr. Savadogo Bonaventure  
22  
23 486 and Dr Patty Ngassa of the MTN-OCEAC Project for their technical advice and Coordination.  
24  
25

26  
27 487 • **License Statement**

28 488 I, the Submitting Author has the right to grant and does grant on behalf of all authors of the Work (as  
29  
30 489 defined in the below author licence), an exclusive licence and/or a non-exclusive licence for  
31  
32 490 contributions from authors who are: i) UK Crown employees; ii) where BMJ has agreed a CC-BY  
33  
34 491 licence shall apply, and/or iii) in accordance with the terms applicable for US Federal Government  
35  
36 492 officers or employees acting as part of their official duties; on a worldwide, perpetual, irrevocable,  
37  
38 493 royalty-free basis to BMJ Publishing Group Ltd (“BMJ”) its licensees and where the relevant Journal is  
39  
40 494 co-owned by BMJ to the co-owners of the Journal, to publish the Work in BMJ Global Health and any  
41  
42 495 other BMJ products and to exploit all rights, as set out in our licence.  
43  
44  
45  
46

47 497 The Submitting Author accepts and understands that any supply made under these terms is made by  
48  
49 498 BMJ to the Submitting Author unless you are acting as an employee on behalf of your employer or a  
50  
51 499 postgraduate student of an affiliated institution which is paying any applicable article publishing charge  
52  
53 500 (“APC”) for Open Access articles. Where the Submitting Author wishes to make the Work available on  
54  
55 501 an Open Access basis (and intends to pay the relevant APC), the terms of reuse of such Open Access  
56  
57 502 shall be governed by a Creative Commons licence – details of these licences and which Creative  
58  
59 503 Commons licence will apply to this Work are set out in our licence referred to above.  
60



1  
2  
3 504 • **Consent for publication**  
4  
5

6 505 Written informed consent for publication of clinical details and/or clinical images was obtained from  
7  
8 506 the patients and parents/guardians where needed.  
9

10  
11 507

12  
13  
14 508 **References**  
15

- 16 509 1. Freer JB, Bourke CD, Durhuus GH, Kjetland EF, Prendergast AJ. Schistosomiasis in the first  
17 510 1000 days. *The Lancet Infectious Diseases*. 2018;18(6):e193-e203.
- 18 511 2. WHO. Prevention and Control of Schistosomiasis and Soil Transmitted Helminths Geneva:  
19 512 WHO; 2002 [33/63]. Available from:  
20 513 [http://apps.who.int/iris/bitstream/handle/10665/42588/WHO\\_TRS\\_912.pdf;jsessionid=297C20DDFC](http://apps.who.int/iris/bitstream/handle/10665/42588/WHO_TRS_912.pdf;jsessionid=297C20DDFCBFFF9F9AAE9DF120C0F834?sequence=1)  
21 514 [BFFF9F9AAE9DF120C0F834?sequence=1](http://apps.who.int/iris/bitstream/handle/10665/42588/WHO_TRS_912.pdf;jsessionid=297C20DDFCBFFF9F9AAE9DF120C0F834?sequence=1).  
22 515 3. Utzinger J, Becker SL, van Lieshout L, van Dam GJ, Knopp S. New diagnostic tools in  
23 516 schistosomiasis. *Clinical microbiology and infection : the official publication of the European Society*  
24 517 *of Clinical Microbiology and Infectious Diseases*. 2015;21(6):529-42.
- 25 518 4. Søfteland S, Sebitloane MH, Taylor M, Roald BB, Holmen S, Galappaththi-Arachchige HN, et  
26 519 al. A systematic review of handheld tools in lieu of colposcopy for cervical neoplasia and female  
27 520 genital schistosomiasis. *International Journal of Gynecology & Obstetrics*. 2021;153(2):190-9.
- 28 521 5. WHO. Female Genital Schistosomiasis: A Pocket Atlas for Clinical Health-Care Professionals  
29 522 Geneva: WHO Press; 2015 [Available from:  
30 523 <https://www.who.int/publications/i/item/9789241509299>.  
31 524 6. Kjetland E, Leutscher P, Ndhlovu P. A review of female genital schistosomiasis. *Trends in*  
32 525 *Parasitology*. 2012;28(2):58-65.
- 33 526 7. Poggensee G, Kiwelu I, Saria M, Richter J, Krantz I, Feldmeier H. Schistosomiasis of the lower  
34 527 reproductive tract without egg excretion in urine. *The American journal of tropical medicine and*  
35 528 *hygiene*. 1998;59(5):782-3.
- 36 529 8. Christinet V, Lazdins-Helds J, Stothard J, Reinhard-Rupp J. Female genital schistosomiasis  
37 530 (FGS): from case reports to a call for concerted action against this neglected gynaecological disease.  
38 531 *International Journal for Parasitology*. 2016;46(7):395-404.
- 39 532 9. Shams M, Khazaei S, Ghasemi E, Nazari N, Javanmardi E, Majidiani H, et al. Prevalence of  
40 533 urinary schistosomiasis in women: a systematic review and meta-analysis of recently published  
41 534 literature (2016–2020). *Tropical Medicine and Health*. 2022;50(1):12.
- 42 535 10. Ekpo U, Odeyemi O, Sam-Wobo S, Onunkwor O, Mogaji H, Oluwole A, et al. Female genital  
43 536 schistosomiasis (FGS) in Ogun State, Nigeria: a pilot survey on genital symptoms and clinical findings.  
44 537 *Parasitology Open*. 2017;3:e10.
- 45 538 11. Hotez PJ, Engels D, Gyapong M, Ducker C, Malecela MN. Female Genital Schistosomiasis. *New*  
46 539 *England Journal of Medicine*. 2019;381(26):2493-5.
- 47 540 12. Galappaththi-Arachchige HN, Holmen S, Koukounari A, Kleppa E, Pillay P, Sebitloane M, et al.  
48 541 Evaluating diagnostic indicators of urogenital *Schistosoma haematobium* infection in young women:  
49 542 A cross sectional study in rural South Africa. *PLoS one*. 2018;13(2):e0191459.
- 50 543 13. Wiegand RE, Fleming FM, de Vlas SJ, Odiere MR, Kinung'hi S, King CH, et al. Defining  
51 544 elimination as a public health problem for schistosomiasis control programmes: beyond prevalence  
52 545 of heavy-intensity infections. *The Lancet Global Health*. 2022;10(9):e1355-e9.
- 53 546 14. Hegertun I, Gundersen S, Kleppa E, Zulu S, Gundersen S, Taylor M, et al. *S. haematobium* as a  
54 547 common cause of genital morbidity in girls: a cross-sectional study of children in South Africa. *PLoS*  
55 548 *neglected tropical diseases*. 2013;7(3):e2104.

- 1  
2  
3 549 15. UNAIDS. 'No more neglect:Female genital schistosomiasis and HIV.  
4 550 [www.unaids.org/en/resources/documents/2019/](http://www.unaids.org/en/resources/documents/2019/); UNAIDS; 2019.
- 5 551 16. Hotez P. Speaking of Medicine and Health [Internet]. BLOGS P, editor: PLOS BLOGS. 2013.  
6 552 Available from: [https://speakingofmedicine.plos.org/2013/05/06/female-genital-schistosomiasis-fgs-](https://speakingofmedicine.plos.org/2013/05/06/female-genital-schistosomiasis-fgs-sub-saharan-africas-secret-scourge-of-girls-and-women/)  
7 553 [sub-saharan-africas-secret-scourge-of-girls-and-women/](https://speakingofmedicine.plos.org/2013/05/06/female-genital-schistosomiasis-fgs-sub-saharan-africas-secret-scourge-of-girls-and-women/).
- 8 554 17. Stothard JR, Odiere MR, Phillips-Howard PA. Connecting Female Genital Schistosomiasis and  
9 555 Menstrual Hygiene Initiatives. *Trends in Parasitology*. 2020;38(5).
- 10 556 18. Bustinduy AL, Randriansolo B, Sturt AS, Kayuni SA, Leustcher PDC, Webster BL, et al. An  
11 557 update on female and male genital schistosomiasis and a call to integrate efforts to escalate  
12 558 diagnosis, treatment and awareness in endemic and non-endemic settings: The time is now. In:  
13 559 Rollinson D, Stothard R, editors. *Advances in Parasitology*. 115: Academic Press; 2022. p. 1-44.
- 14 560 19. Majangara Karaga R. Concealed urogenital schistosomiasis causing chronic pelvic pain: A case  
15 561 report. *Clinical Case Reports*. 2021;9(4):1860-4.
- 16 562 20. Stothard J. Female genital schistosomiasis - icebergs of morbidity ahead? *Trends in*  
17 563 *parasitology*. 2012;28(5):174-5.
- 18 564 21. Campbell S, Stothard J, O'Halloran F, Sankey D, Durant T, Ombede D, et al. Urogenital  
19 565 schistosomiasis and soil-transmitted helminthiasis (STH) in Cameroon: An epidemiological update at  
20 566 Barombi Mbo and Barombi Kotto crater lakes assessing prospects for intensified control  
21 567 interventions. *Infectious diseases of poverty*. 2017;6(1):49-.
- 22 568 22. King C. Parasites and poverty: the case of schistosomiasis. *Acta tropica*. 2010;113(2):95-104.
- 23 569 23. Kjetland EF, Mduluzi T, Ndhlovu PD, Gomo E, Gwanzura L, Midzi N, et al. Genital  
24 570 schistosomiasis in women: a clinical 12-month in vivo study following treatment with praziquantel.  
25 571 *Trans R Soc Trop Med Hyg*. 2006;100(8):740-52.
- 26 572 24. Treatment of Female Genital Schistosomiasis (FGS) With Praziquantel: A Proof-of-Concept  
27 573 Study (NCT04115072) [Internet]. NIH: ClinicalTrials.gov archive. 2020 [cited 31/01/2022].
- 28 574 25. Brindley PJ, Hotez PJ. Break Out: urogenital schistosomiasis and *Schistosoma haematobium*  
29 575 infection in the post-genomic era. *PLoS Negl Trop Dis*. 2013;7(3):e1961.
- 30 576 26. Secor WE, Colley DG. When Should the Emphasis on Schistosomiasis Control Move to  
31 577 Elimination? *Trop Med Infect Dis*. 2018;3(3).
- 32 578 27. Kukula VA, MacPherson EE, Tsey IH, Stothard JR, Theobald S, Gyapong M. A major hurdle in  
33 579 the elimination of urogenital schistosomiasis revealed: Identifying key gaps in knowledge and  
34 580 understanding of female genital schistosomiasis within communities and local health workers. *PLoS*  
35 581 *neglected tropical diseases*. 2019;13(3):e0007207.
- 36 582 28. Faust CL, Osakunor DNM, Downs JA, Kayuni S, Stothard JR, Lamberton PHL, et al.  
37 583 *Schistosomiasis Control: Leave No Age Group Behind*. *Trends Parasitol*. 2020;36(7):582-91.
- 38 584 29. World Health Organisation. WHO guideline on control and elimination of human  
39 585 schistosomiasis. <https://www.who.int/publications/i/item/9789240041608>; WHO; 2022. p. 142.
- 40 586 30. Bergquist R, Yang G-J, Knopp S, Utzinger J, Tanner M. Surveillance and response: Tools and  
41 587 approaches for the elimination stage of neglected tropical diseases. *Acta Tropica*. 2015;141:229-34.
- 42 588 31. SCI Foundation. FAST PACKAGE PROJECT 2021 [Available from:  
43 589 <https://schistosomiasiscontrolinitiative.org/projects/fast-research-project>
- 44 590 32. Ndassi VD, Anchang-Kimbi JK, Sumbele IUN, Ngufor LA, Nadege K, Kimbi HK. The  
45 591 epidemiological status of urogenital schistosomiasis among reproductive aged individuals in the Tiko  
46 592 Health Area- a semi-urban setting in the Mount Cameroon area. *PLOS Neglected Tropical Diseases*.  
47 593 2021;15(1):e0008978.
- 48 594 33. Masong MC, Wepnje GB, Marlene NT, Gamba V, Mengue M-T, Kouokam E, et al. Female  
49 595 Genital Schistosomiasis (FGS) in Cameroon: A formative epidemiological and socioeconomic  
50 596 investigation in eleven rural fishing communities. *PLOS Global Public Health*. 2021;1(10):e0000007.
- 51 597 34. TchuentÉ LAT, N'Goran EK. Schistosomiasis and soil-transmitted helminthiasis control in  
52 598 Cameroon and Côte d'Ivoire: implementing control on a limited budget. *Parasitology*.  
53 599 2009;136(13):1739-45.
- 54  
55  
56  
57  
58  
59  
60

- 1  
2  
3 600 35. National Program for the control of Schistosomiasis and intestinal helminthiasis MoPHC.  
4 601 Towards elimination of Schistosomiasis and Soil-transmitted Helminthiasis and in Cameroon: A road  
5 602 map for paradigm shift 2021-2030. MINSANTE, Yaoundé: MINSANTE; 2022.
- 6 603 36. National Program for the control of Schistosomiasis and intestinal helminthiasis. Progress  
7 604 Report Cameroon 2013-2019. Yaoundé: MINSANTE; 2019.
- 8 605 37. World Health Organization. Global update on implementation of preventive chemotherapy  
9 606 against neglected tropical diseases in 2018. *Weekly Epidemiological Record* 2019;94(38):425-38.
- 10 607 38. Crompton DWT, World Health Organization. Preventive chemotherapy in human  
11 608 helminthiasis : coordinated use of anthelmintic drugs in control interventions : a manual for health  
12 609 professionals and programme managers. Geneva: World Health Organization; 2006.
- 13 610 39. Makia C, Ozano K, Tagne M, Tchoffo M, Ngang S, Thomson R, et al. Achieving equity in UHC  
14 611 interventions: who is left behind by neglected tropical disease programmes in Cameroon? *Glob  
15 612 Health Action*. 2021;14(1):1886457-.
- 16 613 40. Njunda A, Ndzi E, Assob J, Kamga H, Kwenti E. Prevalence and factors associated with  
17 614 urogenital schistosomiasis among primary school children in barrage, Magba sub-division of  
18 615 Cameroon. *BMC Public Health*. 2017;17(1):618.
- 19 616 41. Deworming adolescent girls and women of reproductive age. Policy Brief [press release].  
20 617 Geneva: WHO2022.
- 21 618 42. Nour M. Schistosomiasis: health effects on women. *Rev Obstet Gynecol*. 2010;3(1):28-32.
- 22 619 43. MINSANTE. Schistosomiasis distribution in Malanteoun Health District NTDmaps.org:  
23 620 MINSANTE; 2018 [Available from: <https://ntdmaps.org/>].
- 24 621 44. National Institute of Statistics Cameroon. Socio-economic statistics of Cameroon, 2015  
25 622 Cameroon2004-2014 [Available from: [https://cameroon.opendataforafrica.org/SESC2015/socio-  
26 623 economic-statistics-of-cameroon-2015](https://cameroon.opendataforafrica.org/SESC2015/socio-economic-statistics-of-cameroon-2015)].
- 27 624 45. Keptcheu T, Khan P, Gustave L, Gangue T. Some Haematological Parameters among Urinary  
28 625 Schistosomiasis-Malaria Coinfected Children in Suburb of Malentouen Health District, West Region  
29 626 Cameroon. *International Journal of Tropical Disease & Health*. 2020:34-44.
- 30 627 46. Daniels W. Biostatistics: A foundation for analysis in the health sciences. New York: Wiley &  
31 628 sons; 1999.
- 32 629 47. Gnoth C, Godehardt E, Frank-Herrmann P, et al. Definition and prevalence of subfertility and  
33 630 infertility. *Human Reproduction* (Oxford, England). 2005 May;20(5):1144-1147. DOI:  
34 631 10.1093/humrep/deh870. PMID: 15802321.
- 35 632 48. Colley DG, Bustinduy AL, Secor WE, King CH. Human schistosomiasis. *Lancet* (London,  
36 633 England). 2014;383(9936):2253-64.
- 37 634 49. World Health Organisation. Schistosomiasis WHO: WHO; 2022 [cited 2022. Available from:  
38 635 <https://www.who.int/news-room/fact-sheets/detail/schistosomiasis>].
- 39 636 50. World Health Organization. Regional Office for the Western Pacific. People Centered Health  
40 637 care: A policy framework. 2007.
- 41 638 51. Kjetland EF, Norseth HM, Taylor M, Lillebø K, Kleppa E, Holmen SD, et al. Classification of the  
42 639 lesions observed in female genital schistosomiasis. *International journal of gynaecology and  
43 640 obstetrics: the official organ of the International Federation of Gynaecology and Obstetrics*.  
44 641 2014;127(3):227-8.
- 45 642 52. Bustinduy AL, Friedman JF, Kjetland EF, Ezeamama AE, Kabatereine NB, Stothard JR, et al.  
46 643 Expanding Praziquantel (PZQ) Access beyond Mass Drug Administration Programs: Paving a Way  
47 644 Forward for a Pediatric PZQ Formulation for Schistosomiasis. *PLOS Neglected Tropical Diseases*.  
48 645 2016;10(9):e0004946.
- 49 646 53. Chetty A, Omondi MA, Butters C, Smith KA, Katawa G, Ritter M, et al. Impact of Helminth  
50 647 Infections on Female Reproductive Health and Associated Diseases. *Front Immunol*. 2020;11:577516.
- 51 648 54. Stothard JR, Stanton, M, Bustinduy, A, Sousa-Figueiredo, J C, Van Dam, GT, Betson, M, et al.,.  
52 649 Diagnostics for schistosomiasis in Africa and Arabia: A review of present options in control and future  
53 650 needs for elimination. *Cambridge core*. 2014(141):1947-61.

- 1  
2  
3 651 55. Richardson ST, Franklin AL, Rome ES, Simms-Cendan JS. Global Health: Urogenital  
4 652 Schistosomiasis in the Adolescent Girl. *Journal of Pediatric and Adolescent Gynecology*.  
5 653 2016;29(4):326-32.  
6 654 56. Oluwole AS, Ekpo UF, Nebe OJ, Akpan NM, Jacob SM, Amazigo UV, et al. The new WHO  
7 655 guideline for control and elimination of human schistosomiasis: implications for the Schistosomiasis  
8 656 Elimination Programme in Nigeria. *Infectious Diseases of Poverty*. 2022;11(1):111.  
9 657 57. Giboda M, Bergquist R. Schistosomiasis at the Crossroad to Elimination: Review of Eclipsed  
10 658 Research with Emphasis on the Post-Transmission Agenda. 2022;7(4).  
11 659 58. Pediatric Praziquantel Consortuim. Contract manufacturing agreement signed for production  
12 660 of new pediatric treatment for schistosomiasis 2021 [Available from:  
13 661 <http://https://www.pediatricpraziquantelconsortium.org/>.  
14 662 59. Sturt A, Webb E, Phiri C, Mweene T, Chola N, van Dam G, et al. Genital self-sampling  
15 663 compared with cervicovaginal lavage for the diagnosis of female genital schistosomiasis in Zambian  
16 664 women: The BILHIV study. *PLOS Neglected Tropical Diseases*. 2020;14(7):e0008337.  
17  
18  
19  
20  
21  
22  
23

22 666 • **Figure Legends**

23  
24 667 **Figure1:** Study participant selection criteria and numbers with diagnostic methods flow

25  
26 668 **Figure 2:** Imagery of FGS pathology of the cervix with reported lesions (magnification of x4)

27  
28 669 **A)** 1-rubbery papule, 2-abnormal blood vessel, 3- homogeneous sandy patch (30-year-old woman, +UGS, +lower  
29 670 abdominal pain, +Menstrual irregularity); **B)** 1,2- grainy sandy patches (45-year-old woman, -UGS, +lower  
30 671 abdominal pain; +Menstrual irregularity)  
31  
32  
33  
34  
35  
36  
37  
38  
39  
40  
41  
42  
43  
44  
45  
46  
47  
48  
49  
50  
51  
52  
53  
54  
55  
56  
57  
58  
59  
60

## Sampling Flow Diagram

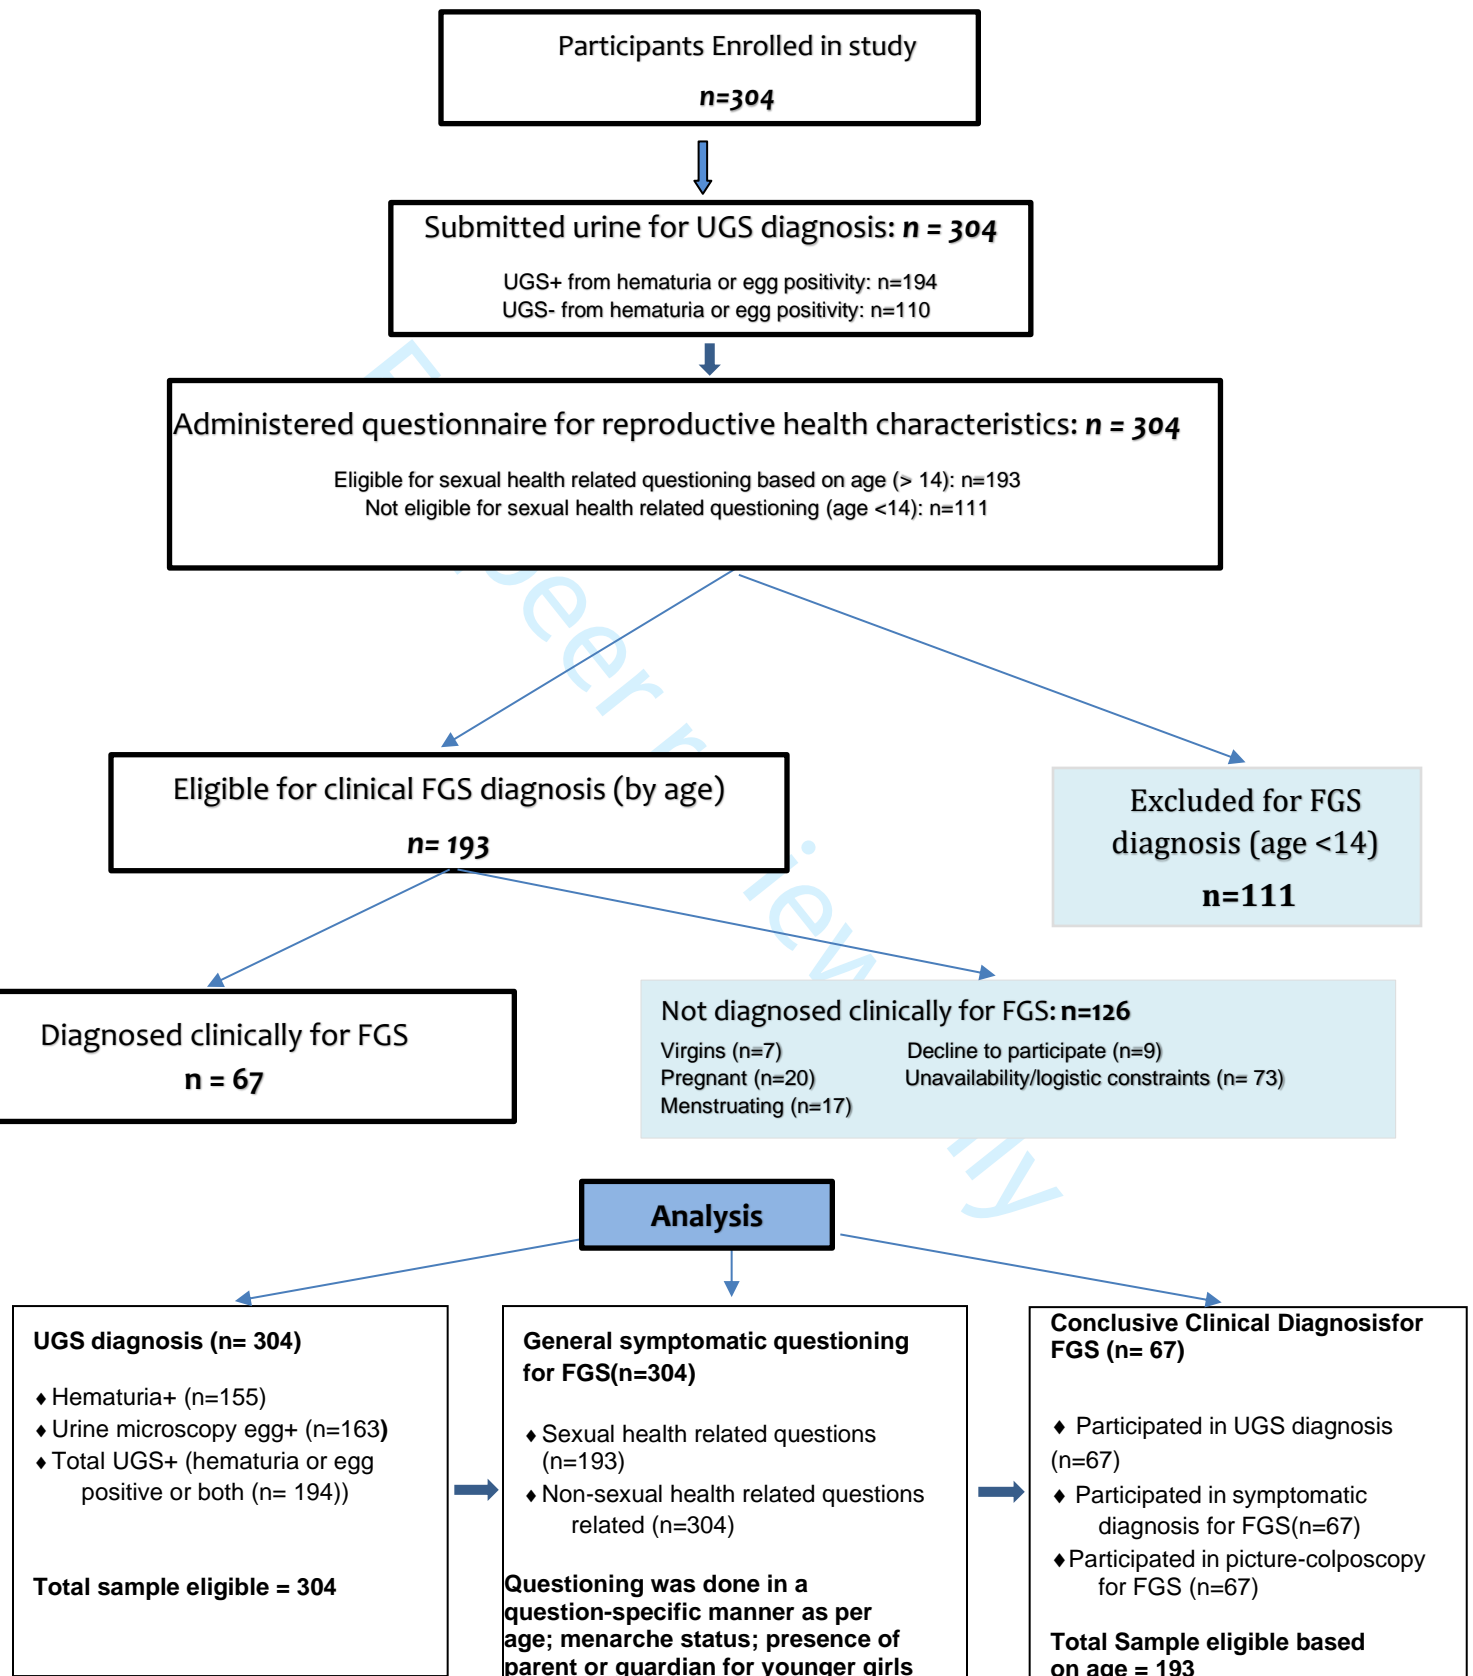



## Supplementary File 1

Close-ended structured questionnaire**A. Close ended structured questionnaire– Administered directly in English with oral translations into Fulbe, Kotoko, Mosgum, and Arab**

Name of Community: \_\_\_\_\_

Age (years): \_\_\_\_\_

Education: Informal education ( ) Formal education ( ) (specify) \_\_\_\_\_

Marital Status: Single ( ) Married ( ) Separated ( ) Widowed ( )

No of years having lived in community \_\_\_\_\_

Previous community \_\_\_\_\_

Economic activity-----

Residence ----- (collect coordinates)

**Questions on symptoms of urinary tract schistosomiasis; FGS; OR STI**

1. Do you see your menses? Yes ( ) No ( )
2. Did you observe/experience your menses within the last two weeks? Yes ( ) No ( ) Does your menses come every month? Regular?
3. Is your menses painful? \_\_\_\_\_(pain during menstruation – always very painful, sometimes painful, normal) Irregular? \_\_\_\_\_(every month?, not every month, stopped)
4. Do you have pain in your lower abdomen? When? For how long?
5. Do you have pain when urinating? Yes ( ) No ( )
6. Do you have difficulty in urinating (urine not coming out fluently)? Yes ( ) No ( )
7. Do you have sudden uncontrollable and unexpected urge to urinate and mostly cannot hold it? Even when you cough it comes out? Yes ( ) No ( )
8. Do you see blood in your urine? Yes ( ) No ( )
9. (If yes) When did you lastly see blood in your urine? \_\_\_\_\_Always, sometimes, Once in a while
10. Do you sometimes haveitching in your private part?Yes ( ) No ( )
11. How often do you experience this? Once a while ( ) frequently ( )/ When was the last time?
12. Do you have a feeling of burning within your private part? Yes ( ) No ( )

1  
2  
3 13. How often do you experience this? Once a while ( ) Frequently ( )  
4

5 14. Do you sense a swelling/lumps within your private part? Yes ( ) No ( ) No response ( )  
6

7 15. Do you have any discharge that comes from your vagina? Yes ( ) No ( ) Does it have an odour?  
8

9 \_\_\_\_\_ Do you see the colour? Yes ( ) No ( ) What Color is it? White; grey; green/yellow;  
10

11 brown  
12

13 16. Do you think this is normal? Yes ( ) No ( ) Do not know ( ). When did you start observing the  
14 discharge? Date \_\_\_\_\_  
15

16 17. After sexual intercourse do you have a discharge? Yes ( ) No ( ) Is it smelly? Yes ( ) No ( ) Do not  
17 know ( )  
18

19 18. After or during sexual intercourse do you have pain? Yes ( ) No ( ) I do not know ( ) ; Do  
20 you have a bloody discharge? Yes ( ) No ( ) I do not know ( )  
21

22 19. Have you had any miscarriages /pregnancies that passed? Yes ( ) No ( )  
23

24 20. How many? ( )  
25

26 21. Do you have children? Yes ( ) No ( )  
27

28 22. What age is your last child? ( )  
29

30 23. Have you visited the clinic to complain about these issues? Yes ( ) No ( )  
31

32 24. What you used/taken/done to treat any of these problems? \_\_\_\_\_ (Underline) Hospital  
33 or drug store/ local midwife/ traditional medicine/ prayers/ none of the above (what other?  
34 Specify)/nothing  
35  
36

### 37 **Water contact History**

38 1. Where do you fetch your household water? Lake; other source (name) \_\_\_\_\_  
39

40 2. Do you fish in the lake? Yes ( ), No ( )  
41

42 3. Do you bathe in the lake? Yes ( ), No ( )  
43

44 4. What do you use the lake for? ( ) \_\_\_\_\_  
45  
46  
47  
48  
49  
50  
51  
52  
53  
54  
55  
56  
57  
58  
59  
60



## Supplementary file 2

**Analysis of deviance tables for both best fitting models (FGS and UGS), with *p*-values based on likelihood ratio tests**

| Variable             | Df | Deviance | Resid. Df | Resid. Dev | Pr(>Chi)      |
|----------------------|----|----------|-----------|------------|---------------|
| <b>UGS</b>           |    |          |           |            |               |
| Age2                 | 2  | 19.0094  | 162       | 208.70     | 7.450e-05 *** |
| Lower Abdominal Pain | 1  | 25.6949  | 161       | 183.01     | 3.999e-07 *** |
| Coital Pain          | 1  | 4.4254   | 160       | 178.58     | 0.03541 *     |
| <b>FGS</b>           |    |          |           |            |               |
| Age2                 | 2  | 9.8057   | 64        | 83.061     | 0.0074253 **  |
| Coital Pain          | 1  | 11.3146  | 63        | 71.747     | 0.0007690 *** |
| Vaginal Itches       | 1  | 13.1740  | 62        | 58.573     | 0.0002839 *** |
| Lower Abdominal Pain | 1  | 10.5961  | 61        | 47.976     | 0.0011333 **  |

**STROBE 2007 (v4) checklist of items to be included in reports of observational studies in epidemiology\***  
**Checklist for cohort, case-control, and cross-sectional studies (combined)**

| Section/Topic             | Item # | Recommendation                                                                                                                                                                                                                                                                                                                                                                                                                                                         | Reported on page # |
|---------------------------|--------|------------------------------------------------------------------------------------------------------------------------------------------------------------------------------------------------------------------------------------------------------------------------------------------------------------------------------------------------------------------------------------------------------------------------------------------------------------------------|--------------------|
| Title and abstract        | 1      | (a) Indicate the study's design with a commonly used term in the title or the abstract                                                                                                                                                                                                                                                                                                                                                                                 | 1                  |
|                           |        | (b) Provide in the abstract an informative and balanced summary of what was done and what was found                                                                                                                                                                                                                                                                                                                                                                    | 2                  |
| <b>Introduction</b>       |        |                                                                                                                                                                                                                                                                                                                                                                                                                                                                        |                    |
| Background/rationale      | 2      | Explain the scientific background and rationale for the investigation being reported                                                                                                                                                                                                                                                                                                                                                                                   | 4-6                |
| Objectives                | 3      | State specific objectives, including any pre-specified hypotheses                                                                                                                                                                                                                                                                                                                                                                                                      | 6                  |
| <b>Methods</b>            |        |                                                                                                                                                                                                                                                                                                                                                                                                                                                                        |                    |
| Study design              | 4      | Present key elements of study design early in the paper                                                                                                                                                                                                                                                                                                                                                                                                                | 7-10               |
| Setting                   | 5      | Describe the setting, locations, and relevant dates, including periods of recruitment, exposure, follow-up, and data collection                                                                                                                                                                                                                                                                                                                                        | 7                  |
| Participants              | 6      | (a) <i>Cohort study</i> —Give the eligibility criteria, and the sources and methods of selection of participants. Describe methods of follow-up<br><i>Case-control study</i> —Give the eligibility criteria, and the sources and methods of case ascertainment and control selection. Give the rationale for the choice of cases and controls<br><i>Cross-sectional study</i> —Give the eligibility criteria, and the sources and methods of selection of participants | 8-9                |
|                           |        | (b) <i>Cohort study</i> —For matched studies, give matching criteria and number of exposed and unexposed<br><i>Case-control study</i> —For matched studies, give matching criteria and the number of controls per case                                                                                                                                                                                                                                                 | /                  |
| Variables                 | 7      | Clearly define all outcomes, exposures, predictors, potential confounders, and effect modifiers. Give diagnostic criteria, if applicable                                                                                                                                                                                                                                                                                                                               | 8-10               |
| Data sources/ measurement | 8*     | For each variable of interest, give sources of data and details of methods of assessment (measurement). Describe comparability of assessment methods if there is more than one group                                                                                                                                                                                                                                                                                   | 8-11               |
| Bias                      | 9      | Describe any efforts to address potential sources of bias                                                                                                                                                                                                                                                                                                                                                                                                              | /                  |
| Study size                | 10     | Explain how the study size was arrived at                                                                                                                                                                                                                                                                                                                                                                                                                              | 7-9                |
| Quantitative variables    | 11     | Explain how quantitative variables were handled in the analyses. If applicable, describe which groupings were chosen and why                                                                                                                                                                                                                                                                                                                                           | 9-10               |
| Statistical methods       | 12     | (a) Describe all statistical methods, including those used to control for confounding                                                                                                                                                                                                                                                                                                                                                                                  | 9-10               |
|                           |        | (b) Describe any methods used to examine subgroups and interactions                                                                                                                                                                                                                                                                                                                                                                                                    | 10                 |
|                           |        | (c) Explain how missing data were addressed                                                                                                                                                                                                                                                                                                                                                                                                                            | 7-8                |
|                           |        | (d) <i>Cohort study</i> —If applicable, explain how loss to follow-up was addressed<br><i>Case-control study</i> —If applicable, explain how matching of cases and controls was addressed                                                                                                                                                                                                                                                                              | /                  |

|                          |     |                                                                                                                                                                                                              |          |
|--------------------------|-----|--------------------------------------------------------------------------------------------------------------------------------------------------------------------------------------------------------------|----------|
|                          |     | <i>Cross-sectional study</i> —If applicable, describe analytical methods taking account of sampling strategy                                                                                                 |          |
|                          |     | (e) Describe any sensitivity analyses                                                                                                                                                                        | /        |
| <b>Results</b>           |     |                                                                                                                                                                                                              |          |
| Participants             | 13* | (a) Report numbers of individuals at each stage of study—eg numbers potentially eligible, examined for eligibility, confirmed eligible, included in the study, completing follow-up, and analysed            | 11-13    |
|                          |     | (b) Give reasons for non-participation at each stage                                                                                                                                                         | 7-8      |
|                          |     | (c) Consider use of a flow diagram                                                                                                                                                                           | 7        |
| Descriptive data         | 14* | (a) Give characteristics of study participants (eg demographic, clinical, social) and information on exposures and potential confounders                                                                     | 11-13    |
|                          |     | (b) Indicate number of participants with missing data for each variable of interest                                                                                                                          | /        |
|                          |     | (c) <i>Cohort study</i> —Summarise follow-up time (eg, average and total amount)                                                                                                                             | /        |
| Outcome data             | 15* | <i>Cohort study</i> —Report numbers of outcome events or summary measures over time                                                                                                                          | /        |
|                          |     | <i>Case-control study</i> —Report numbers in each exposure category, or summary measures of exposure                                                                                                         | /        |
|                          |     | <i>Cross-sectional study</i> —Report numbers of outcome events or summary measures                                                                                                                           | 11-13    |
| Main results             | 16  | (a) Give unadjusted estimates and, if applicable, confounder-adjusted estimates and their precision (eg, 95% confidence interval). Make clear which confounders were adjusted for and why they were included | 9, 12-15 |
|                          |     | (b) Report category boundaries when continuous variables were categorized                                                                                                                                    | 9, 12-15 |
|                          |     | (c) If relevant, consider translating estimates of relative risk into absolute risk for a meaningful time period                                                                                             | /        |
| Other analyses           | 17  | Report other analyses done—eg analyses of subgroups and interactions, and sensitivity analyses                                                                                                               | /        |
| <b>Discussion</b>        |     |                                                                                                                                                                                                              |          |
| Key results              | 18  | Summarise key results with reference to study objectives                                                                                                                                                     | 18-20    |
| Limitations              | 19  | Discuss limitations of the study, taking into account sources of potential bias or imprecision. Discuss both direction and magnitude of any potential bias                                                   | 21       |
| Interpretation           | 20  | Give a cautious overall interpretation of results considering objectives, limitations, multiplicity of analyses, results from similar studies, and other relevant evidence                                   | 21       |
| Generalisability         | 21  | Discuss the generalisability (external validity) of the study results                                                                                                                                        | 21       |
| <b>Other information</b> |     |                                                                                                                                                                                                              |          |
| Funding                  | 22  | Give the source of funding and the role of the funders for the present study and, if applicable, for the original study on which the present article is based                                                | 22       |

\*Give information separately for cases and controls in case-control studies and, if applicable, for exposed and unexposed groups in cohort and cross-sectional studies.

**Note:** An Explanation and Elaboration article discusses each checklist item and gives methodological background and published examples of transparent reporting. The STROBE checklist is best used in conjunction with this article (freely available on the Web sites of PLoS Medicine at <http://www.plosmedicine.org/>, Annals of Internal Medicine at <http://www.annals.org/>, and Epidemiology at <http://www.epidem.com/>). Information on the STROBE Initiative is available at [www.strobe-statement.org](http://www.strobe-statement.org).
