# Supplementary material for: Urogenital schistosomiasis (UGS) and female genital schistosomiasis (FGS) in Cameroon: an observational assessment of key reproductive health determinants of girls and women in the Matta Health Area
Source: PubMed Central journal article supplement — BMJ Open. 2023 Feb 14;13(2):e063392. doi: 10.1136/bmjopen-2022-063392 (PMC9930553; doi:10.1136/bmjopen-2022-063392), 2023-02-14
Supplement: bmjopen-2022-063392supp002.pdf [file bmjopen-2022-063392supp002.pdf]

## Supplementary file 2

**Analysis of deviance tables for both best fitting models (FGS and UGS), with  $p$ -values based on likelihood ratio tests**

| Variable             | Df | Deviance | Resid. Df | Resid. Dev | Pr(>Chi)      |
|----------------------|----|----------|-----------|------------|---------------|
| <b>UGS</b>           |    |          |           |            |               |
| Age2                 | 2  | 19.0094  | 162       | 208.70     | 7.450e-05 *** |
| Lower Abdominal Pain | 1  | 25.6949  | 161       | 183.01     | 3.999e-07 *** |
| Coital Pain          | 1  | 4.4254   | 160       | 178.58     | 0.03541 *     |
| <b>FGS</b>           |    |          |           |            |               |
| Age2                 | 2  | 9.8057   | 64        | 83.061     | 0.0074253 **  |
| Coital Pain          | 1  | 11.3146  | 63        | 71.747     | 0.0007690 *** |
| Vaginal Itches       | 1  | 13.1740  | 62        | 58.573     | 0.0002839 *** |
| Lower Abdominal Pain | 1  | 10.5961  | 61        | 47.976     | 0.0011333 **  |
